# Supplementary material for: Regio-divergent nickel catalysis: intramolecular [4+2] and [2+2] cycloaddition reactions between vinylallenes and alkynes
Source: Royal Society of Chemistry journal article supplement (doi:10.1039/d1cc03942c), 2021-01-01
Supplement: d1cc03942c1.pdf [file d1cc03942c1.pdf]

*Supporting Information for*

Regio-divergent Nickel Catalysis: Intramolecular [4+2] and [2+2] Cycloaddition Reactions  
Between Vinylallenes and Alkynes

Shigeru Arai,<sup>a,b\*</sup> Saki Inagaki<sup>a</sup>, Masaya Nakajima<sup>a,b</sup>, and Atsushi Nishida<sup>a,b</sup>

<sup>a</sup>*Graduate School of Pharmaceutical Sciences, Chiba University 1-8-1 Inohana, Chuo-ku, Chiba, 260-8675,  
Japan*

<sup>b</sup>*Molecular Chirality Research Center, Chiba University, 1-33, Yayoi-cho, Inage-ku, Chiba, 263-8522,  
Japan*

**Contents**

|                                                                      |             |
|----------------------------------------------------------------------|-------------|
| 1. General Information                                               | page S1.    |
| 2. Spectral data for products and substrates                         | page S2-5   |
| 3. Table S1: Catalyst screening for [2+2] cycloaddition of <b>1c</b> | Page S6     |
| 4. Spectral data for cyclization precursors                          | Page S7-17  |
| 3. NMR spectra                                                       | page S18-48 |
| 4. Computational details                                             | page S49-67 |

**General remarks:** All reactions were performed with dry solvents and reagents that were purified by the usual methods. Reactions were monitored by thin-layer chromatography carried out on 0.25 mm Merck silica gel plates (60F-254). Column chromatography was performed with Wakogel® 60N from Wako Pure Chemical Industries, or NH-silica (Fuji Silysia, DM2035). IR spectra were recorded on a JASCO FT/IR-230 Fourier transform spectrophotometer. NMR spectra were recorded on JEOL-JMN-ECS-400, -ECZ400, -ECZ600 and ECA-600 spectrometers operating at 400 and 600 MHz for  $^1\text{H}$  NMR and at 100 and 150 MHz for  $^{13}\text{C}$  NMR, with calibration using residual undeuterated solvent as an internal reference. Mass spectra were measured by The AccuTOFLC-plus JMS-T100LP (TOF) for LRMS and HRMS.

### General procedure for Ni(0)-catalyzed [4+2] cycloaddition reaction

A solution of a conjugated allenene-yne **1c** (18.5 mg, 0.040 mmol) with Ni[P(OPh)<sub>3</sub>]<sub>4</sub> (5.2 mg, 0.004 mmol) in toluene (0.4 mL, degassed by Freeze-Pump-Thaw method) was heated to 100 °C under an Ar atmosphere. The reaction mixture was filtered through Celite<sup>®</sup>, concentrated *in vacuo* and purified by column chromatography (*n*-Hexane/AcOEt = 50/1 to 20/1) to afford **2c** (17.8 mg, 0.038 mmol, 96%) as colorless solid.

### 8-(*tert*-butyl)-4-ethyl-7-phenyl-2-tosyl-1,2,3,7-tetrahydroisoquinoline (**2a**)

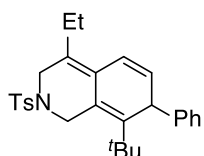

<sup>1</sup>H NMR (400 MHz, CDCl<sub>3</sub>) δ: 0.99 (t, *J* = 7.6 Hz, 3H), 1.15 (s, 9H), 2.07 (dq, *J* = 7.6, 14.8 Hz, 1H), 2.19 (dq, *J* = 7.6, 14.8 Hz, 1H), 2.45 (s, 3H), 3.19 (dd, *J* = 1.2, 13.6 Hz, 1H), 3.39 (d, *J* = 16.8 Hz, 1H), 4.03 (d, *J* = 16.8 Hz, 1H), 4.34 (br s, 1H), 4.99 (d, *J* = 13.6 Hz, 1H), 5.83 (dd, *J* = 5.2, 9.6 Hz, 1H), 6.26 (d, *J* = 9.6 Hz, 1H), 7.15-7.20 (m, 3H), 7.25-7.29 (m, 2H), 7.37 (d, *J* = 8.0 Hz, 2H), 7.75 (d, *J* = 8.0 Hz, 2H); <sup>13</sup>C NMR (100 MHz, CDCl<sub>3</sub>) δ: 13.3, 21.6, 23.9, 31.3, 36.3, 46.3, 47.3, 48.2, 118.8, 125.6, 126.2, 126.3, 127.8, 127.9, 128.8, 129.7, 129.7, 132.7, 133.1, 141.7, 143.6, 143.8; HRMS (ESI) *m/z* calcd for C<sub>28</sub>H<sub>33</sub>N<sub>1</sub>Na<sub>1</sub>O<sub>2</sub>Si<sub>1</sub><sup>+</sup> [M+Na]<sup>+</sup> 470.2130, found 470.2137; IR (ATR) *v*: 2964, 1490, 1400, 1340, 1235, 1163, 967 cm<sup>-1</sup>; yellow gum (87%, 30.3 mg).

### 8-(*tert*-butyl)-4-methyl-7-phenyl-2-tosyl-1,2,3,7-tetrahydroisoquinoline (**2b**)

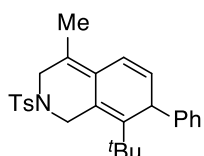

<sup>1</sup>H NMR (400 MHz, CDCl<sub>3</sub>) δ: 1.15 (s, 9H), 1.76 (s, 3H), 2.45 (s, 3H), 3.20 (d, *J* = 12.4 Hz, 1H), 3.36 (d, *J* = 17.6 Hz, 1H), 3.97 (d, *J* = 17.6 Hz, 1H), 4.34 (br s, 1H), 5.00 (d, *J* = 12.4 Hz, 1H), 5.82 (dd, *J* = 5.6, 9.6 Hz, 1H), 6.26 (d, *J* = 9.6 Hz, 1H), 7.15-7.20 (m, 3H), 7.26-7.29 (m, 2H), 7.37 (d, *J* = 8.4 Hz, 2H), 7.75 (d, *J* = 8.4 Hz, 2H); <sup>13</sup>C NMR (100 MHz, CDCl<sub>3</sub>) δ: 16.4, 21.5, 31.3, 36.3, 46.4, 47.3, 49.9, 119.2, 123.6, 126.2, 126.3, 126.4, 127.8, 127.8, 128.8, 129.7, 132.6, 133.2, 141.5, 143.6, 143.8; HRMS (ESI) *m/z* calcd for C<sub>27</sub>H<sub>31</sub>N<sub>1</sub>Na<sub>1</sub>O<sub>2</sub>Si<sub>1</sub><sup>+</sup> [M+Na]<sup>+</sup> 456.1973, found 456.1983; IR (ATR) *v*: 3023, 2956, 1488, 1399, 1337, 1238, 1164, 1026, 662 cm<sup>-1</sup>; m.p. 79-80 °C; colorless amorphous (43%, 17.5 mg)

### 8-(*tert*-butyl)-4-isopropyl-7-phenyl-2-tosyl-1,2,3,7-tetrahydroisoquinoline (**2c**)

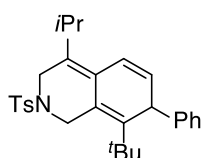

<sup>1</sup>H NMR (400 MHz, CDCl<sub>3</sub>) δ: 1.00 (d, *J* = 12.8 Hz, 3H), 1.02 (d, *J* = 12.8 Hz, 3H), 1.14 (s, 9H), 2.45 (s, 3H), 2.98-3.07 (m, 1H), 3.22 (d, *J* = 13.2 Hz, 1H), 3.39 (d, *J* = 17.6 Hz), 4.06 (d, *J* = 17.6 Hz, 1H), 4.34 (br s, 1H), 4.92 (d, *J* = 13.2 Hz, 1H), 5.83 (dd, *J* = 5.6, 9.6 Hz, 1H), 6.35 (d, *J* = 9.6 Hz, 1H), 7.12-7.19 (m, 3H), 7.25-7.29 (m, 2H), 7.36 (d, *J* = 8.4 Hz, 2H), 7.75 (d, *J* = 8.4 Hz, 2H); <sup>13</sup>C NMR (100 MHz, CDCl<sub>3</sub>) δ: 20.3, 21.1, 21.5, 28.5, 31.3, 36.3, 44.4, 46.4, 47.1, 118.6, 124.9, 126.3, 126.4, 127.8, 127.9, 128.7, 129.7, 132.8, 133.2, 141.8, 143.6, 143.9; HRMS (ESI) *m/z* calcd for C<sub>29</sub>H<sub>35</sub>N<sub>1</sub>Na<sub>1</sub>O<sub>2</sub>Si<sub>1</sub><sup>+</sup> [M+Na]<sup>+</sup> 484.2286, found 484.2284; IR (ATR) *v*: 2963, 1488, 1338, 1243, 1163, 907, 829 cm<sup>-1</sup>; m.p. 62-63 °C; colorless solid (96%, 44.4 mg)

### 4-isopropyl-7-phenyl-2-tosyl-8-(trimethylsilyl)-1,2,3,7-tetrahydroisoquinoline (**2d**)

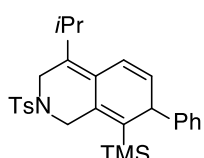

<sup>1</sup>H NMR (400 MHz, CDCl<sub>3</sub>) δ: 0.03 (s, 9H), 1.01 (d, *J* = 6.8 Hz, 3H), 1.03 (d, *J* = 6.8 Hz, 3H), 2.45 (s, 3H), 2.70-3.06 (m, 1H), 3.52-3.60 (m, 2H), 3.99 (d, *J* = 16.8 Hz, 1H), 4.23 (br s, 1H), 4.31 (d, *J* = 13.6 Hz, 1H), 5.86 (dd, *J* = 4.8, 9.6 Hz, 1H), 6.35 (d, *J* = 9.6 Hz, 1H), 7.10 (d, *J* = 7.2 Hz, 2H), 7.17-7.20 (m, 1H), 7.23-7.37 (m, 4H), 7.72 (d, *J* = 8.0 Hz, 2H); <sup>13</sup>C NMR (100 MHz, CDCl<sub>3</sub>) δ: 0.4, 20.2, 20.7, 21.5, 28.2, 44.6, 47.9, 48.6, 118.6, 122.5, 126.4, 127.8, 128.3, 128.6, 129.7, 133.1, 133.2, 134.0, 134.4, 137.2, 143.4, 143.6; HRMS (ESI) *m/z* calcd for C<sub>28</sub>H<sub>35</sub>N<sub>1</sub>Na<sub>1</sub>O<sub>2</sub>Si<sub>1</sub><sup>+</sup> [M+Na]<sup>+</sup> 500.2056, found 500.2053; IR (ATR) *v*: 2963, 1597, 1343, 1251, 1164, 1094, 843 cm<sup>-1</sup>; m.p. 59-60 °C; colorless amorphous (89%, 42.4 mg)

**8-(tert-butyl)-4-ethyl-7-(4-fluorophenyl)-2-tosyl-1,2,3,7-tetrahydroisoquinoline (2e)**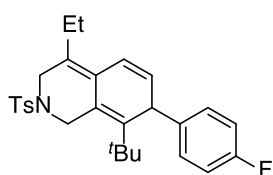

$^1\text{H}$  NMR (400 MHz,  $\text{CDCl}_3$ )  $\delta$ : 1.00 (t,  $J = 7.2$  Hz, 3H), 1.14 (s, 9H), 2.02-2.12 (m, 1H), 2.16-2.25 (m, 1H), 2.45 (s, 3H), 3.15 (d,  $J = 12.8$  Hz, 1H), 3.37 (d,  $J = 17.2$  Hz, 1H), 4.04 (d,  $J = 17.2$  Hz, 1H), 4.33 (br s, 1H), 4.98 (d,  $J = 12.8$  Hz, 1H), 5.80 (dd,  $J = 5.6, 9.6$  Hz, 1H), 6.27 (d,  $J = 9.6$  Hz, 1H), 6.96 (d,  $J = 8.8$  Hz, 1H), 6.97 (d,  $J = 8.8$  Hz, 1H), 7.11 (d,  $J = 8.8$  Hz, 1H), 7.12 (d,  $J = 8.8$  Hz, 1H), 7.36 (d,  $J = 8.0$  Hz, 2H), 7.74 (d,  $J = 8.0$  Hz, 2H);

$^{13}\text{C}$  NMR (100 MHz,  $\text{CDCl}_3$ )  $\delta$ : 13.3, 21.5, 23.9, 31.3, 36.2, 46.3, 46.4, 48.2, 115.5 (d,  $J = 21.0$  Hz), 119.0, 125.4, 126.3, 127.8, 129.3 (d,  $J = 7.7$  Hz), 129.7, 130.1, 132.5, 133.0, 139.6 (d,  $J = 2.9$  Hz), 141.7, 143.7, 161.4 (d,  $J = 244.1$  Hz);  $^{19}\text{F}$  NMR (376 MHz,  $\text{CDCl}_3$ )  $\delta$ : -116.5; HRMS (ESI)  $m/z$  calcd for  $\text{C}_{28}\text{H}_{32}\text{F}_1\text{N}_1\text{Na}_1\text{O}_2\text{S}_1^+$   $[\text{M}+\text{Na}]^+$  488.2036, found 488.2042; IR (ATR)  $\nu$ : 2965, 1504, 1339, 1220, 1164, 832  $\text{cm}^{-1}$ ; pale yellow gum (85%, 33.0 mg)

**8-(tert-butyl)-7-(4-fluorophenyl)-4-isopropyl-2-tosyl-1,2,3,7-tetrahydroisoquinoline (2f)**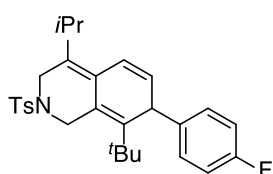

$^1\text{H}$  NMR (400 MHz,  $\text{CDCl}_3$ )  $\delta$ : 0.99 (d,  $J = 6.8$  Hz, 3H), 1.03 (d,  $J = 6.8$  Hz, 3H), 1.14 (s, 9H), 2.45 (s, 3H), 3.00-3.07 (m, 1H), 3.17 (d,  $J = 12.8$  Hz, 1H), 3.77 (d,  $J = 17.2$  Hz, 1H), 4.08 (d,  $J = 17.2$  Hz, 1H), 4.32 (br s, 1H), 4.92 (d,  $J = 12.8$  Hz, 1H), 5.80 (dd,  $J = 5.6, 9.6$  Hz, 1H), 6.35 (d,  $J = 9.6$  Hz, 1H), 6.90-7.00 (m, 2H), 7.08-7.17 (m, 2H), 7.37 (d,  $J = 7.6$  Hz, 2H), 7.75 (d,  $J = 7.6$  Hz, 2H);  $^{13}\text{C}$  NMR (100 MHz,  $\text{CDCl}_3$ )  $\delta$ : 20.2, 21.2, 21.5, 28.5,

31.3, 36.3, 44.4, 46.2, 46.4, 115.5 ( $J = 21.9$  Hz), 118.7, 124.7, 126.5, 127.8, 129.2 (d,  $J = 7.7$  Hz), 129.7, 132.6, 133.0, 133.2, 139.6 (d,  $J = 2.9$  Hz), 141.7, 143.6, 161.4 (d,  $J = 243.1$  Hz);  $^{19}\text{F}$  NMR (376 MHz,  $\text{CDCl}_3$ )  $\delta$ : -116.6; HRMS (ESI)  $m/z$  calcd for  $\text{C}_{29}\text{H}_{34}\text{F}_1\text{N}_1\text{Na}_1\text{O}_2\text{S}_1^+$   $[\text{M}+\text{Na}]^+$  502.2192, found 502.2187; IR (ATR)  $\nu$ : 2963, 1503, 1338, 1221, 1163, 831  $\text{cm}^{-1}$ ; m.p. 70  $^\circ\text{C}$ ; colorless amorphous (87%, 74.9 mg)

**8-(tert-butyl)-7-(4-methoxyphenyl)-4-methyl-2-tosyl-1,2,3,7-tetrahydroisoquinoline (2g)**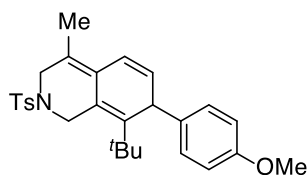

$^1\text{H}$  NMR (400 MHz,  $\text{CDCl}_3$ )  $\delta$ : 1.15 (s, 9H), 1.76 (s, 3H), 2.45 (s, 3H), 3.16 (d,  $J = 13.2$  Hz, 1H), 3.33 (d,  $J = 16.4$  Hz, 1H), 3.78 (s, 3H), 3.96 (d,  $J = 16.4$  Hz, 1H), 4.28 (br s, 1H), 4.99 (d,  $J = 13.2$  Hz, 1H), 5.82 (dd,  $J = 5.6, 9.6$  Hz, 1H), 6.25 (d,  $J = 9.6$  Hz, 1H), 6.82 (d,  $J = 8.4$  Hz, 2H), 7.01 (d,  $J = 8.4$  Hz, 2H), 7.37 (d,  $J = 8.4$  Hz, 2H), 7.74 (d,  $J = 8.4$  Hz, 2H);  $^{13}\text{C}$  NMR (100 MHz,  $\text{CDCl}_3$ )  $\delta$ : 16.4, 21.5, 31.3, 36.2, 46.3, 49.9,

55.2, 114.1, 118.9, 120.1, 125.7, 125.9, 126.2, 127.8, 128.8, 129.7, 129.8, 132.9, 133.0, 135.8, 141.8, 143.6, 158.1; HRMS (ESI)  $m/z$  calcd for  $\text{C}_{28}\text{H}_{33}\text{N}_1\text{Na}_1\text{O}_3\text{S}_1^+$   $[\text{M}+\text{Na}]^+$  486.2079, found 486.2078; IR (ATR)  $\nu$ : 2957, 1807, 1507, 1339, 1249, 1164, 828  $\text{cm}^{-1}$ ; pale yellow gummy amorphous (85%, 65.7 mg)

**8-(tert-butyl)-4-isopropyl-7-(4-methoxyphenyl)-2-tosyl-1,2,3,7-tetrahydroisoquinoline (2h)**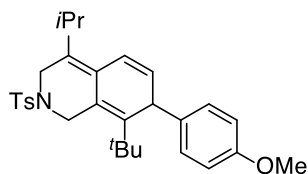

$^1\text{H}$  NMR (600 MHz,  $\text{CDCl}_3$ )  $\delta$ : 0.99 (d,  $J = 6.6$  Hz, 3H), 1.03 (d,  $J = 6.6$  Hz, 3H), 1.15 (s, 9H), 2.46 (s, 3H), 3.00-3.08 (m, 1H), 3.18 (d,  $J = 13.2$  Hz, 1H), 3.37 (d,  $J = 17.4$  Hz, 1H), 3.78 (s, 3H), 4.06 (d,  $J = 17.4$  Hz, 1H), 4.28 (br s, 1H), 4.92 (d,  $J = 13.2$  Hz, 1H), 5.82 (dd,  $J = 4.8, 9.6$  Hz, 1H), 6.33 (d,  $J = 9.6$  Hz, 1H), 6.82 (d,  $J = 9.0$  Hz, 2H), 7.06 (d,  $J = 9.0$  Hz, 2H), 7.37 (d,  $J = 8.4$  Hz, 2H), 7.75 (d,  $J = 8.4$  Hz, 2H);  $^{13}\text{C}$  NMR

(150 MHz,  $\text{CDCl}_3$ )  $\delta$ : 20.3, 21.2, 21.6, 28.4, 31.3, 36.3, 44.4, 46.1, 46.5, 55.2, 114.1, 118.3, 124.9, 126.1, 127.8, 128.8, 129.7, 132.6, 133.1, 133.2, 135.9, 142.1, 143.6, 158.1; HRMS (ESI)  $m/z$  calcd for  $\text{C}_{30}\text{H}_{37}\text{N}_1\text{Na}_1\text{O}_3\text{S}_1^+$   $[\text{M}+\text{Na}]^+$  514.2392, found 514.2380; IR (ATR)  $\nu$ : 2961, 1606, 1507, 1464, 1399, 1339, 1249, 1165, 829, 680  $\text{cm}^{-1}$ ; pale yellow gum (quant., 20.0 mg)

**8-(tert-butyl)-4-isopropyl-7-phenyl-3,7-dihydro-1H-isochromene (2i)**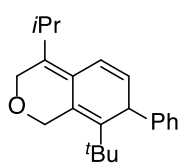

$^1\text{H NMR}$  (400 MHz,  $\text{CDCl}_3$ )  $\delta$ : 1.04 (d,  $J = 6.8$  Hz, 3H), 1.09 (d,  $J = 6.8$  Hz, 3H), 1.33 (s, 9H), 3.00-3.10 (m, 1H), 4.19 (d,  $J = 13.2$  Hz, 1H), 4.28 (br s, 1H), 4.29-4.38 (m, 2H), 5.06 (d,  $J = 13.2$  Hz, 1H), 5.83 (dd,  $J = 4.8, 9.6$  Hz, 1H), 6.41 (d,  $J = 9.6$  Hz, 1H), 7.15-7.30 (m, 5H);  $^{13}\text{C NMR}$  (100 MHz,  $\text{CDCl}_3$ )  $\delta$ : 20.3, 21.2, 27.7, 30.9, 31.3, 36.2, 46.9, 65.3, 67.2, 118.4, 123.5, 126.2, 127.7, 128.0, 128.6, 132.1, 135.8, 139.3, 144.3; HRMS (ESI)  $m/z$  calcd for  $\text{C}_{23}\text{H}_{32}\text{Na}_1\text{O}_2^+$

$[\text{M}+\text{MeOH}+\text{Na}]^+$  363.2300, found 363.2301; IR (ATR)  $\nu$ : 2961, 1598, 1398, 1364, 1239, 1119, 1017, 732, 701  $\text{cm}^{-1}$ ; pale yellow oil (97%, 35.0 mg). This product was purified by using NH silica gel column chromatography because of its unstability for normal silica gel.

**General procedure for Ni(II)-catalyzed [2+2] cycloaddition reaction**

A solution of conjugated allenene-yne **1a** (46.2 mg, 0.100 mmol),  $\text{NiF}_2 \cdot 4\text{H}_2\text{O}$  (1.7 mg, 0.010 mmol) in toluene (1.0 mL, degassed by Freeze-Pump-Thaw method) was heated to 150 °C under argon atmosphere. The reaction mixture was filtered through Celite<sup>®</sup>, concentrated *in vacuo* and purified by column chromatography (*n*-Hexane/AcOEt = 20/1 to 12/1) to afford pure **3a** (40.4 mg, 0.088 mmol, 88%) as pale yellow oil.

**(E)-8-(tert-butyl)-5-ethyl-7-styryl-3-tosyl-3-azabicyclo[4.2.0]octa-1(8),5-diene (3a)**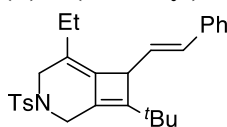

$^1\text{H NMR}$  (400 MHz,  $\text{CDCl}_3$ )  $\delta$ : 0.91 (t,  $J = 7.2$  Hz, 3H), 1.05 (s, 9H), 1.90 (q,  $J = 7.2$  Hz, 2H), 2.43 (s, 3H), 3.73 (d,  $J = 16.4$  Hz, 1H), 3.85 (dd,  $J = 2.0, 9.2$  Hz, 1H), 3.89 (d,  $J = 16.4$  Hz, 1H), 3.98 (dd,  $J = 3.2, 16.4$  Hz, 1H), 4.26 (dd,  $J = 2.0, 16.4$  Hz, 1H), 5.77 (dd,  $J = 9.2, 16.0$  Hz, 1H), 6.41 (d,  $J = 16.0$  Hz, 1H), 7.20-7.35 (m, 7H), 7.69 (d,  $J = 8.0$  Hz, 2H);  $^{13}\text{C NMR}$  (100 MHz,  $\text{CDCl}_3$ )  $\delta$ : 12.5, 21.5, 23.3, 28.6, 34.3, 42.5, 46.9, 52.7, 117.2, 126.0, 127.1, 127.6, 128.5, 129.4, 129.9, 131.2, 132.3, 132.7, 135.3, 137.5, 143.2, 153.0; HRMS (ESI)  $m/z$  calcd for  $\text{C}_{28}\text{H}_{33}\text{N}_1\text{Na}_1\text{O}_2\text{S}_1^+$   $[\text{M}+\text{Na}]^+$  470.2130, found 470.2127; IR (ATR)  $\nu$ : 2961, 1598, 1342, 1158, 1091, 902, 660  $\text{cm}^{-1}$ ; yellow oil (88%, 30.7 mg)

**(E)-8-(tert-butyl)-5-isopropyl-7-styryl-3-tosyl-3-azabicyclo[4.2.0]octa-1(8),5-diene (3c)**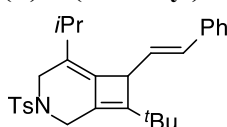

$^1\text{H NMR}$  (600 MHz,  $\text{CDCl}_3$ )  $\delta$ : 0.92 (d,  $J = 6.6$  Hz, 3H), 0.94 (d,  $J = 6.6$  Hz, 3H), 1.05 (s, 9H), 2.15-2.20 (m, 1H), 2.43 (s, 3H), 3.73 (d,  $J = 16.2$  Hz, 1H), 3.86 (d,  $J = 10.2$  Hz, 1H), 3.96 (d,  $J = 16.2$  Hz, 1H), 3.97 (d,  $J = 16.2$  Hz, 1H), 4.28 (d,  $J = 16.2$  Hz, 1H), 5.74 (dd,  $J = 10.2, 15.6$  Hz, 1H), 6.40 (d,  $J = 15.6$  Hz, 1H), 7.22 (t,  $J = 7.2$  Hz, 1H), 7.27-7.32 (m, 6H), 7.70 (d,  $J = 7.2$  Hz, 2H);  $^{13}\text{C NMR}$  (150 MHz,  $\text{CDCl}_3$ )  $\delta$ : 21.4, 21.5, 21.6, 28.6, 30.2, 34.3, 42.6, 45.6, 53.3, 121.7, 126.0, 127.1, 127.7, 128.5, 129.4, 130.1, 131.6, 132.0, 132.4, 135.6, 137.6, 143.2, 153.1; HRMS (ESI)  $m/z$  calcd for  $\text{C}_{29}\text{H}_{35}\text{N}_1\text{Na}_1\text{O}_2\text{S}_1^+$   $[\text{M}+\text{Na}]^+$  484.2286, found 484.2285; IR (ATR)  $\nu$ : 2960, 1448, 1343, 1159, 1092, 966, 814  $\text{cm}^{-1}$ ; pale yellow oil (88%, 40.4 mg)

**(E)-8-(tert-butyl)-7-(4-fluorostyryl)-5-isopropyl-3-tosyl-3-azabicyclo[4.2.0]octa-1(8),5-diene (3f)**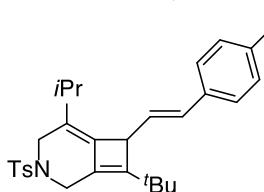

$^1\text{H NMR}$  (400 MHz,  $\text{CDCl}_3$ )  $\delta$ : 0.92 (d,  $J = 8.8$  Hz, 3H), 0.94 (d,  $J = 8.8$  Hz, 3H), 1.05 (s, 9H), 2.10-2.22 (m, 1H), 2.42 (s, 3H), 3.72 (d,  $J = 16.8$  Hz, 1H), 3.84 (d,  $J = 9.6$  Hz, 1H), 3.94 (d,  $J = 16.8$  Hz, 1H), 3.95 (d,  $J = 16.8$  Hz, 1H), 4.26 (d,  $J = 16.8$  Hz, 1H), 5.67 (dd,  $J = 9.6, 15.6$  Hz, 1H), 6.36 (d,  $J = 15.6$  Hz, 1H), 6.98 (d,  $J = 8.8$  Hz, 1H), 7.00 (d,  $J = 8.8$  Hz, 1H), 7.21-7.25 (m, 2H), 7.29 (d,  $J = 8.0$  Hz, 2H), 7.70 (d,  $J = 8.0$  Hz, 2H);  $^{13}\text{C NMR}$  (100 MHz,  $\text{CDCl}_3$ )  $\delta$ : 21.4, 21.5, 21.5, 28.6, 30.2, 34.3, 42.5, 45.6, 53.1, 115.4 ( $J = 21.0$  Hz), 121.7, 127.4 ( $J = 7.6$  Hz), 127.6, 128.8, 129.4, 131.4 ( $J = 1.9$  Hz), 131.9, 132.4, 133.7 ( $J = 2.9$  Hz), 135.4, 143.1, 153.0;  $^{19}\text{F NMR}$  (376 MHz,  $\text{CDCl}_3$ )  $\delta$ : -115.1; HRMS (ESI)  $m/z$  calcd for  $\text{C}_{29}\text{H}_{34}\text{F}_1\text{N}_1\text{Na}_1\text{O}_2\text{S}_1^+$   $[\text{M}+\text{Na}]^+$  502.2192, found 502.2205; IR (ATR)  $\nu$ : 2961, 1461, 1343, 1226, 1159, 1092, 967, 830  $\text{cm}^{-1}$ ; m.p. 49 °C; colorless amorphous (82%, 26.5 mg)

**(E)-8-(tert-butyl)-5-isopropyl-7-(4-methoxystyryl)-3-azabicyclo[4.2.0]octa-1(8),5-diene (3h)**

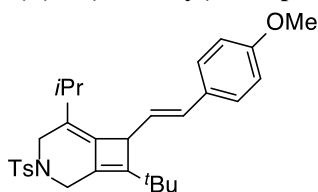

$^1\text{H NMR}$  (600 MHz,  $\text{CDCl}_3$ )  $\delta$ : 0.92 (d,  $J = 6.6$  Hz, 3H), 0.94 (d,  $J = 6.6$  Hz, 3H), 1.04 (s, 9H), 2.14-2.20 (m, 1H), 2.43 (s, 3H), 3.72 (d,  $J = 16.2$  Hz, 1H), 3.81 (s, 3H), 3.84 (dd,  $J = 3.0, 10.2$  Hz, 1H), 3.95 (d,  $J = 16.2$  Hz, 1H), 3.96 (d,  $J = 16.2$  Hz, 1H), 4.27 (d,  $J = 16.2$  Hz, 1H), 5.60 (dd,  $J = 10.2, 16.2$  Hz, 1H), 6.34 (d,  $J = 16.2$  Hz, 1H), 6.85 (d,  $J = 8.4$  Hz, 2H), 7.21 (d,  $J = 8.4$  Hz, 2H), 7.29 (d,  $J = 8.4$  Hz, 2H), 7.70 (d,  $J = 8.4$  Hz, 2H);  $^{13}\text{C NMR}$  (150 MHz,  $\text{CDCl}_3$ )  $\delta$ : 21.4, 21.5, 21.6, 28.6, 30.2, 34.3, 42.6, 45.6, 53.4, 55.3, 114.0, 121.4, 127.1, 127.7, 129.4, 129.4, 129.5, 130.4, 132.2, 132.2, 135.5, 143.1, 153.3, 158.8; HRMS (ESI)  $m/z$  calcd for  $\text{C}_{30}\text{H}_{37}\text{N}_1\text{Na}_1\text{O}_3\text{Si}_1^+$   $[\text{M}+\text{Na}]^+$  514.2392, found 514.2387; IR (ATR)  $\nu$ : 2959, 1511, 1464, 1343, 1250, 1160, 1092, 1032, 814  $\text{cm}^{-1}$ ; m.p. 156-157  $^\circ\text{C}$ ; colorless solid (70%, 8.8 mg)

**(E)-8-(tert-butyl)-5-isopropyl-7-styryl-3-oxabicyclo[4.2.0]octa-1(8),5-diene (3i)**

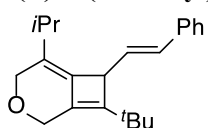

$^1\text{H NMR}$  (400 MHz,  $\text{CDCl}_3$ )  $\delta$ : 1.00 (d,  $J = 9.6$  Hz, 3H), 1.03 (d,  $J = 9.6$  Hz, 3H), 1.07 (s, 9H), 2.20-2.26 (m, 1H), 4.00-4.10 (m, 2H), 4.14-4.17 (m, 1H), 4.30 (dd,  $J = 3.2, 15.2$  Hz, 1H), 4.41 (d,  $J = 15.2$  Hz, 1H), 6.25 (ddd,  $J = 0.8, 10.0, 15.6$  Hz, 1H), 6.53 (d,  $J = 15.6$  Hz, 1H), 7.21 (t,  $J = 8.0$  Hz, 1H), 7.31 (dd,  $J = 7.6, 8.0$  Hz, 2H), 7.37 (d,  $J = 7.6$  Hz, 2H);  $^{13}\text{C NMR}$  (100 MHz,  $\text{CDCl}_3$ )  $\delta$ : 21.6, 21.7, 28.8, 29.7, 54.2, 62.5, 65.9, 125.1, 126.1, 127.0, 128.5, 129.9, 130.6, 132.3, 135.6, 137.7, 151.3; HRMS (ESI)  $m/z$  calcd for  $\text{C}_{23}\text{H}_{32}\text{Na}_1\text{O}_2^+$   $[\text{M}+\text{MeOH}+\text{Na}]^+$  363.2300, found 363.2301; IR (ATR)  $\nu$ : 3025, 2960, 1495, 1361, 1258, 965, 754, 694  $\text{cm}^{-1}$ ; pale yellow oil (70%, 34.9 mg). This product was purified by using NH silica gel column chromatography because of its unstability for normal silica gel.

Table S1: Catalyst Screening for [2+2] cycloaddition of **1c**

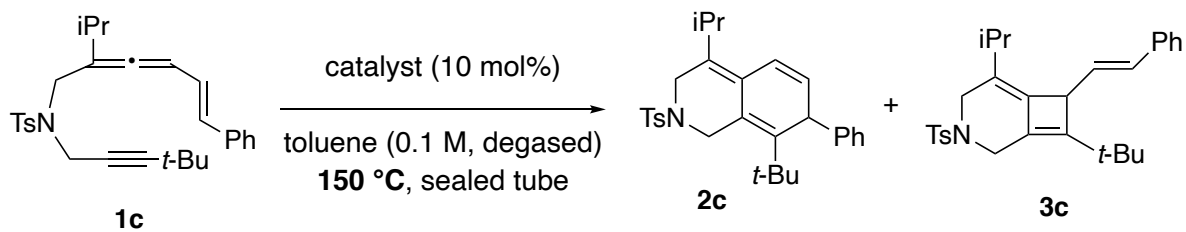

| entry | catalyst                                                                 | conditions                  | <b>2c</b> (%) | <b>3c</b> (%) |
|-------|--------------------------------------------------------------------------|-----------------------------|---------------|---------------|
| 1     | Ni[P(OPh) <sub>3</sub> ] <sub>4</sub>                                    | 15 min, under Ar            | quant         | 0             |
| 2     | Ni[P(OPh) <sub>3</sub> ] <sub>4</sub>                                    | 4.5 h, under O <sub>2</sub> | 0             | 18            |
| 3     | Ni[P(OPh) <sub>3</sub> ] <sub>4</sub> with PhCO <sub>2</sub> H (10 mol%) | 7 h, under Ar               | 15            | 34            |
| 4     | AcOH                                                                     | 6 h under Ar                | 0             | 45            |
| 5     | NiCl <sub>2</sub>                                                        | 6 h under Ar                | 0             | 52            |
| 6     | NiCl <sub>2</sub> ·6H <sub>2</sub> O                                     | 5 h, under Ar               | 0             | 45            |
| 7     | NiBr <sub>2</sub>                                                        | 4 h, under Ar               | 0             | 49            |
| 8     | NiF <sub>2</sub> ·4H <sub>2</sub> O                                      | 6 h, under Ar               | 0             | 88            |
| 9     | Ni(acac) <sub>2</sub>                                                    | 6 h under Ar                | 0             | 65            |
| 10    | Ni(OTf) <sub>2</sub>                                                     | 5 h under Ar                | 0             | 43            |
| 11    | CuCl                                                                     | 6 h under Ar                | 0             | 34            |
| 12    | AlCl <sub>3</sub>                                                        | 6 h under Ar                | 0             | 24            |
| 13    | Pd <sub>2</sub> (dba) <sub>3</sub>                                       | 6 h under Ar                | 0             | 64            |
| 14    | AuCl(PPh <sub>3</sub> ) <sub>3</sub>                                     | 6 h under Ar                | 0             | 78            |

## Substrate synthesis

### Synthesis of the conjugated allenene alcohol **S6**

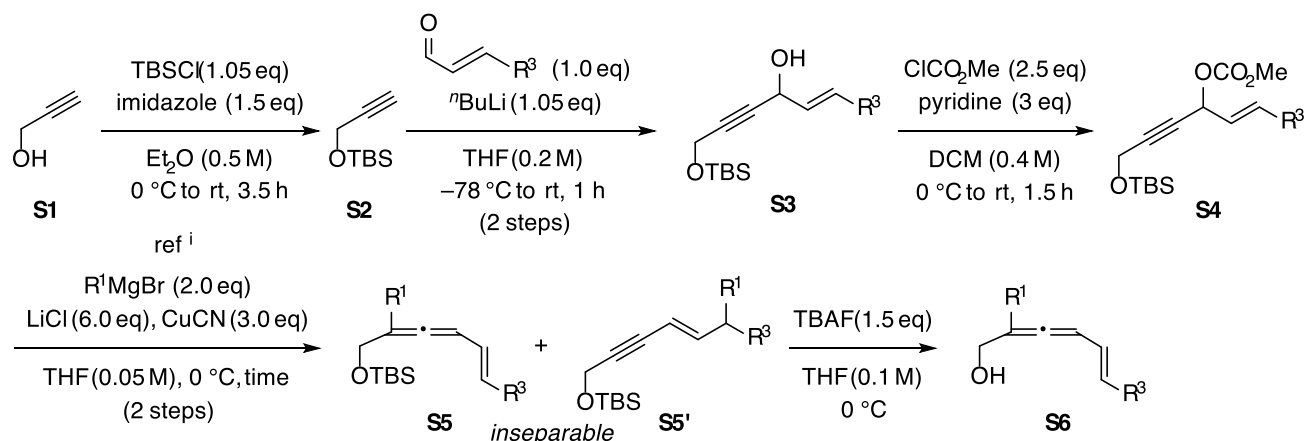

**S1** to **S2**: TBSCl (1.58 g, 10.5 mmol) and imidazole (1.02 g, 15 mmol) were added to a solution of propargyl alcohol **S1** (0.56 g, 10 mmol) in Et<sub>2</sub>O (20 mL) at 0 °C. The reaction mixture was warmed up to room temperature and stirred for 3.5 h. When the reaction was complete, it was quenched with saturated aqueous solution of NH<sub>4</sub>Cl and extracted with Et<sub>2</sub>O, dried over anhydrous Na<sub>2</sub>SO<sub>4</sub>. Then, the solvent was removed under residue pressure. The crude **S2** was used in the next step without further purification.

**S2** to **S3**: *n*-BuLi (6.77 mL, 1.55 M in hexanes, 10.5 mmol) was added to a solution of crude **S2** (1.70 g, 10 mmol) in THF (50 mL) dropwise at -78 °C under argon. After being stirred for 0.5 h at the same temperature, corresponding aldehyde (10 mmol) was added dropwise, then it was allowed to warm up to room temperature and stirred for 1 h. When the reaction was complete, it was quenched with saturated aqueous solution of NH<sub>4</sub>Cl, extracted with THF and dried over anhydrous Na<sub>2</sub>SO<sub>4</sub>. The organic phase was concentrated under reduced pressure and the residue was purified by column chromatography on silica gel (*n*-Hexane/AcOEt = 20/1-5/1) to afford corresponding **S3** as pale yellow oil.

**S3** to **S4**: Methyl chloroformate (1.86 g, 20.0 mmol) was added dropwise to a solution of corresponding alcohol **S3** (7.98 mmol) and pyridine (1.93 mL, 23.9 mmol) in DCM (20 mL) at 0 °C. The reaction mixture was warmed up to room temperature and stirred for 1.5 h. It was quenched with saturated aqueous solution of NH<sub>4</sub>Cl and extracted with DCM, dried over anhydrous Na<sub>2</sub>SO<sub>4</sub>. Then, the solvent was removed under residue pressure. The crude **S4** was used in the next step without further purification. **S5** was sensitive for air and unstable for normal silica gel column chromatography. It should be used for next step immediately.

**S4** to **S5**<sup>ref i</sup>: To a stirred suspension of LiCl (2.03 g, 47.9 mmol) and CuCN (2.14 g, 23.9 mmol) in THF (80 mL) at 0 °C was slowly added a solution of R<sup>2</sup>MgBr (16.0 mmol, 2.0 or 3.0 M in Et<sub>2</sub>O) under argon. After the mixture was stirred for 0.5 h, a solution of **S4** (7.98 mmol) in THF (80 mL) was added. The reaction mixture was stirred for 1 h at 0 °C, and then a saturated aqueous solution of NH<sub>4</sub>Cl was added. The organic layer was extracted with AcOEt, dried over (Na<sub>2</sub>SO<sub>4</sub>), concentrated *in vacuo*, and purified by flash column chromatography (eluting with *n*-Hexane), corresponding **S5** was obtained (with inseparable corresponding byproduct **S5'** frequently).

**S5** to **S6**: Tetrabutylammonium fluoride (4.37 mL, 1.0 M in THF, 4.37 mmol) was added to a solution of **S5** (3.64 mmol) in THF (18 mL) dropwise at 0 °C under argon. The reaction mixture was stirred for 1 h at 0 °C, and then a saturated solution of NH<sub>4</sub>Cl was added and the reaction was extracted with AcOEt. After drying (Na<sub>2</sub>SO<sub>4</sub>),



concentration, and flash column chromatography (*n*-Hexane/AcOEt = 15/1-8/1), corresponding **S6** was obtained as pale yellow oil.

**(E)-6-((tert-butyldimethylsilyl)oxy)-1-phenylhex-1-en-4-yn-3-ol (S3a)**

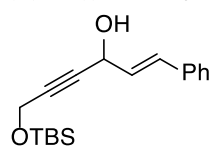

<sup>1</sup>H NMR (400MHz, CDCl<sub>3</sub>) δ: 0.08 (d, *J* = 3.6 Hz, 6H), 0.90 (s, 9H), 1.05 (t, *J* = 7.6 Hz, 3H), 2.09 (ddt, *J* = 2.8, 7.6, 14.4 Hz, 2H), 4.91 (d, *J* = 2.8 Hz, 2H), 6.08 (dt, *J* = 2.8, 2.8, 10.0 Hz, 1H), 6.48 (d, *J* = 16.0 Hz, 1H), 6.61 (dd, *J* = 10.0, 16.0 Hz, 1H), 7.18-7.38 (m, 5H); <sup>13</sup>C NMR (100 MHz, CDCl<sub>3</sub>) δ: -5.3, 12.1, 18.3, 22.2, 25.9, 64.2, 96.8, 125.6, 126.1, 127.1, 128.5, 129.8, 137.4, 204.8; ; HRMS (ESI) *m/z* calcd for C<sub>18</sub>H<sub>25</sub>Na<sub>1</sub>O<sub>2</sub>Si<sub>1</sub><sup>+</sup> [M+Na]<sup>+</sup> 325.1600, found 325.1605; IR (ATR) *v*: 3339, 3028, 2119, 1254, 964, 834, 692 cm<sup>-1</sup>; yellow oil (53% for 2 steps)

**(E)-6-((tert-butyldimethylsilyl)oxy)-1-(4-methoxyphenyl)hex-1-en-4-yn-3-ol (S3b)**

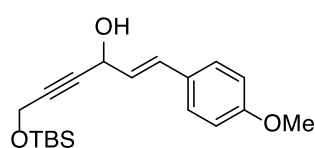

<sup>1</sup>H NMR (400 MHz, CDCl<sub>3</sub>) δ: 0.14 (s, 6H), 0.92 (s, 9H), 1.92 (dd, *J* = 2.4, 6.0 Hz, 1H), 3.81 (s, 3H), 4.41 (d, *J* = 2.4 Hz, 2H), 5.07 (dd, *J* = 6.0, 6.0 Hz, 1H), 6.16 (dd, *J* = 6.0, 16.0 Hz, 1H), 6.71 (d, *J* = 16.0 Hz, 1H), 6.86 (d, *J* = 8.8 Hz, 2H), 7.34 (d, *J* = 8.8 Hz, 2H); <sup>13</sup>C NMR (100 MHz, CDCl<sub>3</sub>) δ: -5.2, 18.2, 25.8, 51.7, 55.2, 63.0, 83.8, 84.9, 113.9, 125.7, 127.9, 128.7, 131.4, 159.5; HRMS (ESI) *m/z* calcd for C<sub>19</sub>H<sub>28</sub>Na<sub>1</sub>O<sub>3</sub>Si<sub>1</sub><sup>+</sup> [M+Na]<sup>+</sup> 355.1705, found 355.1715; IR (ATR) *v*: 3257, 2117, 1652, 1463, 1250, 1174, 1081, 965, 834 cm<sup>-1</sup>; yellow gum (24% for 2 steps from **S1**)

**(E)-6-((tert-butyldimethylsilyl)oxy)-1-(4-fluorophenyl)hex-1-en-4-yn-3-ol (S3c)**

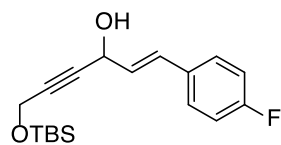

<sup>1</sup>H NMR (400 MHz, CDCl<sub>3</sub>) δ: 0.14 (s, 6H), 0.92 (s, 9H), 1.97 (d, *J* = 5.6 Hz, 1H), 4.41 (t, *J* = 1.6 Hz, 2H), 5.05-5.11 (m, 1H), 6.21 (dd, *J* = 10.0, 16.0 Hz, 1H), 6.74 (d, *J* = 16.0 Hz, 1H), 7.01 (d, *J* = 8.0 Hz, 1H), 7.03 (d, *J* = 8.0 Hz, 1H), 7.36 (d, *J* = 8.0 Hz, 1H), 7.38 (d, *J* = 8.0 Hz, 1H); <sup>13</sup>C NMR (100 MHz, CDCl<sub>3</sub>) δ: -5.2, 18.3, 25.8, 51.7, 62.8, 83.6, 85.2, 115.5 (d, *J* = 21.0 Hz), 127.7, 128.3 (d, *J* = 7.6 Hz), 130.6, 132.2 (d, *J* = 2.8 Hz), 162.5 (d, *J* = 245.0 Hz); <sup>19</sup>F NMR (376 MHz, CDCl<sub>3</sub>) δ: -113.5; HRMS (ESI) *m/z* calcd for C<sub>18</sub>H<sub>25</sub>F<sub>1</sub>Na<sub>1</sub>O<sub>2</sub>Si<sub>1</sub><sup>+</sup> [M+Na]<sup>+</sup> 343.1506, found 343.1492; IR (ATR) *v*: 3370, 1509, 1255, 1231, 1158, 1084, 968, 835 cm<sup>-1</sup>; yellow oil (78% for 2steps from **S1**)

**7-((tert-butyldimethylsilyl)oxy)-2-methylhept-2-en-5-yn-4-ol (S3d)**

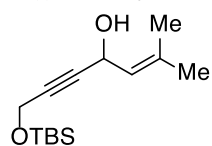

<sup>1</sup>H NMR (400 MHz, CDCl<sub>3</sub>) δ: 0.12 (s, 6H), 0.91 (s, 9H), 1.72 (d, *J* = 1.6 Hz, 3H), 1.73 (bd, *J* = 1.6 Hz, 1H), 1.75 (d, *J* = 1.6 Hz, 3H), 4.35 (d, *J* = 1.6 Hz, 2H), 5.10 (ddd, *J* = 8.4, 2.4, 1.6 Hz, 1H), 5.36 (ddd, *J* = 8.4, 1.6, 1.6 Hz, 2H), 7.74 (d, *J* = 8.4 Hz, 2H); <sup>13</sup>C NMR (100 MHz, CDCl<sub>3</sub>) δ: -5.2, 18.0, 18.2, 25.5, 25.7, 51.7, 59.0, 83.0, 85.3, 124.6, 136.6; HRMS (ESI) *m/z* calcd for C<sub>14</sub>H<sub>26</sub>Na<sub>1</sub>O<sub>2</sub>Si<sub>1</sub><sup>+</sup> [M+Na]<sup>+</sup> 277.1600, found 277.1593; IR (ATR) *v*: 3357, 2120, 1254, 998, 833, 664 cm<sup>-1</sup>; yellow oil (75% for 2 steps)

**(E)-tert-butyldimethyl((2-methyl-6-phenylhexa-2,3,5-trien-1-yl)oxy)silane (S5a)**

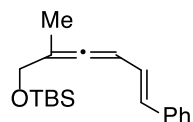

<sup>1</sup>H NMR (400MHz, CDCl<sub>3</sub>) δ: 0.08 (s, 3H), 0.09 (s, 3H), 0.91 (s, 9H), 3.81 (s, 3H), 4.15 (d, *J* = 2.4 Hz, 2H), 5.92-5.98 (m, 1H), 6.40-6.50 (m, 2H), 6.84 (d, *J* = 9.2 Hz, 2H), 7.28-7.31 (m, 3H); <sup>13</sup>C NMR (100 MHz, CDCl<sub>3</sub>) δ: -5.2, -5.1, 15.5, 18.3, 25.9, 65.1, 95.0, 101.4, 125.5, 126.1, 127.2, 128.5, 130.0, 137.4, 205.2; HRMS (ESI) *m/z* calcd for C<sub>19</sub>H<sub>28</sub>Na<sub>1</sub>O<sub>1</sub>Si<sub>1</sub><sup>+</sup> [M+Na]<sup>+</sup> 323.1807, found 323.1811; IR (ATR) *v*: 2856, 1947, 1462, 1254, 1072, 963, 836, 690 cm<sup>-1</sup>; pale yellow oil (51% for 2 steps)

**(E)-tert-butyl((2-ethyl-6-phenylhexa-2,3,5-trien-1-yl)oxy)dimethylsilane (S5b)**

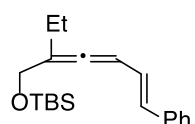

$^1\text{H NMR}$  (400MHz,  $\text{CDCl}_3$ )  $\delta$ : 0.07 (s, 3H), 0.08 (s, 3H), 0.90 (s, 9H), 1.05 (t,  $J = 7.6$  Hz, 3H), 2.09 (ddt,  $J = 2.8, 7.6, 14.4$  Hz, 2H), 4.91 (d,  $J = 2.8$  Hz, 2H), 6.08 (dt,  $J = 2.8, 2.8, 10.0$  Hz, 1H), 6.48 (d,  $J = 16.0$  Hz, 1H), 6.61 (dd,  $J = 10.0, 16.0$  Hz, 1H), 7.18-7.38 (m, 5H);  $^{13}\text{C NMR}$  (100 MHz,  $\text{CDCl}_3$ )  $\delta$ : -5.3, 12.1, 18.3, 22.2, 25.9, 64.2, 96.8, 125.6, 126.1, 127.1, 128.5, 129.8, 137.4, 204.8; IR (ATR) v: 2929, 2856, 1942, 1254, 1073, 837, 744  $\text{cm}^{-1}$ ; pale yellow oil (98% for 2 steps from **S3a**)

**(E)-tert-butyl((2-isopropyl-6-phenylhexa-2,3,5-trien-1-yl)oxy)dimethylsilane (S5c)**

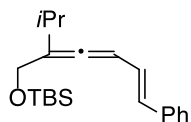

$^1\text{H NMR}$  (400MHz,  $\text{CDCl}_3$ )  $\delta$ : 0.07 (s, 3H), 0.08 (s, 3H), 0.90 (s, 9H), 1.06 (d,  $J = 6.8$  Hz, 3H), 1.08 (d,  $J = 6.8$  Hz, 3H), 2.32-2.39 (m, 1H), 4.23 (d,  $J = 2.4$  Hz, 2H), 6.07-6.12 (m, 1H), 6.48 (d,  $J = 16.0$  Hz, 1H), 6.59 (dd,  $J = 10.4, 16.0$  Hz, 1H), 7.20 (t,  $J = 7.2$  Hz, 1H), 7.30 (dd,  $J = 6.8, 7.2$  Hz, 2H), 7.37 (d,  $J = 6.8$  Hz, 2H);  $^{13}\text{C NMR}$  (100 MHz,  $\text{CDCl}_3$ )  $\delta$ : -5.2, 12.4, 21.7, 22.0, 25.9, 27.9, 63.1, 97.4, 113.0, 125.9, 126.1, 127.1, 128.5, 129.7, 137.5, 204.4; pale yellow oil (76% for 2 steps from **S3a**, 806.6 mg)

**(E)-tert-butyl((6-(4-methoxyphenyl)-2-methylhexa-2,3,5-trien-1-yl)oxy)dimethylsilane (S5d)**

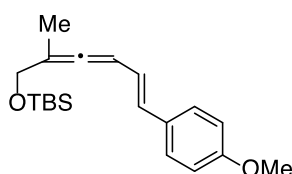

$^1\text{H NMR}$  (400 MHz,  $\text{CDCl}_3$ )  $\delta$ : 0.08 (s, 3H), 0.09 (s, 3H), 0.90 (s, 9H), 1.76 (d,  $J = 2.8$  Hz, 3H), 3.80 (s, 3H), 4.15 (d,  $J = 2.8$  Hz, 2H), 5.93-5.99 (m, 1H), 6.40-6.50 (m, 2H), 6.84 (d,  $J = 8.8$  Hz, 2H), 7.30 (d,  $J = 8.8$  Hz, 2H);  $^{13}\text{C NMR}$  (100 MHz,  $\text{CDCl}_3$ )  $\delta$ : -5.2, 15.6, 18.4, 25.9, 55.2, 65.2, 95.0, 101.3, 114.0, 123.3, 127.3, 129.5, 130.3, 158.9, 204.8; HRMS (ESI)  $m/z$  calcd for  $\text{C}_{40}\text{H}_{60}\text{Na}_1\text{O}_4\text{Si}_2^+$  [ $2\text{M}+\text{Na}$ ] $^+$  683.3928, found 683.3913; IR (ATR) v: 2927, 1946, 1606, 1510, 1389, 1173, 834, 775  $\text{cm}^{-1}$ ; pale yellow oil (76% for 2 steps from **S3b**)

**(E)-tert-butyl((2-ethyl-6-(4-methoxyphenyl)hexa-2,3,5-trien-1-yl)oxy)dimethylsilane (S5e)**

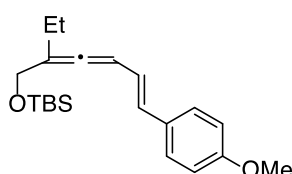

$^1\text{H NMR}$  (400 MHz,  $\text{CDCl}_3$ )  $\delta$ : 0.07 (s, 3H), 0.08 (s, 3H), 0.90 (s, 9H), 1.04 (t,  $J = 7.6$  Hz, 3H), 2.07-2.10 (m, 2H), 3.80 (s, 3H), 4.19 (d,  $J = 2.4$  Hz, 2H), 6.05-6.07 (m, 1H), 6.41-6.51 (m, 2H), 6.84 (d,  $J = 8.8$  Hz, 2H), 7.30 (d,  $J = 8.8$  Hz, 2H);  $^{13}\text{C NMR}$  (100 MHz,  $\text{CDCl}_3$ )  $\delta$ : -5.2, 12.1, 18.4, 22.2, 25.9, 55.2, 64.4, 96.9, 108.1, 114.0, 123.5, 127.3, 129.3, 130.3, 158.9, 204.4; HRMS (ESI)  $m/z$  calcd for  $\text{C}_{42}\text{H}_{64}\text{Na}_1\text{O}_4\text{Si}_2^+$  [ $2\text{M}+\text{Na}$ ] $^+$  711.4241, found 711.4219; IR (ATR) v: 2928, 1943, 1606, 1510, 1389, 1173, 834, 775  $\text{cm}^{-1}$ ; pale yellow oil (85% for 2 steps from **S3b**)

**(E)-tert-butyl((2-isopropyl-6-(4-methoxyphenyl)hexa-2,3,5-trien-1-yl)oxy)dimethylsilane (S45)**

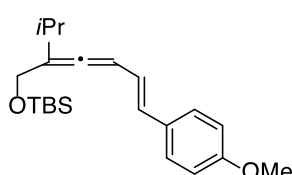

$^1\text{H NMR}$  (400 MHz,  $\text{CDCl}_3$ )  $\delta$ : 0.07 (s, 3H), 0.08 (s, 3H), 0.90 (s, 9H), 1.06 (d,  $J = 6.8$  Hz, 3H), 1.08 (d,  $J = 6.8$  Hz, 3H), 2.30-2.38 (m, 1H), 3.81 (s, 3H), 4.23 (d,  $J = 2.4$  Hz, 2H), 6.05-6.09 (m, 1H), 6.40-6.50 (m, 2H), 6.84 (d,  $J = 8.4$  Hz, 2H), 7.31 (d,  $J = 8.4$  Hz, 2H);  $^{13}\text{C NMR}$  (100 MHz,  $\text{CDCl}_3$ )  $\delta$ : -5.3, 18.3, 21.7, 22.0, 25.9, 27.9, 55.2, 63.1, 97.4, 112.8, 114.0, 123.6, 127.2, 129.2, 130.3, 158.9, 203.9; HRMS (ESI)  $m/z$  calcd for  $\text{C}_{22}\text{H}_{34}\text{Na}_1\text{O}_2\text{Si}_1^+$  [ $\text{M}+\text{Na}$ ] $^+$  381.2226, found 381.2231; IR (ATR) v: 2956, 2928, 2856, 1939, 1510, 1362, 1251, 959, 835, 671  $\text{cm}^{-1}$ ; pale yellow oil (34% for 2 steps from **S3b**)

**(E)-tert-butyl((2-ethyl-6-(4-fluorophenyl)hexa-2,3,5-trien-1-yl)oxy)dimethylsilane (S5g)**

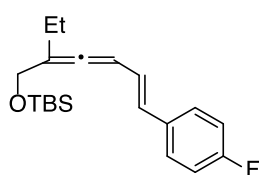

$^1\text{H NMR}$  (400 MHz,  $\text{CDCl}_3$ )  $\delta$ : 0.08 (s, 3H), 0.08 (s, 3H), 0.90 (s, 9H), 1.05 (t,  $J = 7.6$  Hz, 3H), 2.05-2.14 (m, 2H), 4.19 (d,  $J = 2.4$  Hz, 2H), 6.02-6.08 (m, 1H), 6.44 (d,  $J = 15.6$  Hz, 1H), 6.52 (dd,  $J = 9.6, 15.6$  Hz, 1H), 6.97-7.02 (m, 2H), 7.31-7.36 (m, 2H);  $^{13}\text{C NMR}$  (100 MHz,  $\text{CDCl}_3$ )  $\delta$ : -5.3, 12.1, 18.3, 22.2, 25.9, 64.2, 96.7, 108.3, 115.4 (d,  $J = 22.0$  Hz), 125.5, 127.5 (d,  $J = 7.7$  Hz), 128.5, 133.6 (d,  $J = 2.8$  Hz), 162.0 (d,  $J = 245.4$  Hz), 204.8;  $^{19}\text{F NMR}$

(376 MHz, CDCl<sub>3</sub>)  $\delta$ : -114.8; HRMS (ESI)  $m/z$  calcd for C<sub>40</sub>H<sub>58</sub>F<sub>2</sub>Na<sub>1</sub>O<sub>2</sub>Si<sub>2</sub><sup>+</sup> [2M+Na]<sup>+</sup> 687.3841, found 687.3849; IR (ATR)  $\nu$ : 2957, 2929, 1943, 1601, 1508, 1229, 1157, 836 cm<sup>-1</sup>; colorless oil (71% for 2 steps from **S3c**)

**(E)-tert-butyl((6-(4-fluorophenyl)-2-isopropylhexa-2,3,5-trien-1-yl)oxy)dimethylsilane (S5h)**

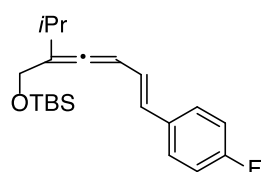

<sup>1</sup>H NMR (400 MHz, CDCl<sub>3</sub>)  $\delta$ : 0.07 (s, 3H), 0.08 (s, 3H), 0.90 (s, 9H), 1.06 (d,  $J$  = 6.8 Hz, 3H), 1.08 (d,  $J$  = 6.8 Hz, 3H), 2.33-2.37 (m, 1H), 4.23 (d,  $J$  = 2.4 Hz, 2H), 6.05-6.10 (m, 1H), 6.44 (d,  $J$  = 15.6 Hz, 1H), 6.50 (dd,  $J$  = 9.2, 15.6 Hz, 1H), 6.96-7.02 (m, 2H), 7.30-7.35 (m, 2H); <sup>13</sup>C NMR (100 MHz, CDCl<sub>3</sub>)  $\delta$ : -5.3, 18.3, 21.7, 22.0, 25.9, 27.9, 63.0, 97.2, 113.0, 115.4 (d,  $J$  = 21.1 Hz), 125.6 (d,  $J$  = 1.9 Hz), 127.5 (d,  $J$  = 7.7 Hz), 128.4, 133.7 (d,

$J$  = 2.9 Hz), 162.5 (d,  $J$  = 245.3 Hz), 204.4; <sup>19</sup>F NMR (376 MHz, CDCl<sub>3</sub>)  $\delta$ : -114.9; HRMS (ESI)  $m/z$  calcd for C<sub>42</sub>H<sub>62</sub>F<sub>2</sub>Na<sub>1</sub>O<sub>2</sub>Si<sub>2</sub><sup>+</sup> [2M+Na]<sup>+</sup> 715.4154, found 715.4129; IR (ATR)  $\nu$ : 2958, 2928, 1942, 1602, 1230, 1157, 837 cm<sup>-1</sup>; colorless oil (63% for 2 steps from **S3c**)

**tert-butyl((2-ethyl-6-methylhepta-2,3,5-trien-1-yl)oxy)dimethylsilane (S5i)**

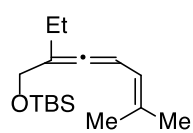

<sup>1</sup>H NMR (400 MHz, CDCl<sub>3</sub>)  $\delta$ : 0.06 (s, 3H), 0.07 (s, 3H), 0.90 (s, 9H), 1.01 (t,  $J$  = 7.2 Hz, 3H), 2.05 (dq,  $J$  = 7.2, 3.2 Hz, 3H), 4.15 (d,  $J$  = 2.0 Hz, 2H), 5.61 (dt,  $J$  = 11.2, 2.0 Hz, 1H), 6.03-6.09 (m, 1H); <sup>13</sup>C NMR (100 MHz, CDCl<sub>3</sub>)  $\delta$ : -5.3, -5.2, 12.2, 18.0, 18.4, 22.2, 25.9, 26.0, 64.6, 92.5, 107.1, 120.3, 133.4, 203.3; HRMS (ESI)  $m/z$  calcd for C<sub>16</sub>H<sub>31</sub>O<sub>1</sub>Si<sub>1</sub><sup>+</sup> [M+H]<sup>+</sup> 267.2144, found

267.2149; IR (ATR)  $\nu$ : 2958, 2928, 1650, 1253, 940, 835, 665 cm<sup>-1</sup>; colorless oil (66% for 2 steps from **S3d**)

**(E)-2-methyl-6-phenylhexa-2,3,5-trien-1-ol (S6a)**

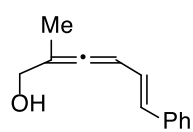

<sup>1</sup>H NMR (400 MHz, CDCl<sub>3</sub>)  $\delta$ : 1.52 (bs, 1 H), 1.79 (d,  $J$  = 2.8 Hz, 3H), 4.05-4.13 (m, 2H), 6.11-6.15 (m, 1H), 6.51 (d,  $J$  = 16.0 Hz, 1H), 6.6 (dd,  $J$  = 10.0, 16.0 Hz, 1H), 7.21 (t,  $J$  = 7.6 Hz, 1H), 7.30 (dd,  $J$  = 7.6, 7.6 Hz, 2H), 7.37 (d,  $J$  = 7.6 Hz, 2H); <sup>13</sup>C NMR (100 MHz, CDCl<sub>3</sub>)  $\delta$ : 15.6, 63.8, 97.0, 102.2, 125.0, 126.2, 127.4, 128.5, 130.7, 137.1, 203.8; HRMS (ESI)  $m/z$  calcd for C<sub>13</sub>H<sub>15</sub>O<sub>1</sub><sup>+</sup>

[M+H]<sup>+</sup> 187.1123, found 187.1124; IR (ATR)  $\nu$ : 3332, 1945, 1446, 1263, 1009, 961, 744, 690 cm<sup>-1</sup>; pale yellow oil (82%)

**(E)-2-ethyl-6-phenylhexa-2,3,5-trien-1-ol (S6b)**

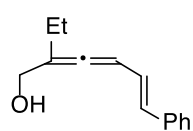

<sup>1</sup>H NMR (400 MHz, CDCl<sub>3</sub>)  $\delta$ : 1.07 (t,  $J$  = 7.2 Hz, 3H), 1.50 (t,  $J$  = 5.2 Hz, 1 H), 2.09 (m, 2H), 4.11 (dd,  $J$  = 2.8, 12.8 Hz, 1H), 4.15 (dd,  $J$  = 2.8, 12.8 Hz, 1H), 6.23 (dtt,  $J$  = 2.8, 2.8, 10.0 Hz, 1H), 6.53 (d,  $J$  = 15.6 Hz, 1H), 6.61 (dd,  $J$  = 10.0, 15.6 Hz, 1H), 7.21 (t,  $J$  = 8.0 Hz, 1H), 7.31 (dd,  $J$  = 8.0, 8.0 Hz, 2H), 7.38 (d,  $J$  = 8.0 Hz, 2H); <sup>13</sup>C NMR (100 MHz, CDCl<sub>3</sub>)  $\delta$ : 12.0, 22.5, 62.9,

98.7, 109.1, 125.2, 126.1, 127.3, 128.5, 130.5, 137.1, 203.4; HRMS (ESI)  $m/z$  calcd for C<sub>28</sub>H<sub>32</sub>Na<sub>1</sub>O<sub>2</sub><sup>+</sup> [2M+Na]<sup>+</sup> 423.2300, found 423.2307; IR (ATR)  $\nu$ : 3320, 2964, 1942, 1451, 1013, 961, 746 cm<sup>-1</sup>; colorless oil (99%)

**(E)-2-isopropyl-6-phenylhexa-2,3,5-trien-1-ol (S6c)**

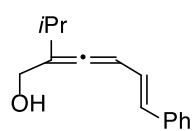

<sup>1</sup>H NMR (400 MHz, CDCl<sub>3</sub>)  $\delta$ : 1.09 (d,  $J$  = 6.8 Hz, 3H), 1.11 (d,  $J$  = 6.8 Hz, 3H), 1.47 (brt,  $J$  = 6.0 Hz, 1H), 2.25-2.36 (m, 1H), 4.13-4.18 (m, 2H), 6.22-6.27 (m, 1H), 6.53 (d,  $J$  = 15.6 Hz, 1H), 6.60 (dd,  $J$  = 9.6, 15.6 Hz, 1H), 7.21 (t,  $J$  = 7.2 Hz, 1H), 7.30 (dd,  $J$  = 7.2, 8.0 Hz, 2H), 7.38 (d,  $J$  = 8.0 Hz, 2H); <sup>13</sup>C NMR (100 MHz, CDCl<sub>3</sub>)  $\delta$ : -3.6, 21.7, 21.9, 25.6, 28.7, 61.7, 99.6, 114.1, 125.3,

126.2, 127.3, 128.5, 130.6, 137.2, 202.6; HRMS (ESI)  $m/z$  calcd for C<sub>30</sub>H<sub>37</sub>Na<sub>1</sub>O<sub>2</sub><sup>+</sup> [2M+Na]<sup>+</sup> 451.2613, found 451.2602; IR (ATR)  $\nu$ : 3346, 2960, 1938, 1496, 1383, 1012, 959, 746, 656 cm<sup>-1</sup>; m.p. 51-52 °C; colorless solid (66%)

**(E)-6-(4-methoxyphenyl)-2-methylhexa-2,3,5-trien-1-ol (S6d)**

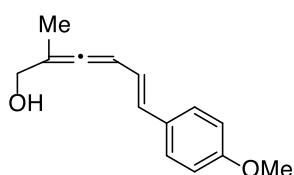

$^1\text{H NMR}$  (400 MHz,  $\text{CDCl}_3$ )  $\delta$ : 1.52 (bt,  $J = 4.0$  Hz, 1H), 1.78 (d,  $J = 2.8$  Hz, 3H), 3.81 (s, 3H), 4.06-4.12 (m, 2H), 6.09-6.17 (m, 1H), 6.42-6.50 (m, 2H), 6.85 (d,  $J = 9.2$  Hz, 2H), 7.32 (d,  $J = 9.2$  Hz, 2H);  $^{13}\text{C NMR}$  (100 MHz,  $\text{CDCl}_3$ )  $\delta$ : 15.6, 55.2, 63.8, 97.2, 102.1, 113.9, 122.8, 127.3, 120.0, 130.3, 159.0, 203.2; HRMS (ESI)  $m/z$  calcd for  $\text{C}_{28}\text{H}_{32}\text{Na}_1\text{O}_4^+$   $[2\text{M}+\text{Na}]^+$  450.1807, found 450.1803; IR (ATR)  $\nu$ : 3347, 2913, 1944, 1604, 1510, 1463, 1246, 803  $\text{cm}^{-1}$ ; yellow gum (95%)

**(E)-2-ethyl-6-(4-methoxyphenyl)hexa-2,3,5-trien-1-ol (S6e)**

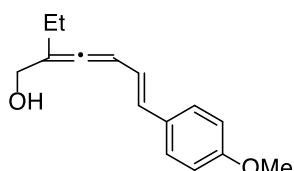

$^1\text{H NMR}$  (400 MHz,  $\text{CDCl}_3$ )  $\delta$ : 1.07 (t,  $J = 7.6$  Hz, 3H), 1.52 (bs, 1H), 2.05-2.14 (m, 2H), 3.81 (s, 3H), 4.08-4.15 (m, 2H), 6.19-6.26 (m, 1H), 6.43-6.56 (m, 2H), 6.85 (d,  $J = 8.8$  Hz, 2H), 7.32 (d,  $J = 8.8$  Hz, 2H);  $^{13}\text{C NMR}$  (100 MHz,  $\text{CDCl}_3$ )  $\delta$ : 12.1, 22.5, 55.2, 63.0, 99.1, 109.1, 114.0, 123.0, 127.3, 130.0, 130.1, 159.0, 202.8; HRMS (ESI)  $m/z$  calcd for  $\text{C}_{30}\text{H}_{36}\text{Na}_1\text{O}_4^+$   $[2\text{M}+\text{Na}]^+$  483.2511, found 483.2491; IR (ATR)  $\nu$ : 3335, 2963, 1940, 1739, 1604, 1510, 1456, 1248, 962, 804  $\text{cm}^{-1}$ ; yellow gum (95%)

**(E)-2-isopropyl-6-(4-methoxyphenyl)hexa-2,3,5-trien-1-ol (S6f)**

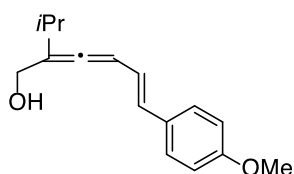

$^1\text{H NMR}$  (400 MHz,  $\text{CDCl}_3$ )  $\delta$ : 1.08 (d,  $J = 6.4$  Hz, 3H), 1.12 (d,  $J = 6.4$  Hz, 3H), 1.46 (t,  $J = 6.0$  Hz, 1H), 2.25-2.36 (m, 1H), 3.81 (s, 3H), 4.10-4.21 (m, 2H), 6.22-6.26 (m, 1H), 6.42-6.51 (m, 2H), 6.85 (d,  $J = 8.8$  Hz, 2H), 7.32 (d,  $J = 8.8$  Hz, 2H);  $^{13}\text{C NMR}$  (100 MHz,  $\text{CDCl}_3$ )  $\delta$ : 21.7, 21.0, 28.7, 55.2, 61.7, 99.8, 113.8, 113.9, 123.0, 127.3, 130.0, 130.1, 159.0, 202.1; HRMS (ESI)  $m/z$  calcd for  $\text{C}_{32}\text{H}_{40}\text{Na}_1\text{O}_4^+$   $[2\text{M}+\text{Na}]^+$  511.2824, found 511.2837; IR (ATR)  $\nu$ : 3397, 2960, 1938, 1511, 1383, 1250, 1174, 1032, 963, 803  $\text{cm}^{-1}$ ; yellow oil (90%)

**(E)-2-ethyl-6-(4-fluorophenyl)hexa-2,3,5-trien-1-ol (S6g)**

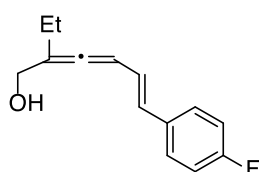

$^1\text{H NMR}$  (400 MHz,  $\text{CDCl}_3$ )  $\delta$ : 1.07 (t,  $J = 7.6$  Hz, 3H), 1.49-1.53 (m, 1H), 2.05-2.13 (m, 2H), 4.07-4.17 (m, 2H), 6.17-6.23 (m, 1H), 6.46-6.56 (m, 2H), 6.97-7.02 (m, 2H), 7.32-7.37 (m, 2H);  $^{13}\text{C NMR}$  (100 MHz,  $\text{CDCl}_3$ )  $\delta$ : 12.0, 22.5, 62.9, 98.6, 109.2, 115.4 (d,  $J = 21.9$  Hz), 125.0, 127.6 (d,  $J = 7.7$  Hz), 129.2, 133.3 (d,  $J = 2.9$  Hz), 162.0 (d,  $J = 246.0$  Hz), 203.4;  $^{19}\text{F NMR}$  (376 MHz,  $\text{CDCl}_3$ )  $\delta$ : -114.4; HRMS (ESI)  $m/z$  calcd for  $\text{C}_{14}\text{H}_{15}\text{F}_1\text{Na}_1\text{O}_1^+$   $[\text{M}+\text{Na}]^+$  241.1005, found 241.1006; IR (ATR)  $\nu$ : 3330, 2966, 1941, 1600, 1508, 1456, 962, 805  $\text{cm}^{-1}$ ; yellow oil (31%)

**(E)-6-(4-fluorophenyl)-2-isopropylhexa-2,3,5-trien-1-ol (S6h)**

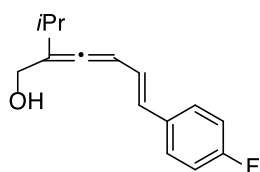

$^1\text{H NMR}$  (400 MHz,  $\text{CDCl}_3$ )  $\delta$ : 1.09 (d,  $J = 6.4$  Hz, 3H), 1.10 (d,  $J = 6.4$  Hz, 3H), 1.46 (t,  $J = 6.0$  Hz, 1H), 2.25-2.34 (m, 1H), 4.11-4.22 (m, 2H), 6.19-6.25 (m, 1H), 6.46-6.55 (m, 2H), 6.97-7.02 (m, 2H), 7.32-7.36 (m, 2H);  $^{13}\text{C NMR}$  (100 MHz,  $\text{CDCl}_3$ )  $\delta$ : 21.5, 21.8, 28.4, 61.5, 98.9, 113.8, 115.3 (d,  $J = 21.9$  Hz), 125.0, 127.5 (d,  $J = 8.6$  Hz), 129.0, 133.3, 161.9 (d,  $J = 245.9$  Hz), 202.9;  $^{19}\text{F NMR}$  (376 MHz,  $\text{CDCl}_3$ )  $\delta$ : -114.4; HRMS (ESI)  $m/z$  calcd for  $\text{C}_{15}\text{H}_{17}\text{F}_1\text{Na}_1\text{O}_1^+$   $[\text{M}+\text{Na}]^+$  255.1161, found 255.1154; IR (ATR)  $\nu$ : 3353, 2962, 1939, 1601, 1508, 1228, 962, 803  $\text{cm}^{-1}$ ; m.p. 53  $^{\circ}\text{C}$ ; pale red solid (quant)

**2-ethyl-6-methylhepta-2,3,5-trien-1-ol (S6i)**

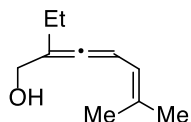

$^1\text{H NMR}$  (400 MHz,  $\text{CDCl}_3$ )  $\delta$ : 1.04 (t,  $J = 7.6$  Hz, 3H), 1.45 (t,  $J = 6.0$  Hz, 1H), 1.75 (s, 3H), 1.78 (s, 3H), 2.00-2.06 (m, 2H), 4.01-4.11 (m, 2H), 5.61-5.65 (m, 1H), 6.21-6.27 (m, 1H);  $^{13}\text{C NMR}$

NMR (100 MHz, CDCl<sub>3</sub>)  $\delta$ : 18.0, 22.6, 25.6, 25.9, 63.0, 95.0, 108.2, 120.0, 134.5, 201.6; HRMS (ESI)  $m/z$  calcd for C<sub>10</sub>H<sub>17</sub>O<sub>1</sub><sup>+</sup> [M+H]<sup>+</sup> 153.1279, found 153.1247; IR (ATR)  $\nu$ : 3341, 2965, 1943, 1376, 1010, 821 cm<sup>-1</sup>; colorless oil (84%)

### Synthesis of 1

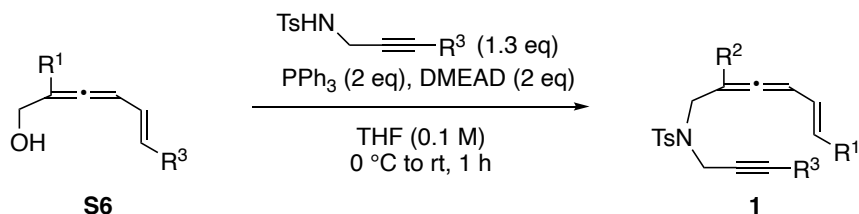

### General procedure of the Mitsunobu reaction

To a solution of **S6** (1.40 mmol), PPh<sub>3</sub> (477.3 mg, 1.820 mmol), **S7** (1.540 mmol) in THF (7.0 mL) was added bis(2-methoxyethyl) azodicarboxylate (426.2 mg, 1.820 mmol) at 0 °C. The reaction mixture was warmed up to room temperature and stirred for 1 h. When the reaction was completed, it was quenched by H<sub>2</sub>O and the aqueous layer was extracted with AcOEt then dried over anhydrous Na<sub>2</sub>SO<sub>4</sub>. The organic phase was concentrated under reduced pressure and the residue was purified by column chromatography on silica gel (*n*-Hexane/AcOEt = 50/1-20/1) to afford **1**.

### (*E*)-*N*-(4,4-dimethylpent-2-yn-1-yl)-*N*-(2-ethyl-6-phenylhexa-2,3,5-trien-1-yl)-4-methylbenzenesulfonamide (**1a**)

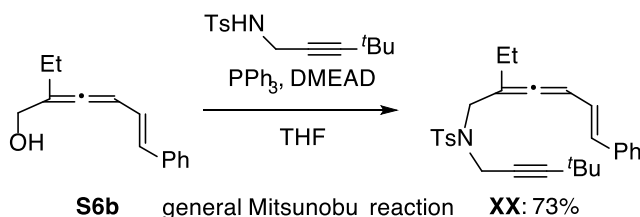

<sup>1</sup>H NMR (400 MHz, CDCl<sub>3</sub>)  $\delta$ : 0.89 (s, 9H), 1.06 (t, 3H,  $J$  = 7.2 Hz), 2.01-2.08 (m, 2H), 2.40 (s, 3H), 3.82 (dq, 1H,  $J$  = 1.6, 13.2 Hz), 3.88 (dq, 1H, 1.6, 13.2 Hz), 4.12 (d, 2H,  $J$  = 1.6 Hz), 6.05 (dt, 1H,  $J$  = 1.6, 9.6 Hz) 6.46 (d, 1H,  $J$  = 15.6 Hz), 6.53 (dd, 1H,  $J$  = 9.6, 15.6 Hz), 7.20 (t, 1H,  $J$  = 6.8 Hz), 7.28 (d, 2H,  $J$  = 8.0 Hz), 7.30 (d, 2H,  $J$  = 6.8 Hz), 7.36 (d, 2H,  $J$  = 6.8 Hz), 7.73 (d, 2H,  $J$  = 8.0 Hz); <sup>13</sup>C NMR (100 MHz, CDCl<sub>3</sub>)  $\delta$ : 12.0, 21.4, 22.7, 27.0, 30.5, 36.1, 48.7, 70.2, 94.9, 96.5, 102.4, 125.0, 126.1, 127.3, 127.7, 128.5, 129.4, 130.4, 136.1, 137.1, 143.2, 206.9; HRMS (ESI)  $m/z$  calcd for C<sub>28</sub>H<sub>33</sub>N<sub>1</sub>Na<sub>1</sub>O<sub>2</sub>S<sub>1</sub><sup>+</sup> [M+Na]<sup>+</sup> 470.2130, found 470.2125; IR (ATR)  $\nu$ : 2967, 1944, 1495, 1349, 1162, 961, 750, 673 cm<sup>-1</sup>; yellow gum (73%)

### (*E*)-*N*-(4,4-dimethylpent-2-yn-1-yl)-4-methyl-*N*-(2-methyl-6-phenylhexa-2,3,5-trien-1-yl)benzenesulfonamide (**1b**)

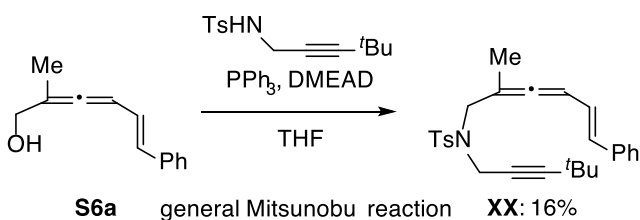

<sup>1</sup>H NMR (400 MHz, CDCl<sub>3</sub>)  $\delta$ : 0.90 (s, 9H), 1.80 (d,  $J$  = 2.8 Hz, 3H), 2.40 (s, 3H), 3.79 (dd,  $J$  = 2.0, 13.6 Hz, 1H),

3.85 (dd,  $J = 2.0, 13.6$  Hz, 1H), 4.08-4.18 (m, 2H), 5.92-5.98 (m, 1H), 6.46 (d,  $J = 16.0$  Hz, 1H), 6.53 (dd,  $J = 9.6, 16.0$  Hz, 1H), 7.20 (t,  $J = 8.0$  Hz, 1H), 7.29-7.31 (m, 4H), 7.35 (d,  $J = 7.2$  Hz, 2H), 7.73 (d,  $J = 8.0$  Hz, 2H);  $^{13}\text{C}$  NMR (100 MHz,  $\text{CDCl}_3$ )  $\delta$ : 16.1, 21.4, 27.0, 30.4, 36.0, 49.8, 70.2, 94.6, 94.8, 95.7, 124.8, 126.1, 127.3, 127.6, 128.5, 129.4, 130.6, 136.1, 137.0, 143.2, 207.4; HRMS (ESI)  $m/z$  calcd for  $\text{C}_{27}\text{H}_{31}\text{N}_1\text{Na}_1\text{O}_2\text{S}_1^+$   $[\text{M}+\text{Na}]^+$  456.1973, found 456.1977; IR (ATR)  $\nu$ : 2968, 2240, 1948, 1747, 1496, 1349, 1162, 962, 749  $\text{cm}^{-1}$ ; yellow gum (16%)

**(E)-N-(4,4-dimethylpent-2-yn-1-yl)-N-(2-isopropyl-6-phenylhexa-2,3,5-trien-1-yl)-4-methylbenzenesulfonamide (1c)**

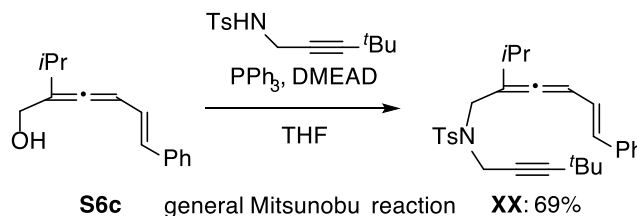

$^1\text{H}$  NMR (400 MHz,  $\text{CDCl}_3$ )  $\delta$ : 0.88 (s, 9H), 1.10 (d,  $J = 6.8$  Hz, 3H), 1.11 (d,  $J = 6.8$  Hz, 3H), 2.33-2.37 (m, 1H), 3.85 (dd,  $J = 2.4, 11.6$  Hz, 1H), 3.94 (dd,  $J = 11.6, 2.4$  Hz, 1H), 4.07-4.17 (m, 2H), 6.03-6.07 (m, 1H), 6.44-6.54 (m, 2H), 7.20 (t,  $J = 6.0$  Hz, 1H), 7.26-7.36 (m, 6H), 7.73 (d,  $J = 8.4$  Hz, 2H);  $^{13}\text{C}$  NMR (100 MHz,  $\text{CDCl}_3$ )  $\delta$ : 21.3, 21.5, 21.7, 26.9, 28.0, 30.4, 36.0, 47.4, 70.1, 94.9, 97.0, 107.0, 125.0, 126.1, 127.2, 127.6, 128.4, 129.4, 130.4, 136.0, 137.1, 143.1, 206.3; HRMS (ESI)  $m/z$  calcd for  $\text{C}_{29}\text{H}_{35}\text{N}_1\text{Na}_1\text{O}_2\text{S}_1^+$   $[\text{M}+\text{Na}]^+$  484.2286, found 484.2278; IR (ATR)  $\nu$ : 2964, 1946, 1456, 1350, 1264, 1163, 1092, 960, 814  $\text{cm}^{-1}$ ; m.p. 103-104  $^\circ\text{C}$ ; colorless solid (69%)

**(E)-N-(2-isopropyl-6-phenylhexa-2,3,5-trien-1-yl)-4-methyl-N-(3-(trimethylsilyl)prop-2-yn-1-yl)benzenesulfonamide (1d)**

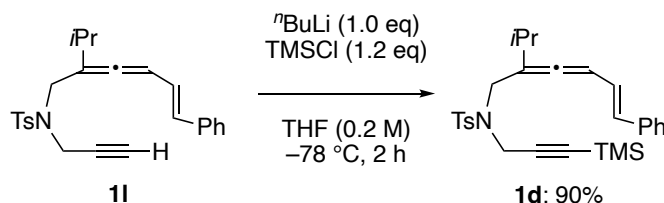

**11** to **1d**:  $n\text{-BuLi}$  (0.25 mL, 1.55 M in hexanes, 0.380 mmol) was added to a solution of **xx** (154.0 mg, 0.380 mmol) in THF (1.9 mL) dropwise at  $-78$   $^\circ\text{C}$  under argon. After being stirred for 10 minutes at same temperature, trimethylsilyl chloride (0.06 mL, 0.456 mmol) was added, and stirred for 3 h at  $-78$   $^\circ\text{C}$ . When the reaction was complete, it was quenched with saturated aqueous solution of  $\text{NH}_4\text{Cl}$ , extracted with  $\text{Et}_2\text{O}$  and dried over anhydrous  $\text{Na}_2\text{SO}_4$ . The organic phase was concentrated under reduced pressure and the residue was purified by column chromatography on silica gel ( $n\text{-Hexane}/\text{AcOEt} = 50/1$ ) to afford pure **1d** as colorless solid (90%, 163.0 mg).

$^1\text{H}$  NMR (400 MHz,  $\text{CDCl}_3$ )  $\delta$ : 0.09 (s, 9H), 1.10 (d,  $J = 6.8$  Hz, 3H), 1.11 (d,  $J = 6.8$  Hz, 3H), 2.33-2.38 (m, 1H), 2.40 (s, 3H), 3.86 (dd,  $J = 2.0, 13.6$  Hz, 1H), 3.94 (dd,  $J = 2.0, 13.6$  Hz, 1H), 4.15 (s, 2H), 6.04-6.07 (m, 1H), 6.44-6.54 (m, 2H), 7.18-7.22 (m, 1H), 7.27-7.31 (m, 4H), 7.36 (d,  $J = 8.4$  Hz, 2H), 7.73 (d,  $J = 8.4$  Hz, 2H);  $^{13}\text{C}$  NMR (100 MHz,  $\text{CDCl}_3$ )  $\delta$ : -0.5, 21.5, 21.5, 21.8, 28.1, 36.6, 47.7, 91.2, 97.2, 97.2, 107.0, 124.9, 126.2, 127.3, 127.7, 128.5, 129.4, 130.5, 135.8, 137.1, 143.3, 206.3; HRMS (ESI)  $m/z$  calcd for  $\text{C}_{28}\text{H}_{35}\text{N}_1\text{Na}_1\text{O}_2\text{S}_1\text{Si}_1^+$   $[\text{M}+\text{Na}]^+$  500.2056, found 500.2057; IR (ATR)  $\nu$ : 2960, 1942, 1449, 1349, 1250, 1161, 961, 814  $\text{cm}^{-1}$ ; m.p. 120-121  $^\circ\text{C}$ ; colorless solid (89%, 42.2 mg)

**(E)-N-(4,4-dimethylpent-2-yn-1-yl)-N-(2-ethyl-6-(4-fluorophenyl)hexa-2,3,5-trien-1-yl)-4-**

**methylbenzenesulfonamide (1e)**

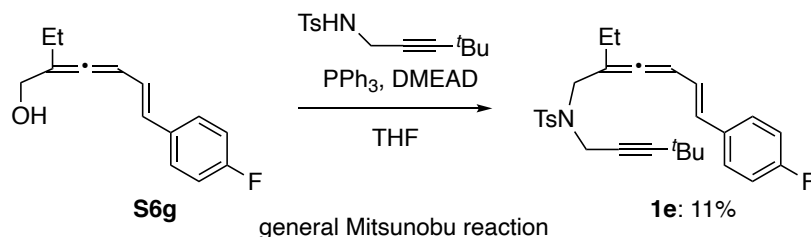

$^1\text{H}$  NMR (400 MHz,  $\text{CDCl}_3$ )  $\delta$ : 0.89 (s, 9H), 1.06 (t,  $J = 7.2$  Hz, 3H), 2.05-2.17 (m, 2H), 2.40 (s, 3H), 3.81 (dd,  $J = 2.0, 12.8$  Hz, 1H), 3.89 (dd,  $J = 2.0, 12.8$  Hz, 1H), 4.09 (d,  $J = 18.4$  Hz, 1H), 4.15 (d,  $J = 18.4$  Hz, 1H), 6.00-6.05 (m, 1H), 6.40-6.48 (m, 2H), 6.96-7.01 (m, 2H), 7.27-7.33 (m, 4H), 7.73 (d,  $J = 8.4$  Hz, 2H);  $^{13}\text{C}$  NMR (100 MHz,  $\text{CDCl}_3$ )  $\delta$ : 12.0, 21.4, 22.8, 27.0, 30.5, 36.1, 48.7, 70.2, 94.9, 96.4, 102.6, 115.4 (d,  $J = 21.0$  Hz), 124.8, 127.6 (d,  $J = 10.5$  Hz), 127.7, 129.2, 129.4, 133.4 (d,  $J = 2.9$  Hz), 136.2, 143.2, 162.1 (d,  $J = 245.3$  Hz), 206.8;  $^{19}\text{F}$  NMR (376 MHz,  $\text{CDCl}_3$ )  $\delta$ : -114.4; HRMS (ESI)  $m/z$  calcd for  $\text{C}_{28}\text{H}_{32}\text{F}_1\text{N}_1\text{Na}_1\text{O}_2\text{S}_1^+$   $[\text{M}+\text{Na}]^+$  488.2036, found 488.2050; IR (ATR)  $\nu$ : 2968, 1945, 1455, 1349, 1227, 1162, 1093, 963, 810  $\text{cm}^{-1}$ ; colorless oil (11%)

**(E)-N-(4,4-dimethylpent-2-yn-1-yl)-N-(6-(4-fluorophenyl)-2-isopropylhexa-2,3,5-trien-1-yl)-4-methylbenzenesulfonamide (1f)**

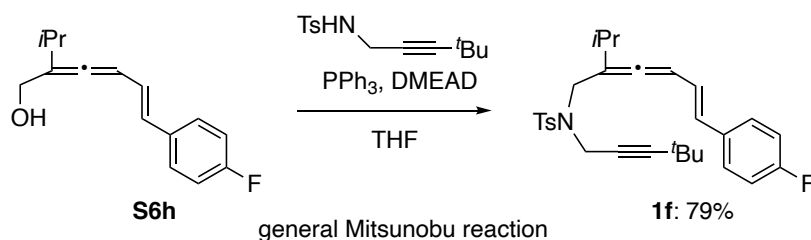

$^1\text{H}$  NMR (400 MHz,  $\text{CDCl}_3$ )  $\delta$ : 0.88 (s, 9H), 1.10 (d,  $J = 6.4$  Hz, 6H), 2.33-2.40 (m, 1H), 2.40 (s, 3H), 3.83 (d,  $J = 2.0, 13.6$  Hz, 1H), 3.94 (d,  $J = 13.6$  Hz, 1H), 4.08 (d,  $J = 18.4$  Hz, 1H), 4.15 (d,  $J = 18.4$  Hz, 1H), 6.01-6.05 (m, 1H), 6.37-6.46 (m, 2H), 6.97 (d,  $J = 8.4$  Hz, 1H), 6.99 (d,  $J = 8.4$  Hz, 1H), 7.27-7.32 (m, 4H), 7.73 (d,  $J = 7.6$  Hz, 2H);  $^{13}\text{C}$  NMR (100 MHz,  $\text{CDCl}_3$ )  $\delta$ : 21.4, 21.5, 21.8, 27.0, 28.1, 30.5, 36.1, 47.7, 70.2, 95.0, 96.9, 107.2, 115.4 (d,  $J = 20.9$  Hz), 124.9, 127.6 (d,  $J = 7.7$  Hz), 127.7, 129.1, 129.5, 133.4 (d,  $J = 2.9$  Hz), 136.1, 143.2, 160.1 (d,  $J = 145.9$  Hz), 206.4;  $^{19}\text{F}$  NMR (376 MHz,  $\text{CDCl}_3$ )  $\delta$ : -114.4; HRMS (ESI)  $m/z$  calcd for  $\text{C}_{29}\text{H}_{34}\text{F}_1\text{N}_1\text{Na}_1\text{O}_2\text{S}_1^+$   $[\text{M}+\text{Na}]^+$  502.2192, found 502.2200; IR (ATR)  $\nu$ : 2966, 1942, 1508, 1350, 1228, 1162, 834  $\text{cm}^{-1}$ ; m.p. 127  $^\circ\text{C}$ ; colorless solid (79%)

**(E)-N-(4,4-dimethylpent-2-yn-1-yl)-N-(6-(4-methoxyphenyl)-2-methylhexa-2,3,5-trien-1-yl)-4-methylbenzenesulfonamide (1g)**

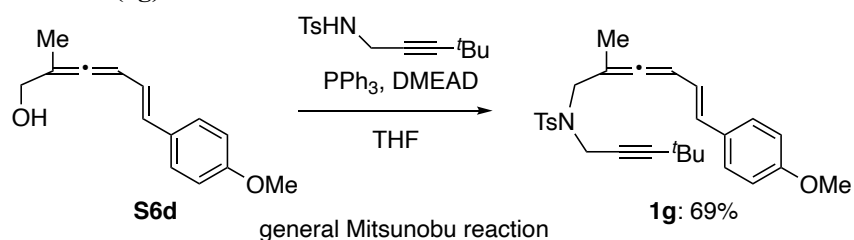

$^1\text{H}$  NMR (400 MHz,  $\text{CDCl}_3$ )  $\delta$ : 0.89 (s, 9H), 1.80 (d,  $J = 2.8$  Hz, 3H), 2.41 (s, 3H), 3.77-3.87 (m, 2H), 3.81 (s, 3H), 4.13 (d,  $J = 2.0$  Hz, 2H), 5.91-5.95 (m, 1H), 6.35-6.44 (m, 2H), 6.84 (d,  $J = 8.8$  Hz, 2H), 7.29 (d,  $J = 8.8$  Hz, 1H),

7.30 (d,  $J = 8.8$  Hz, 2H), 7.74 (d,  $J = 8.8$  Hz, 2H);  $^{13}\text{C}$  NMR (100 MHz,  $\text{CDCl}_3$ )  $\delta$ : 16.2, 21.4, 27.0, 30.5, 36.0, 49.9, 55.2, 70.2, 94.8, 95.6, 113.9, 122.6, 127.3, 127.6, 127.6, 129.4, 129.9, 130.1, 136.1, 143.2, 159.0, 207.1; HRMS (ESI)  $m/z$  calcd for  $\text{C}_{28}\text{H}_{33}\text{N}_1\text{Na}_1\text{O}_3\text{S}_1^+$   $[\text{M}+\text{Na}]^+$  486.2079, found 486.2081; IR (ATR)  $\nu$ : 2967, 1948, 1455, 1349, 1252, 1162, 1092, 963, 812  $\text{cm}^{-1}$ ; yellow gum (69%)

**(E)-N-(4,4-dimethylpent-2-yn-1-yl)-N-(2-isopropyl-6-(4-methoxyphenyl)hexa-2,3,5-trien-1-yl)-4-methylbenzenesulfonamide (1h)**

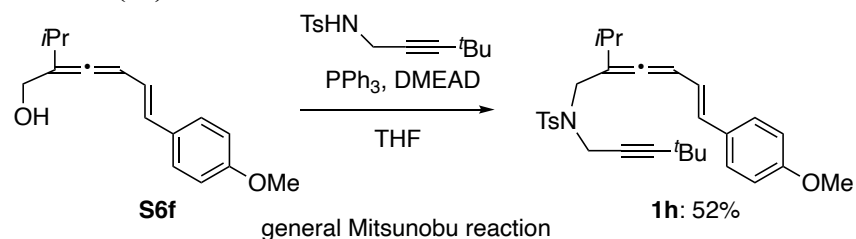

$^1\text{H}$  NMR (400 MHz,  $\text{CDCl}_3$ )  $\delta$ : 0.88 (s, 9H), 1.10 (d,  $J = 6.4$  Hz, 3H), 1.10 (d,  $J = 6.4$  Hz, 3H), 2.31-2.38 (m, 1H), 2.40 (s, 3H), 3.80 (s, 3H), 3.84 (dd,  $J = 2.0, 13.2$  Hz, 1H), 3.94 (dd,  $J = 2.0, 13.2$  Hz, 1H), 4.09 (d,  $J = 18.4$  Hz, 1H), 4.15 (d,  $J = 18.0$  Hz, 1H), 6.01-6.04 (m, 1H), 6.33-6.44 (m, 2H), 6.83 (d,  $J = 8.4$  Hz, 2H), 7.27-7.30 (m, 4H), 7.73 (d,  $J = 8.4$  Hz, 2H);  $^{13}\text{C}$  NMR (100 MHz,  $\text{CDCl}_3$ )  $\delta$ : 21.4, 21.5, 21.8, 27.0, 28.1, 30.5, 36.0, 47.5, 55.3, 70.2, 94.9, 97.2, 106.9, 113.9, 122.9, 127.3, 127.7, 129.4, 129.9, 130.0, 136.1, 143.2, 159.0, 206.1; HRMS (ESI)  $m/z$  calcd for  $\text{C}_{30}\text{H}_{37}\text{N}_1\text{Na}_1\text{O}_3\text{S}_1^+$   $[\text{M}+\text{Na}]^+$  514.2392, found 514.2385; IR (ATR)  $\nu$ : 2965, 1940, 1511, 1349, 1252, 1162, 813  $\text{cm}^{-1}$ ; m.p. 128  $^\circ\text{C}$ ; colorless solid (52%)

**(E)-5-(((4,4-dimethylpent-2-yn-1-yl)oxy)methyl)-6-methylhepta-1,3,4-trien-1-yl)benzene (1i)**

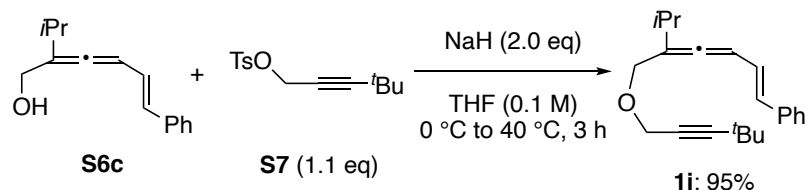

To a solution of **S6c** (107.2 mg, 0.500 mmol) in THF (1.5 mL) at 0  $^\circ\text{C}$  was added sodium hydride (2.0 eq) slowly. The mixture was stirred for 10 minutes at the same temperature, then a solution of **S7** (146.5 mg, 0.550 mmol) in THF (1.0 mL) was added slowly. The reaction mixture was warmed up to 40  $^\circ\text{C}$  and stirred for 3 h. When the reaction was completed, the reaction mixture was cooled down to 0  $^\circ\text{C}$ , and quenched by  $\text{H}_2\text{O}$  carefully. The aqueous layer was extracted with AcOEt then dried over anhydrous  $\text{Na}_2\text{SO}_4$ . The organic phase was concentrated under reduced pressure, and the residue was purified by column chromatography on silica gel ( $n$ -Hexane/AcOEt = 100/1-50/1) to afford pure **1i** as colorless oil (95%, 146.7 mg).

$^1\text{H}$  NMR (400 MHz,  $\text{CDCl}_3$ )  $\delta$ : 1.09 (dd,  $J = 6.4, 6.4$  Hz, 6 H), 1.23 (s, 9H), 2.34-2.41 (m, 1H), 4.15 (s, 4H), 6.03-6.14 (m, 1H), 6.49 (d,  $J = 15.6$  Hz, 1H), 6.59 (dd,  $J = 10.0, 15.6$  Hz, 1 H), 7.20 (t,  $J = 7.2$  Hz, 1H), 7.30 (dd,  $J = 7.2, 7.6$  Hz, 2H), 7.38 (d,  $J = 7.6$  Hz, 2H);  $^{13}\text{C}$  NMR (100 MHz,  $\text{CDCl}_3$ )  $\delta$ : 21.6, 21.8, 27.4, 28.3, 30.9, 57.3, 68.8, 74.1, 95.4, 96.6, 109.1, 125.5, 126.1, 127.2, 128.5, 130.1, 137.3, 205.9; HRMS (ESI)  $m/z$  calcd for  $\text{C}_{22}\text{H}_{28}\text{Na}_1\text{O}_1^+$   $[\text{M}+\text{Na}]^+$  331.2038, found 331.2036; IR (ATR)  $\nu$ : 2966, 1940, 1451, 1362, 1264, 1082, 960  $\text{cm}^{-1}$ ; colorless oil (95%, 146.7 mg)

**(E)-2-isopropyl-6-phenylhexa-2,3,5-trien-1-yl 4,4-dimethylpent-2-ynoate (2j)**



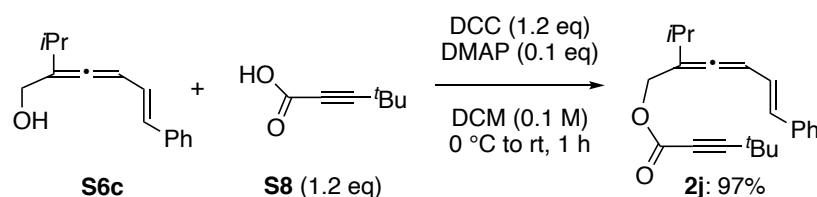

**S8** (70.6 mg, 0.560 mmol) was added to a solution of **S6c** (100.9 mg, 0.467 mmol), *N,N*-dicyclohexylcarbodiimide (115.6 mg, 0.560 mmol) and *N,N*-dimethyl-4-aminopyridine (5.6 mg, 0.047 eq) in DCM (4.67 mL) at 0 °C under argon. The reaction mixture was warmed up to room temperature and stirred for 1 h. When the reaction was completed, crude material was concentrated under reduced pressure and the residue was filtered. The crude material was purified by column chromatography on silica gel (*n*-Hexane/AcOEt = 50/1) to afford pure **2j** as colorless oil (97%, 146.6 mg).

$^1\text{H}$  NMR (400 MHz,  $\text{CDCl}_3$ )  $\delta$ : 1.09 (dd,  $J = 6.4, 6.4$  Hz, 6 H), 1.27 (s, 9H), 2.31-2.38 (m, 1H), 4.69-4.76 (m, 2H), 6.15-6.18 (m, 1H), 6.52 (d,  $J = 15.6$  Hz, 1H), 6.58 (dd,  $J = 9.2, 15.6$  Hz, 1 H), 7.21 (t,  $J = 7.2$  Hz, 1H), 7.31 (dd,  $J = 7.2, 8.0$  Hz, 2H), 7.39 (d,  $J = 8.0$  Hz, 2H);  $^{13}\text{C}$  NMR (100 MHz,  $\text{CDCl}_3$ )  $\delta$ : 21.5, 21.7, 27.5, 28.6, 29.9, 64.8, 71.5, 97.1, 97.9, 124.7, 128.3, 127.4, 128.5, 130.8, 137.2, 153.8, 205.9; HRMS (ESI)  $m/z$  calcd for  $\text{C}_{22}\text{H}_{26}\text{Na}_1\text{O}_2^+$  [ $\text{M}+\text{Na}$ ] $^+$  345.1831, found 345.1831; IR (ATR)  $\nu$ : 2967, 1943, 1709, 1383, 1362, 1210, 960, 746  $\text{cm}^{-1}$ ; colorless oil (97%, 146.6 mg)

**(*E*)-*N*-(but-2-yn-1-yl)-4-methyl-*N*-(2-methyl-6-phenylhexa-2,3,5-trien-1-yl)benzenesulfonamide (**1k**)**

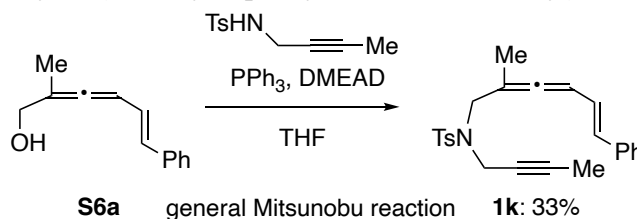

$^1\text{H}$  NMR (400 MHz,  $\text{CDCl}_3$ )  $\delta$ : 1.47 (t,  $J = 2.0$  Hz, 3H), 1.79 (d,  $J = 2.8$  Hz, 3H), 2.41 (s, 3H), 3.80 (d,  $J = 2.0$  Hz, 2H), 4.08 (q,  $J = 2.0$  Hz, 2H), 5.94 (dtq,  $J = 2.0, 2.8, 9.6$  Hz, 1H), 6.43-6.56 (m, 2H), 7.19-7.37 (m, 7H), 7.74 (d,  $J = 8.0$  Hz, 2H);  $^{13}\text{C}$  NMR (100 MHz,  $\text{CDCl}_3$ )  $\delta$ : 207.2, 143.2, 137.1, 136.0, 130.7, 129.2, 128.5, 127.8, 127.4, 126.1, 124.7, 96.0, 94.7, 81.7, 71.2, 50.0, 36.2, 21.4, 16.2, 3.1; yellow gum (33%, 55.4 mg)

**(*E*)-*N*-(2-isopropyl-6-phenylhexa-2,3,5-trien-1-yl)-4-methyl-*N*-(prop-2-yn-1-yl)benzenesulfonamide (**1l**)**

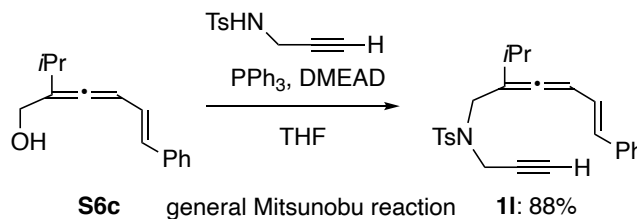

$^1\text{H}$  NMR (400 MHz,  $\text{CDCl}_3$ )  $\delta$ : 1.08 (d,  $J = 6.8$  Hz, 3H), 1.10 (d,  $J = 6.0$  Hz, 3H), 1.96 (t,  $J = 2.4$  Hz, 1H), 2.34 (qq,  $J = 6.0, 6.8$  Hz, 1H), 2.41 (s, 3H), 3.87 (dd,  $J = 2.0, 13.6$  Hz, 1H), 3.93 (dd,  $J = 2.0, 13.6$  Hz, 1H), 4.14 (d,  $J = 2.4$  Hz, 2H), 6.04-6.07 (m, 1H), 6.45-6.54 (m, 2H), 7.21 (t,  $J = 7.2$  Hz, 1H), 7.27-7.32 (m, 4H), 7.36 (d,  $J = 7.2$  Hz, 2H), 7.74 (d,  $J = 8.8$  Hz, 2H);  $^{13}\text{C}$  NMR (100 MHz,  $\text{CDCl}_3$ )  $\delta$ : 21.5, 21.8, 28.2, 35.7, 47.7, 73.9, 76.2, 97.4, 107.3, 124.8, 126.2, 127.4, 127.7, 128.6, 129.4, 130.7, 135.8, 137.1, 143.5, 206.2; HRMS (ESI)  $m/z$  calcd for  $\text{C}_{25}\text{H}_{27}\text{N}_1\text{Na}_1\text{O}_2\text{S}_1^+$  [ $\text{M}+\text{Na}$ ] $^+$  428.1660, found 428.1657; IR (ATR)  $\nu$ : 3295, 2961, 1941, 1495, 1349, 1161, 962, 749  $\text{cm}^{-1}$ ; colorless oil

(88%)

***N*-(4,4-dimethylpent-2-yn-1-yl)-*N*-(2-ethyl-6-methylhepta-2,3,5-trien-1-yl)-4-methylbenzenesulfonamide  
(1m)**

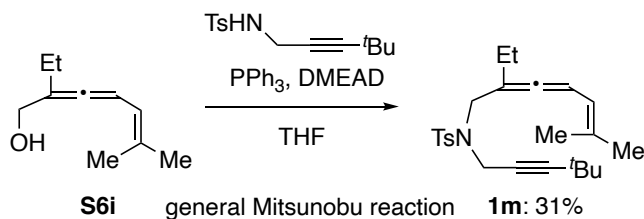

<sup>1</sup>H NMR (400 MHz, CDCl<sub>3</sub>) δ: 0.92 (s, 9H), 1.03 (t, *J* = 7.6 Hz, 3H), 1.67 (s, 3H), 1.74 (s, 3H), 2.00-2.10 (m, 2H), 2.40 (s, 3H), 3.76 (dd, *J* = 12.8, 1.6 Hz, 1H), 3.83 (dd, *J* = 12.8, 1.6 Hz, 1H), 4.08 (s, 2H), 5.37-5.57 (m, 1H), 6.00-6.05 (m, 1H), 7.28 (d, *J* = 8.0 Hz, 2H), 7.72 (d, *J* = 8.0 Hz, 2H); <sup>13</sup>C NMR (100 MHz, CDCl<sub>3</sub>) δ: 12.3, 18.0, 21.4, 22.7, 25.9, 27.0, 30.1, 35.9, 48.9, 70.3, 92.4, 94.6, 101.2, 119.8, 127.7, 129.4, 134.1, 136.2, 143.1, 205.6; HRMS (ESI) *m/z* calcd for C<sub>24</sub>H<sub>33</sub>N<sub>1</sub>Na<sub>1</sub>O<sub>2</sub>S<sub>1</sub><sup>+</sup> [M+Na]<sup>+</sup> 422.2130, found 422.2101; IR (ATR) ν: 2969, 1455, 1351, 1163, 835 cm<sup>-1</sup>; m.p. 73 °C; colorless solid (31%)

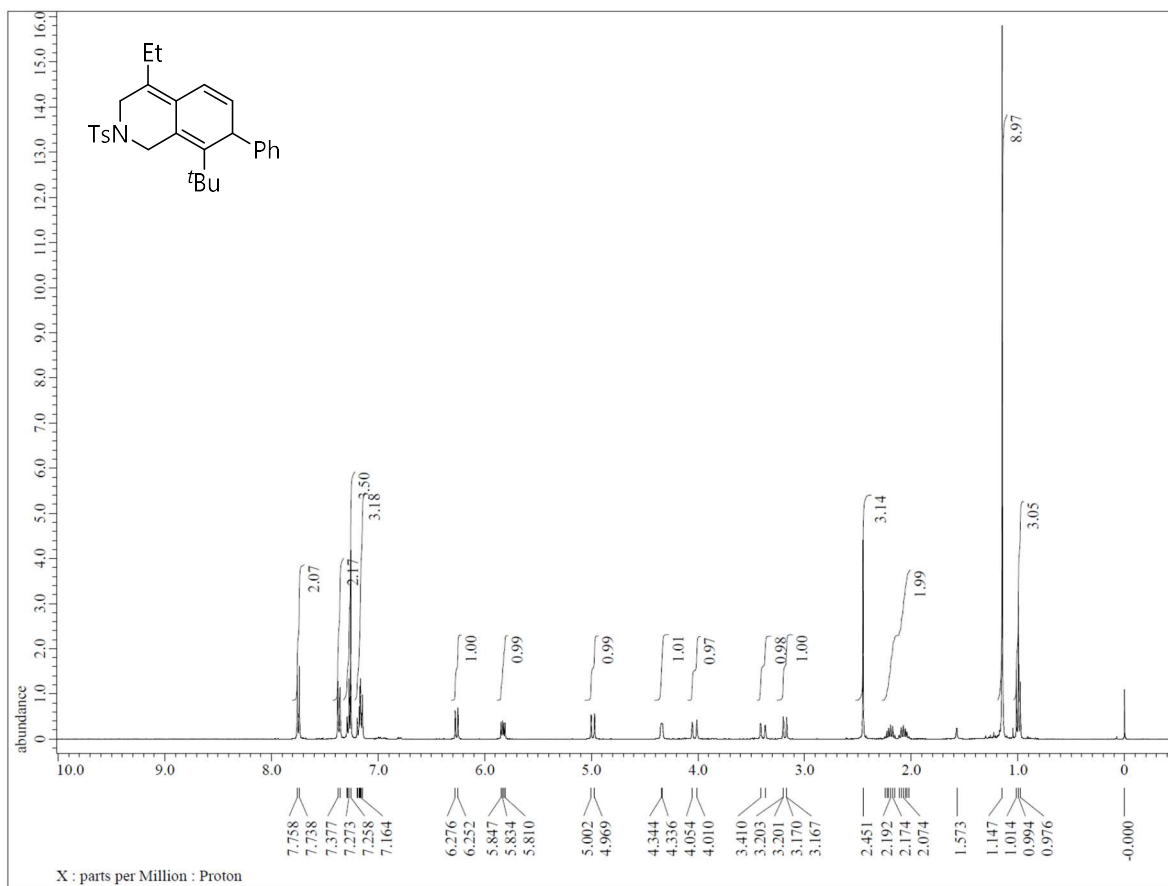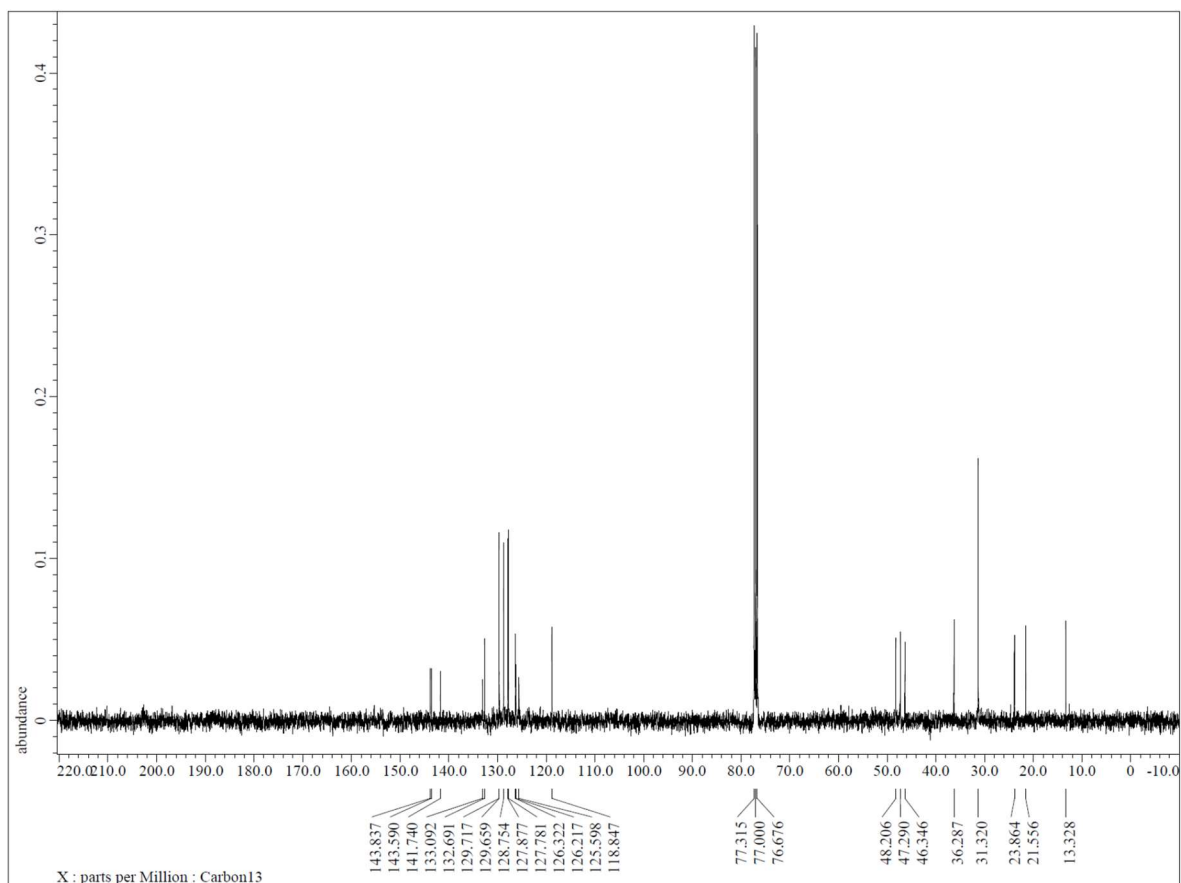

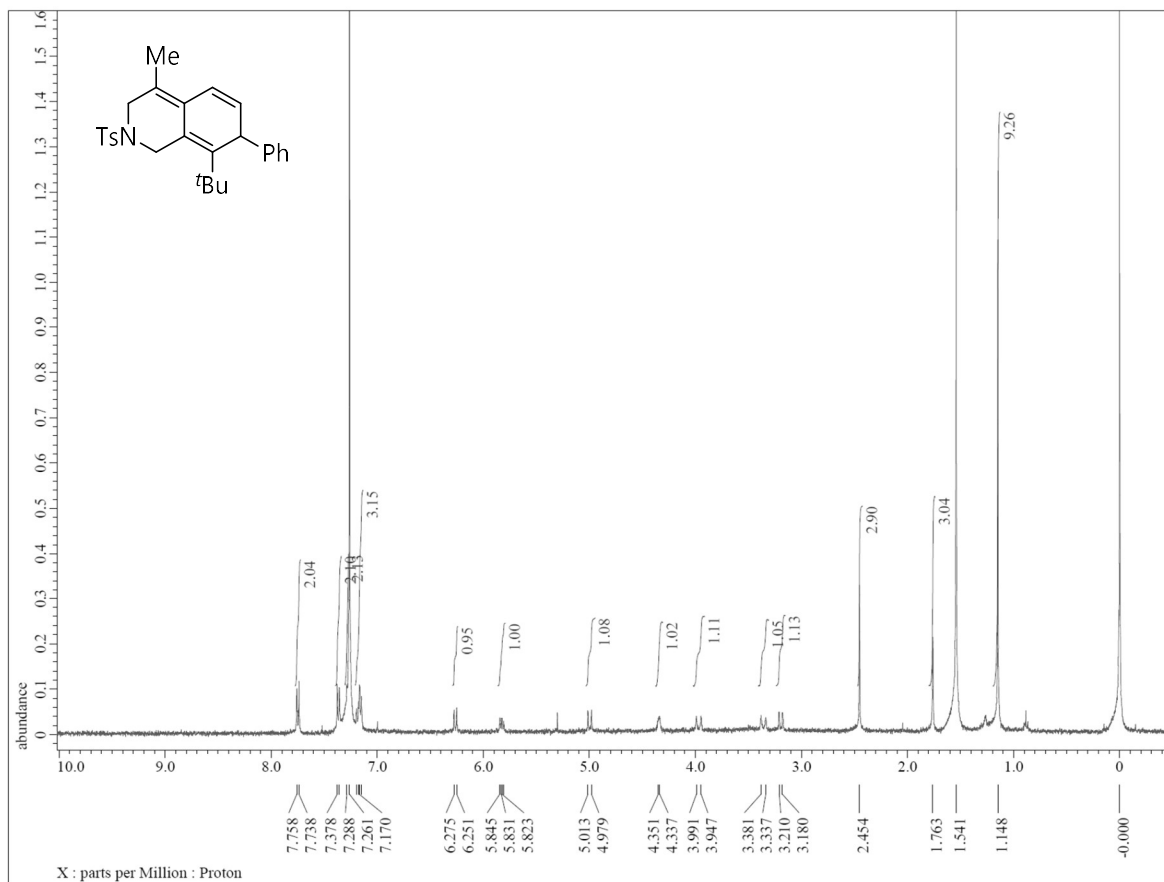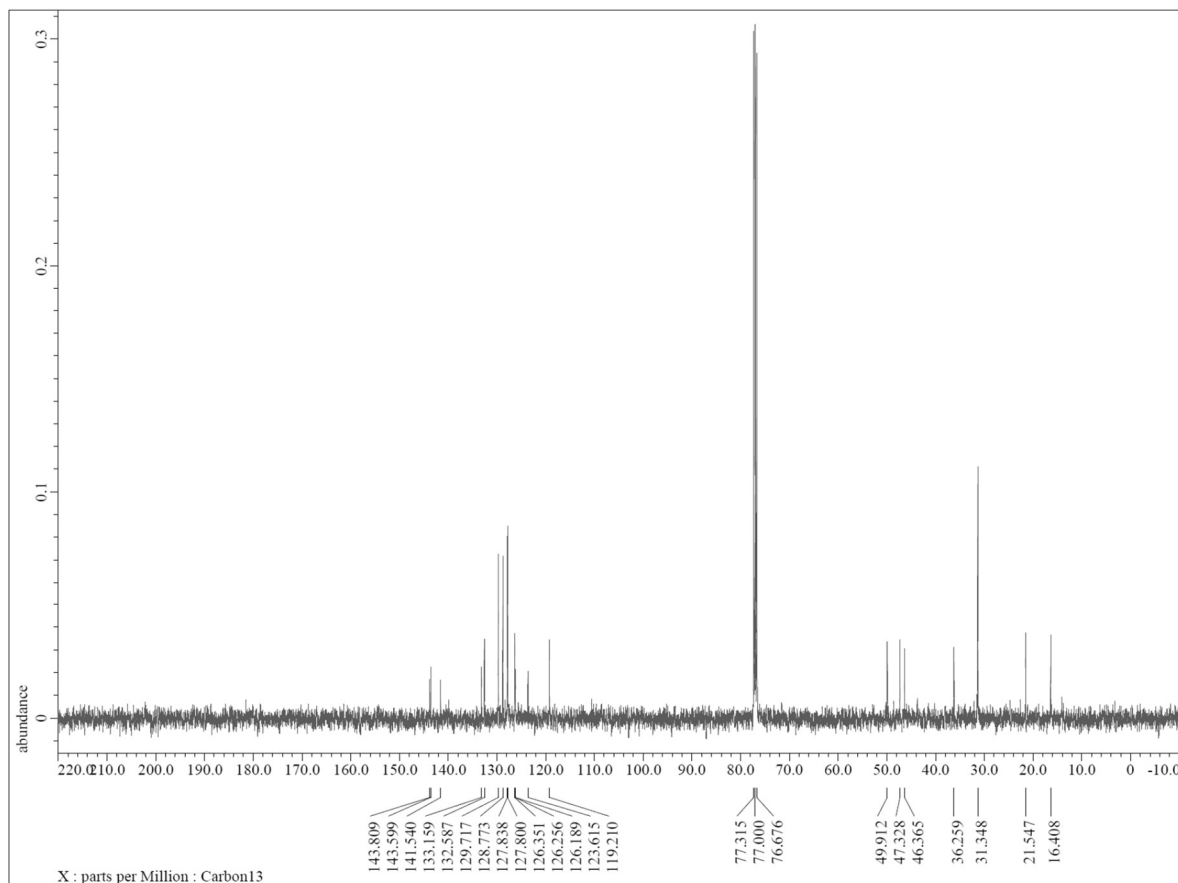

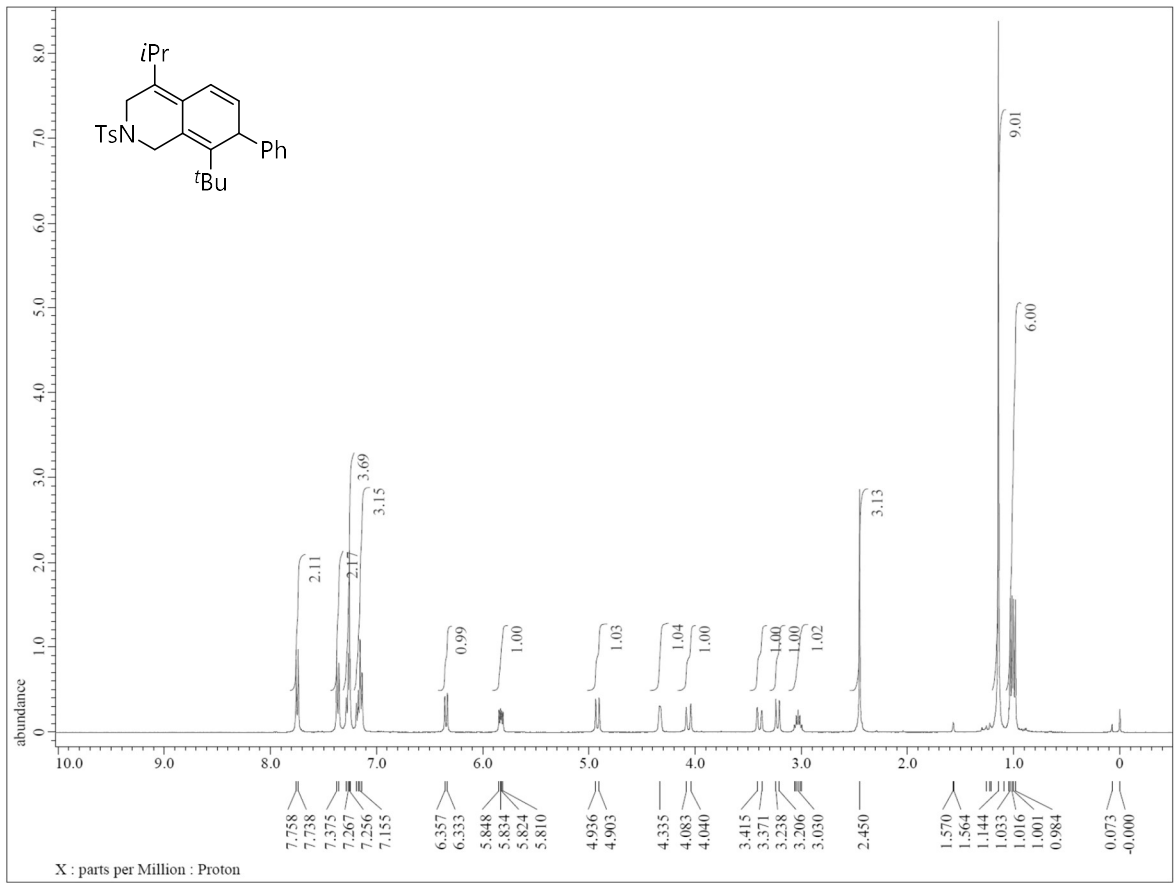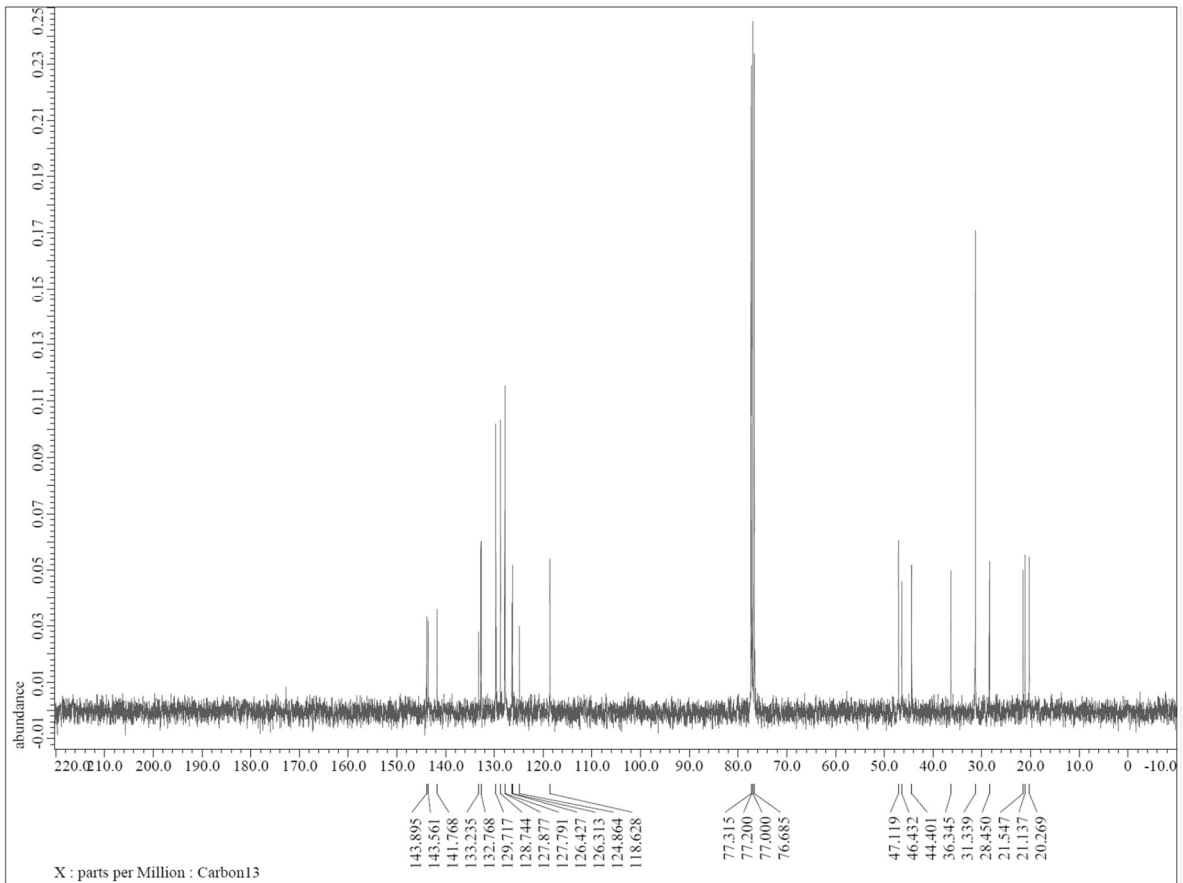



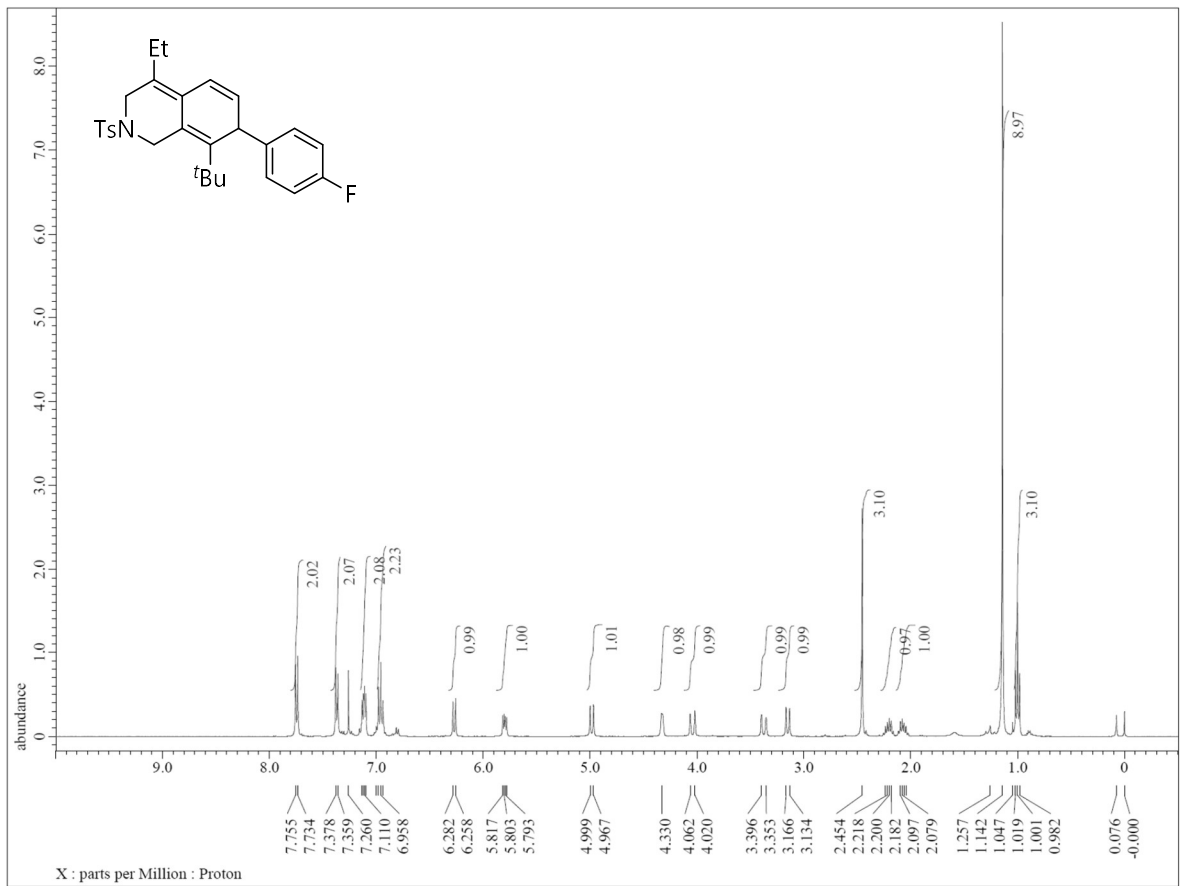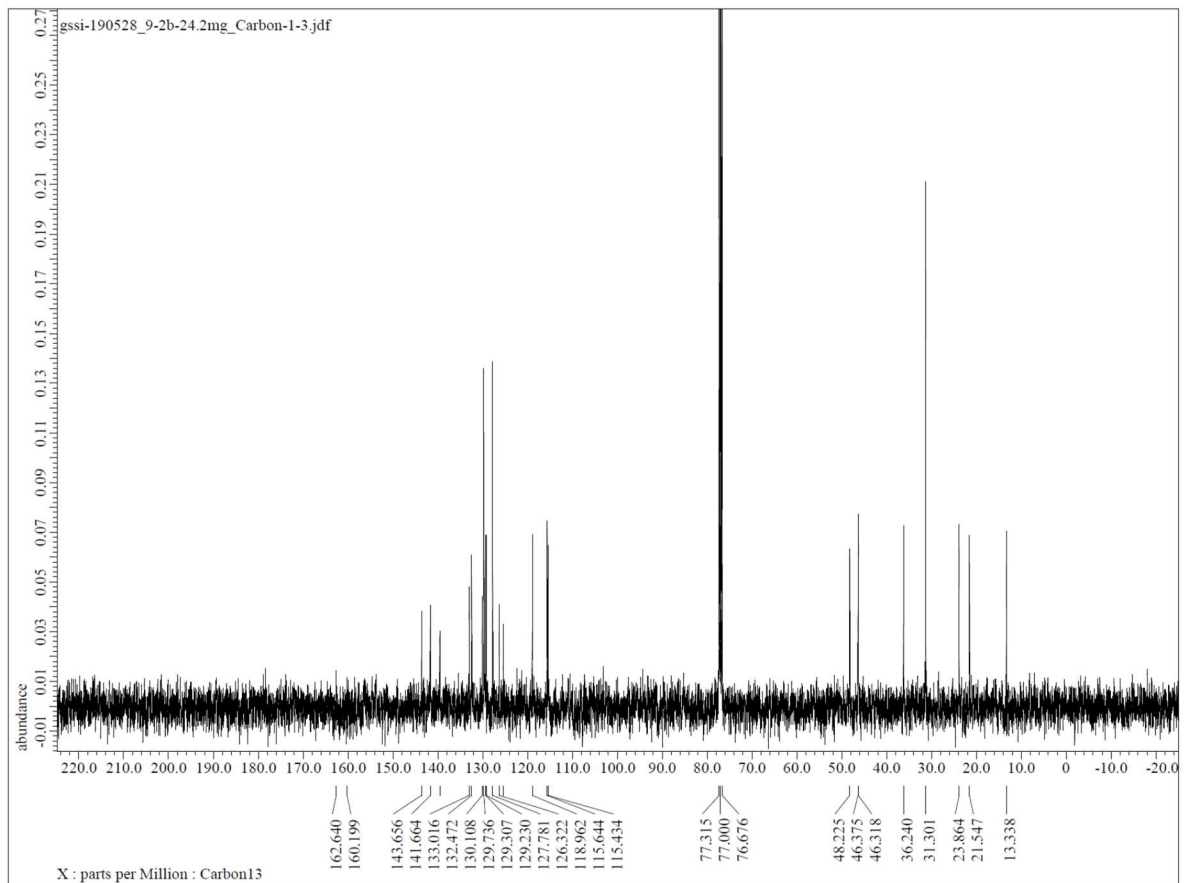

$^{19}\text{F}$  NMR (376 MHz,  $\text{CDCl}_3$ )

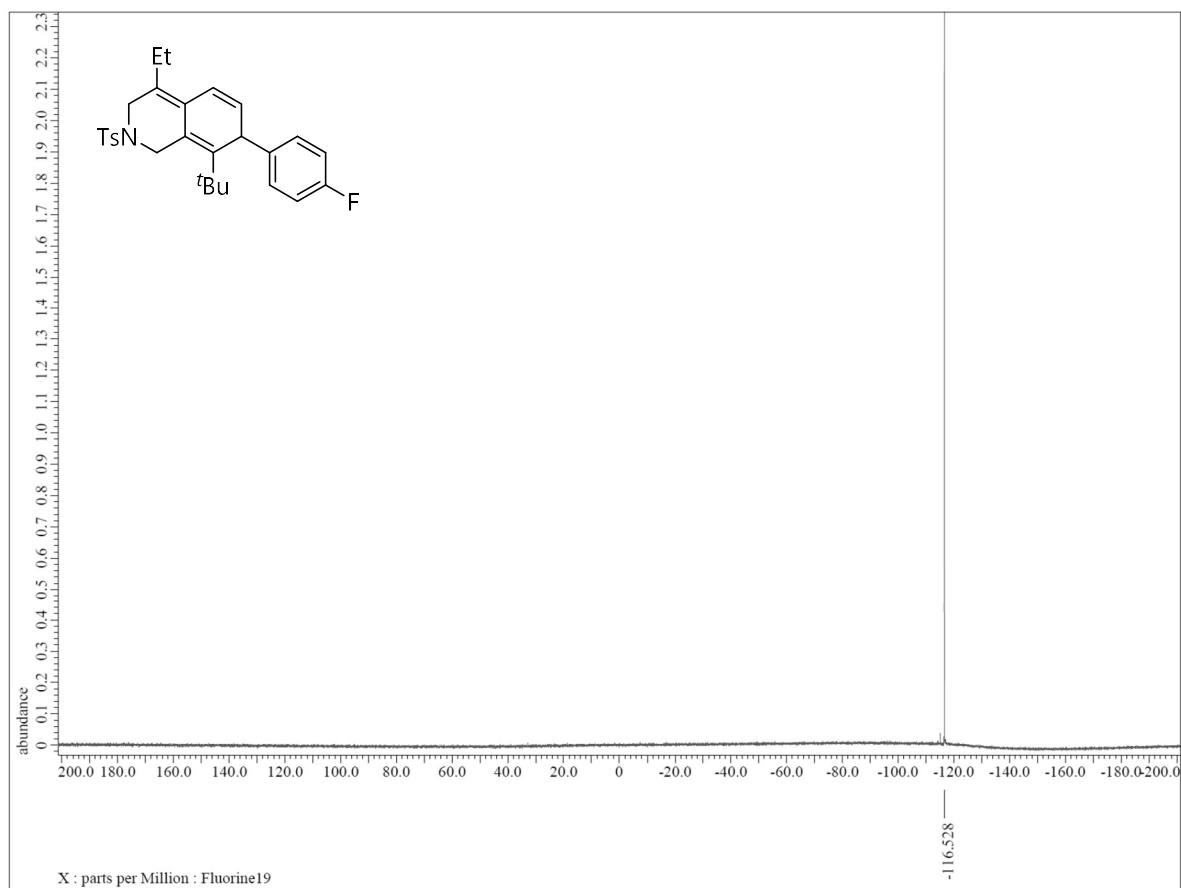



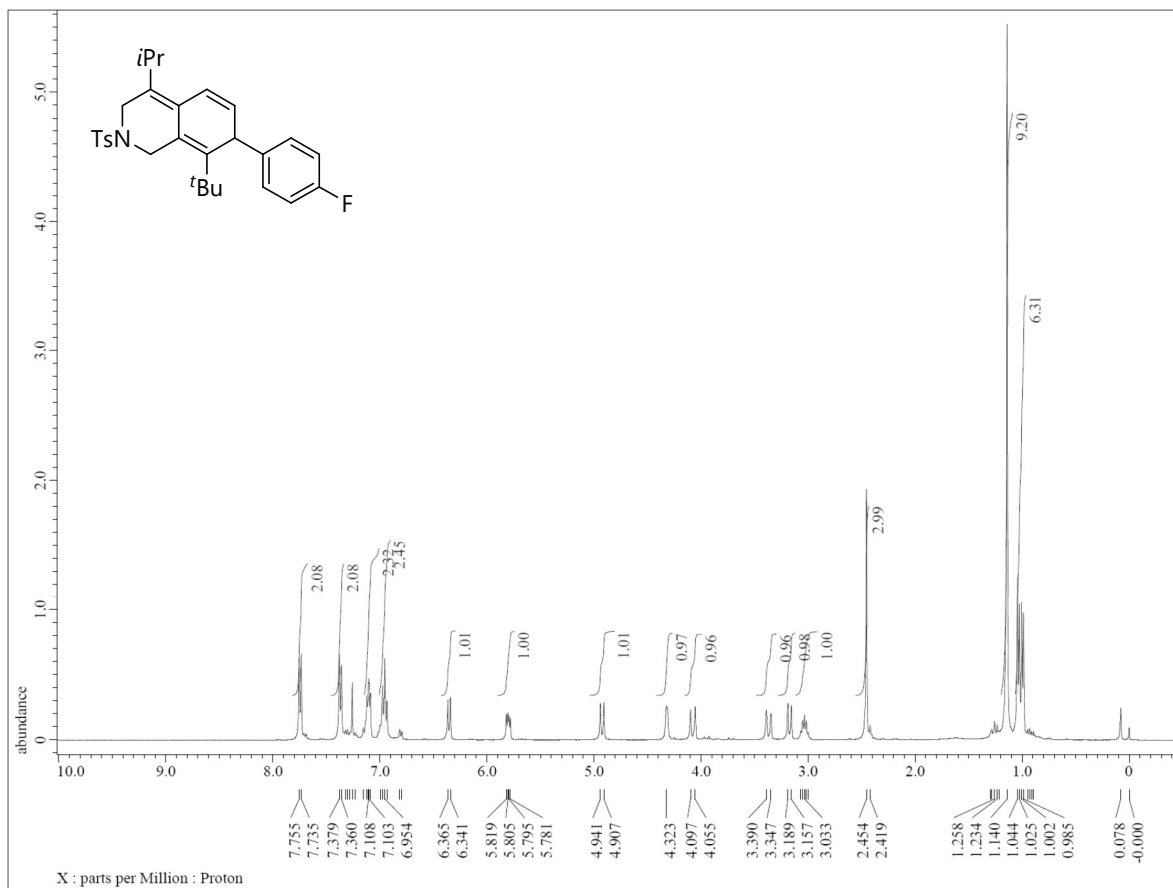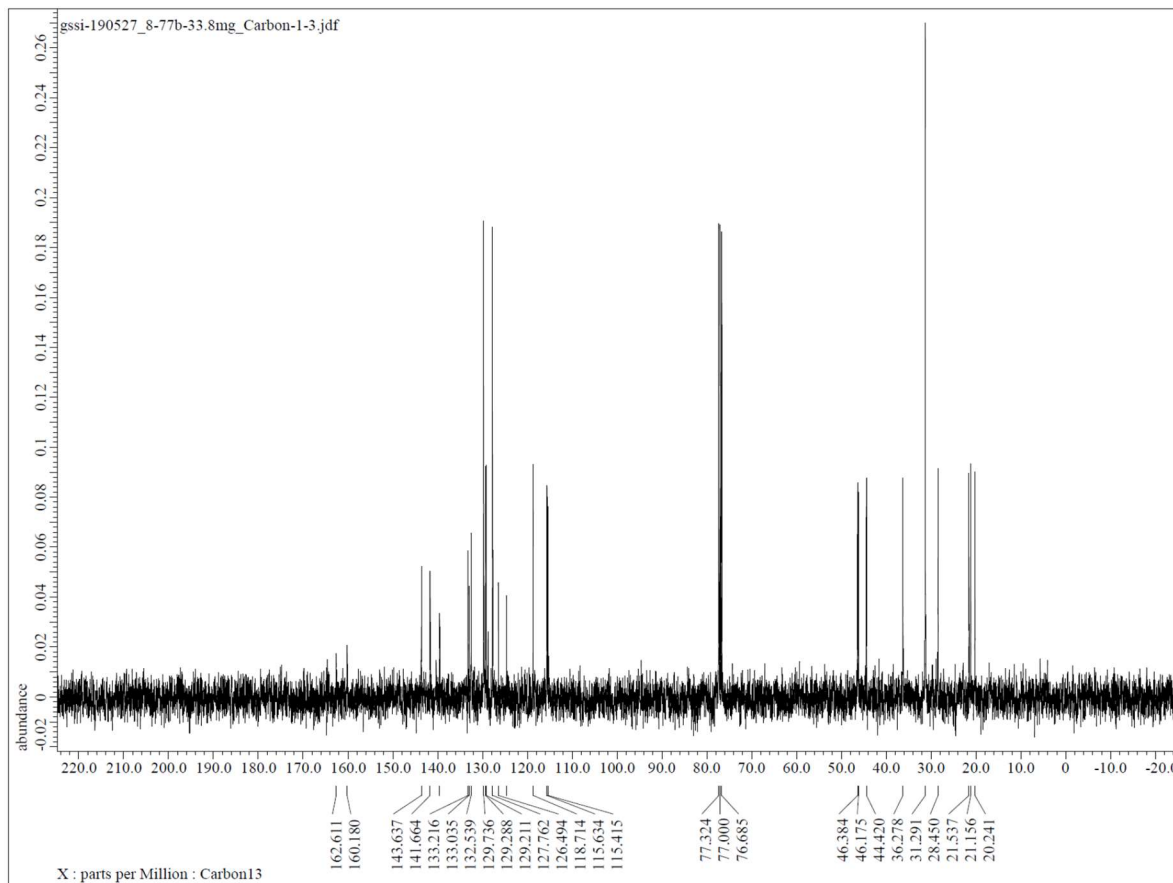

$^{19}\text{F}$  NMR (376 MHz,  $\text{CDCl}_3$ )

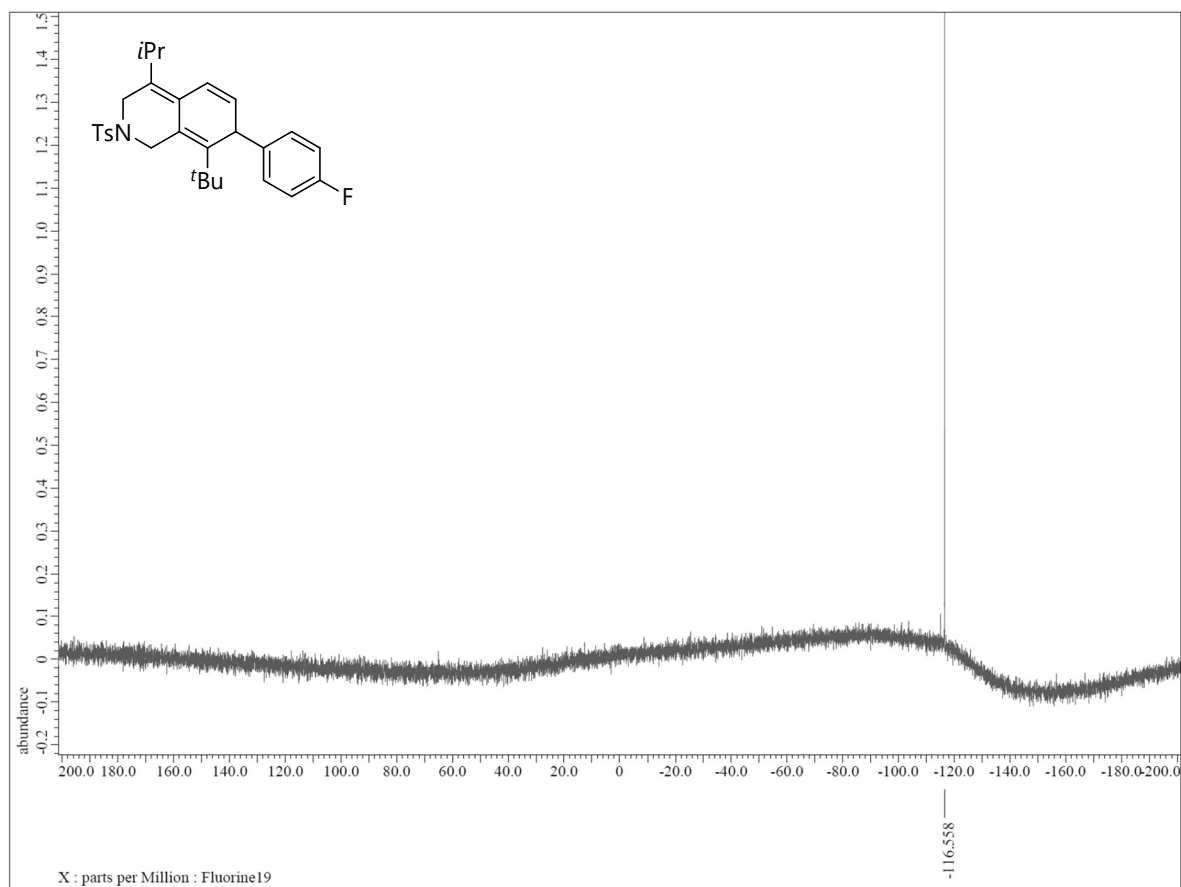

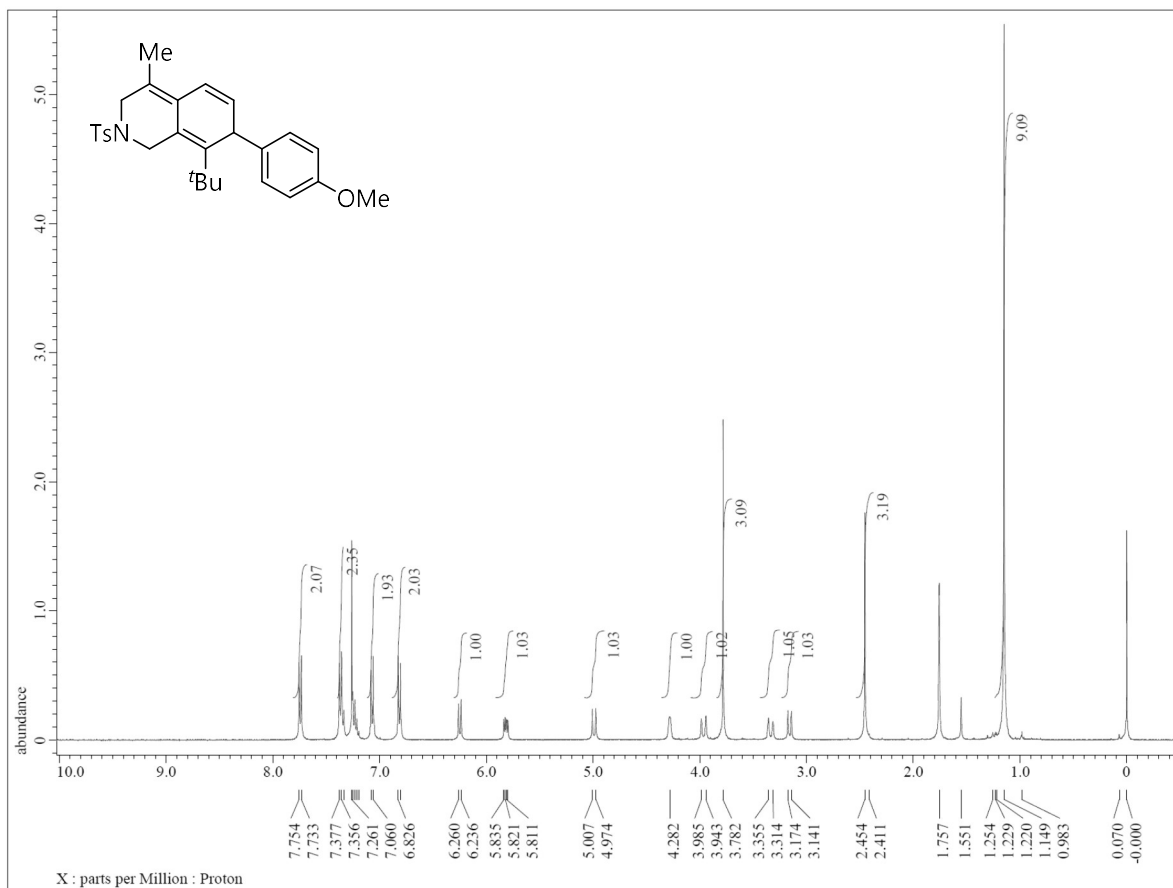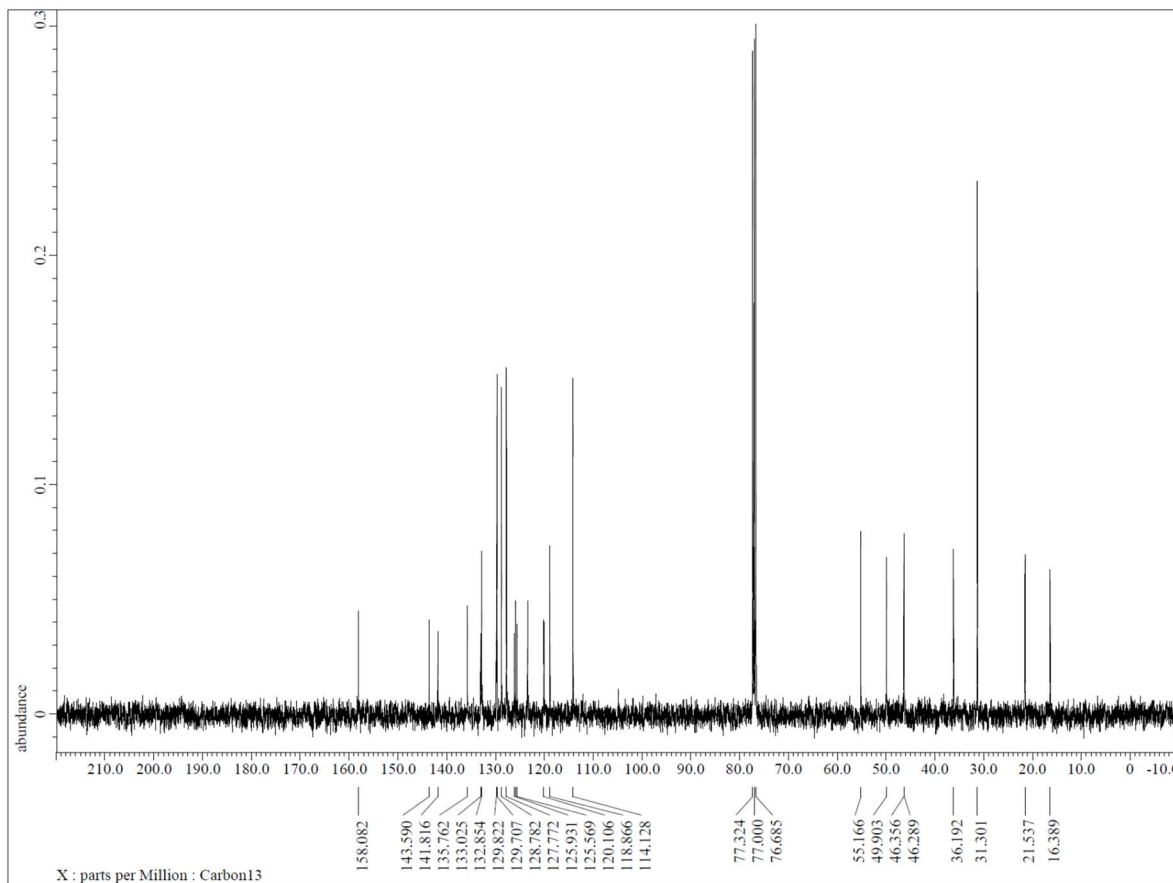

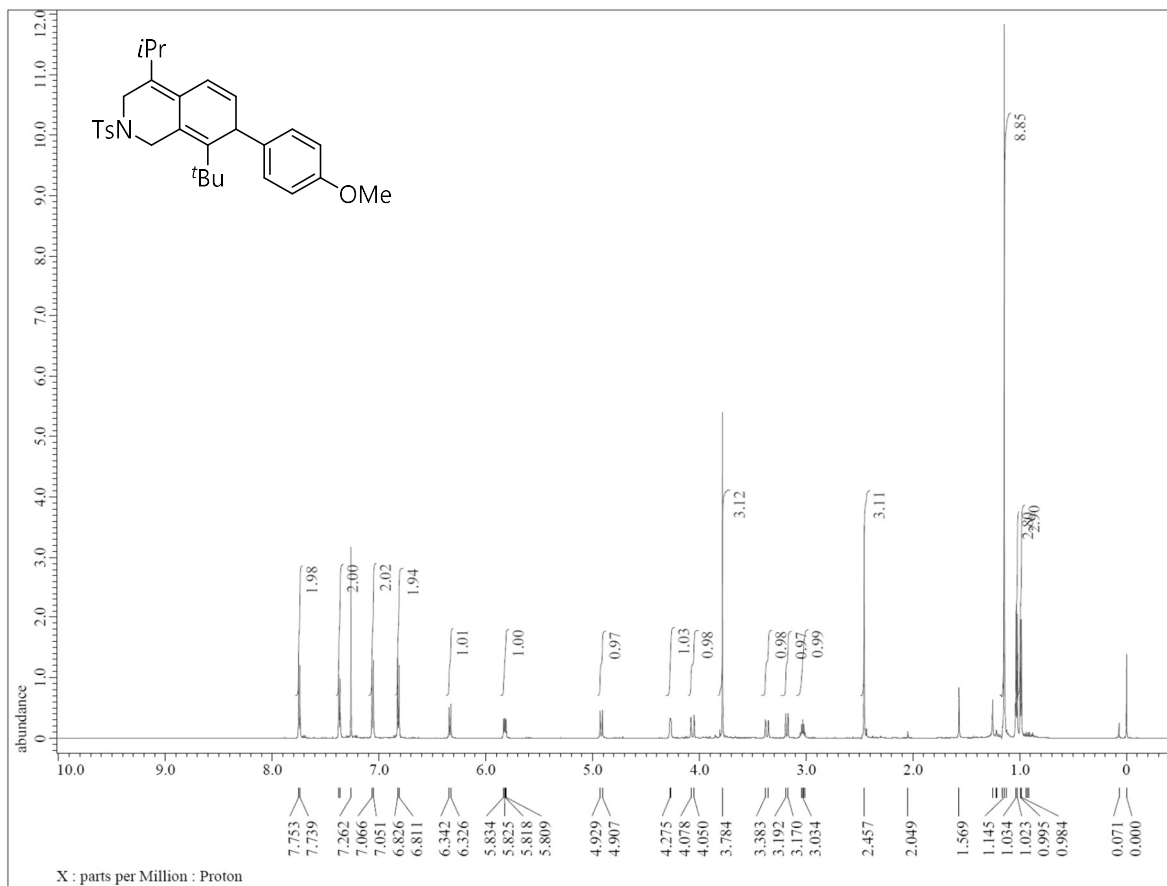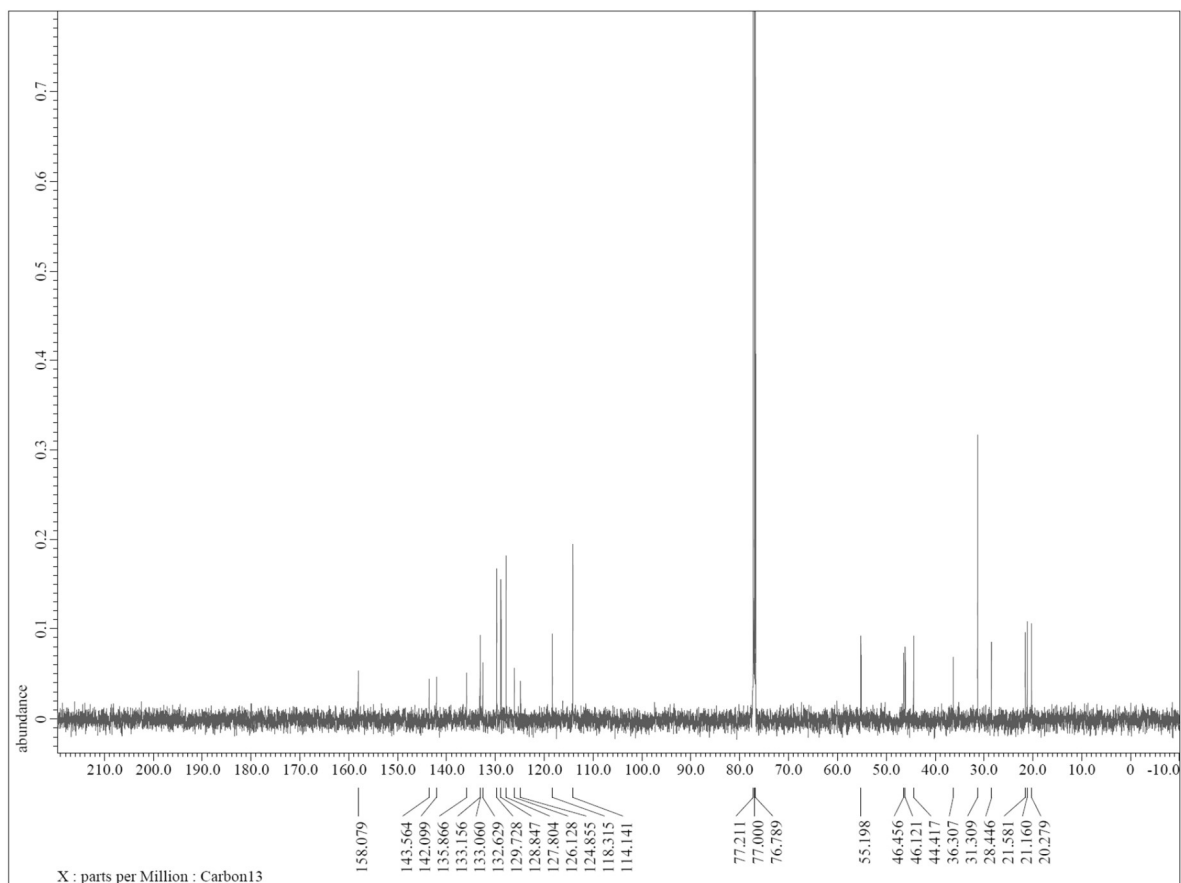

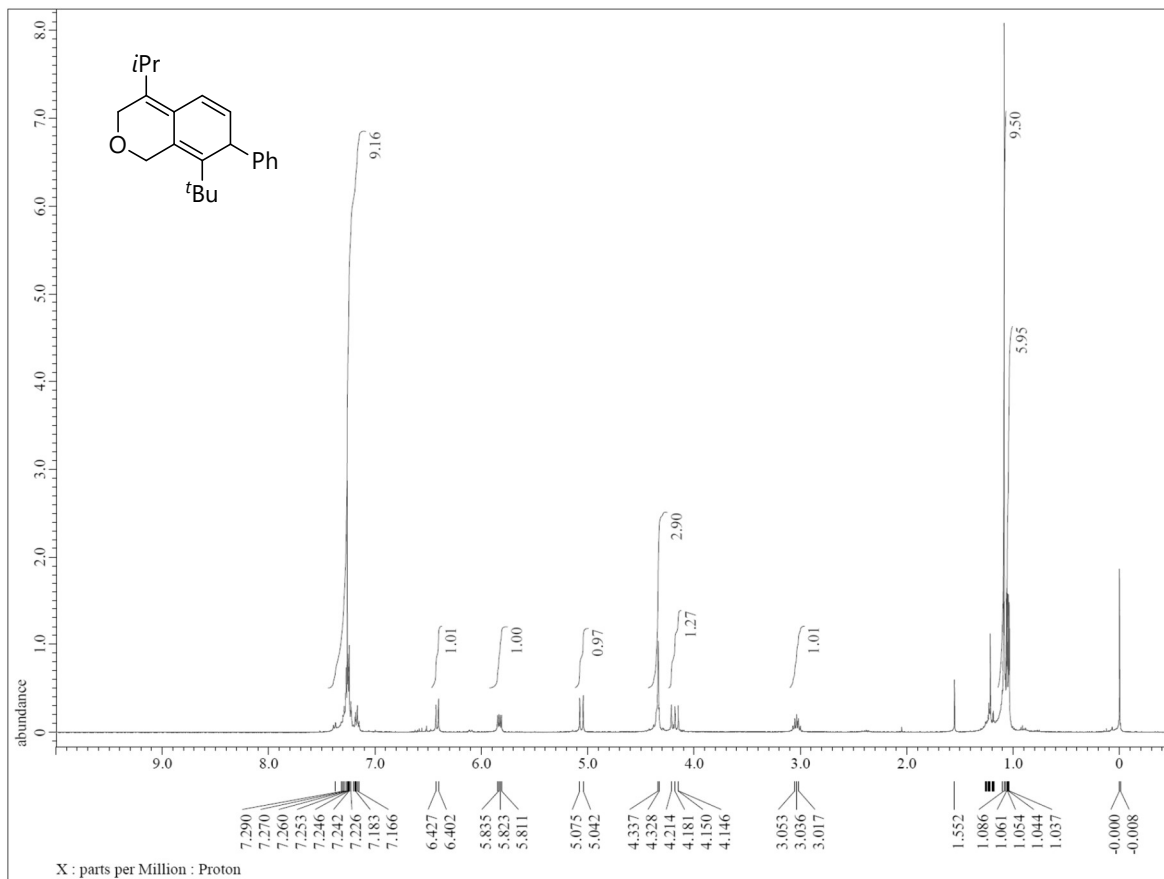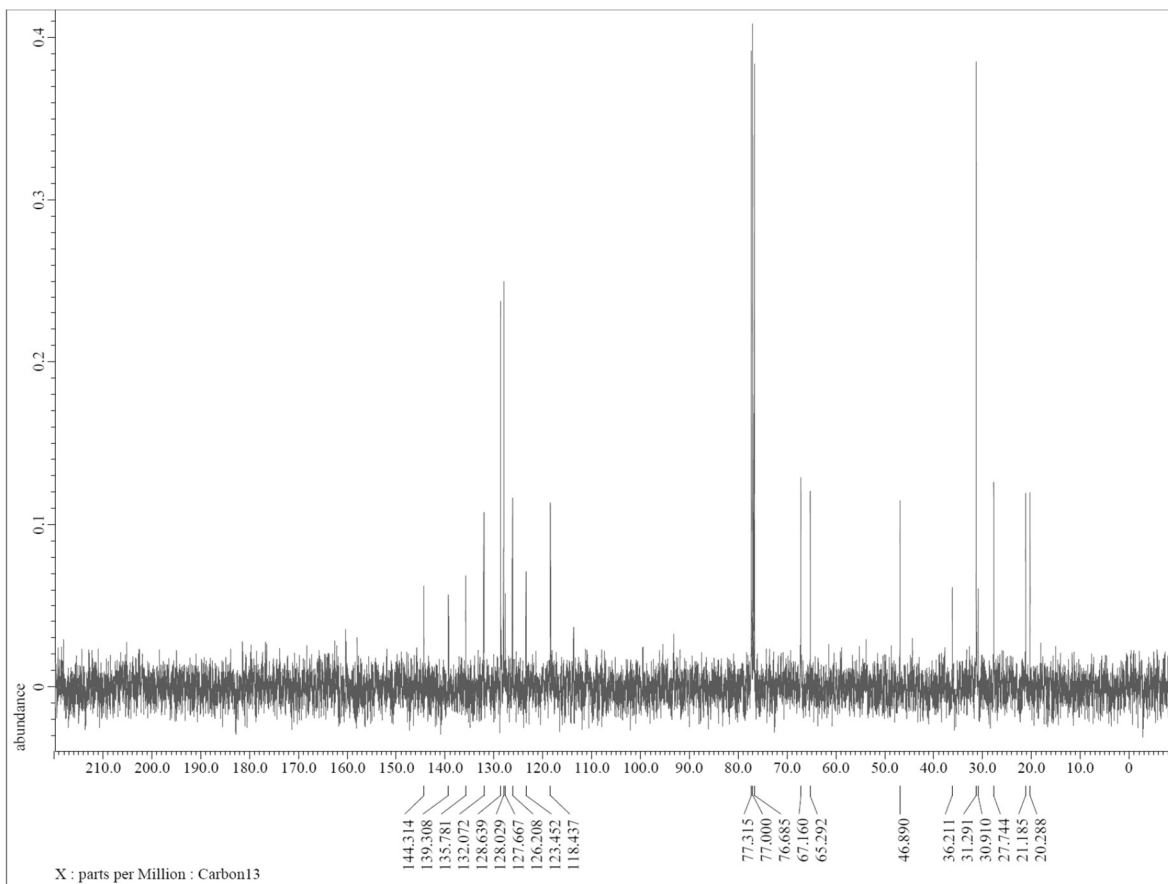

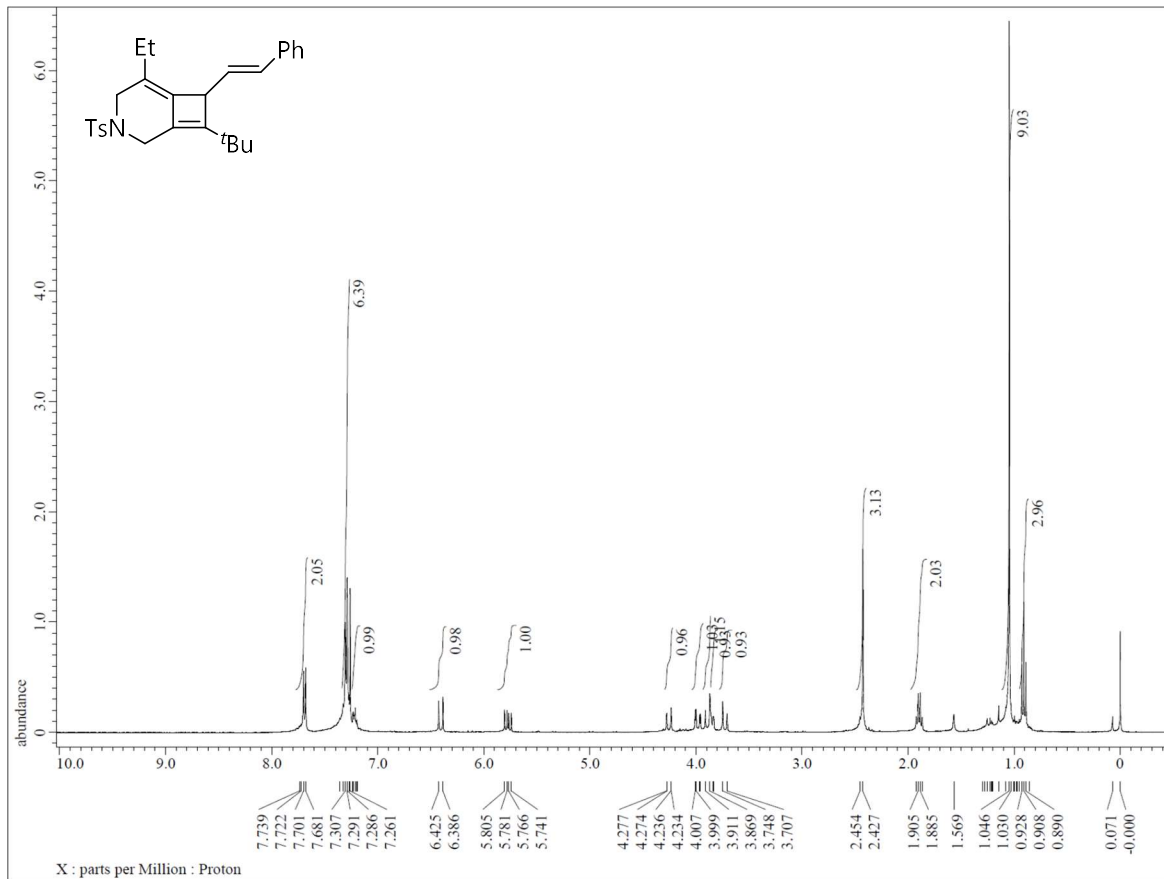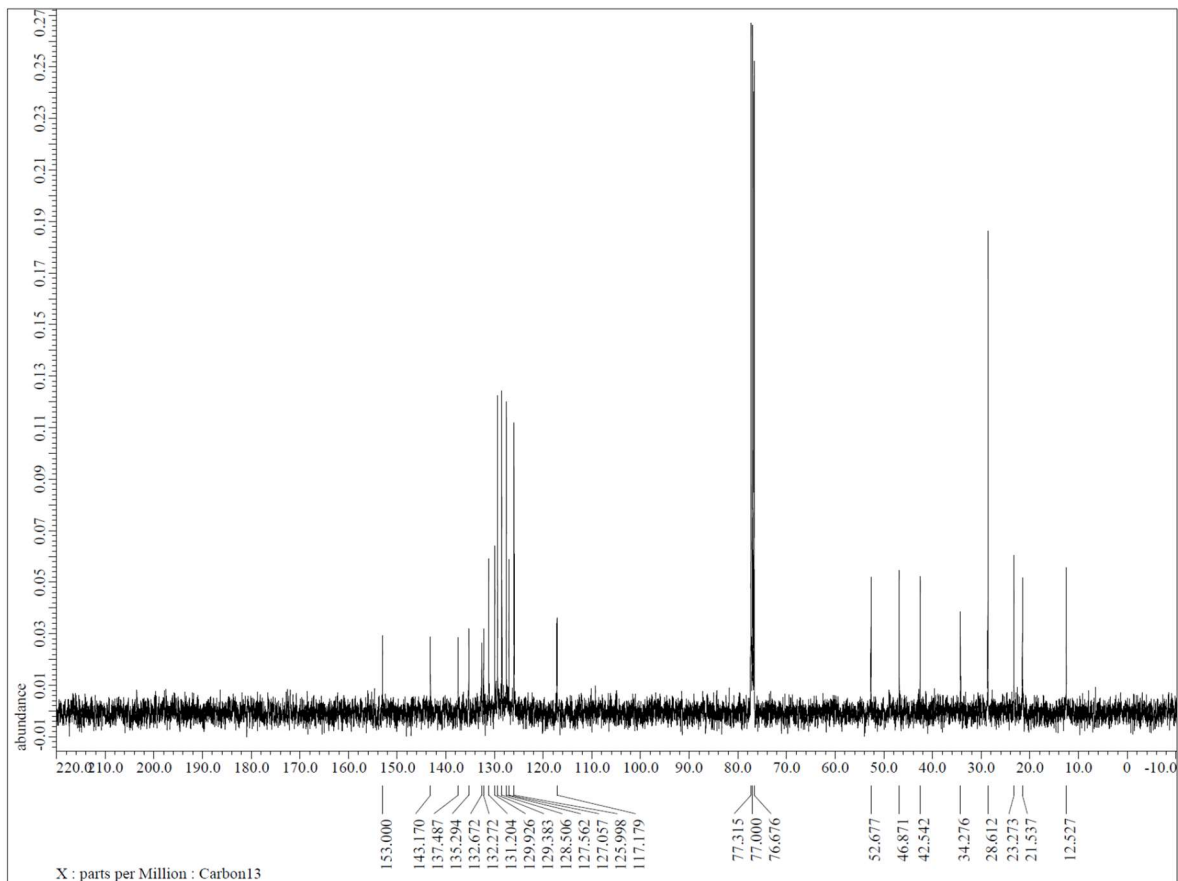

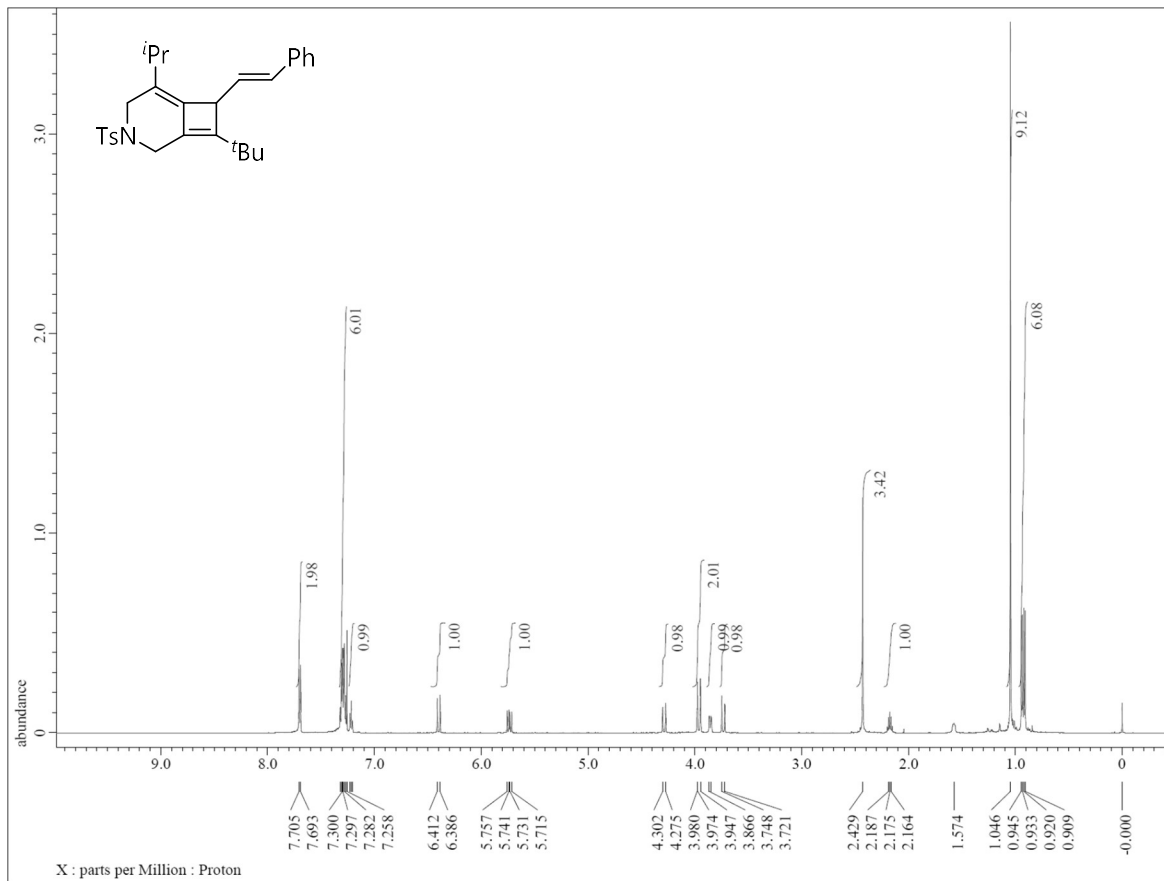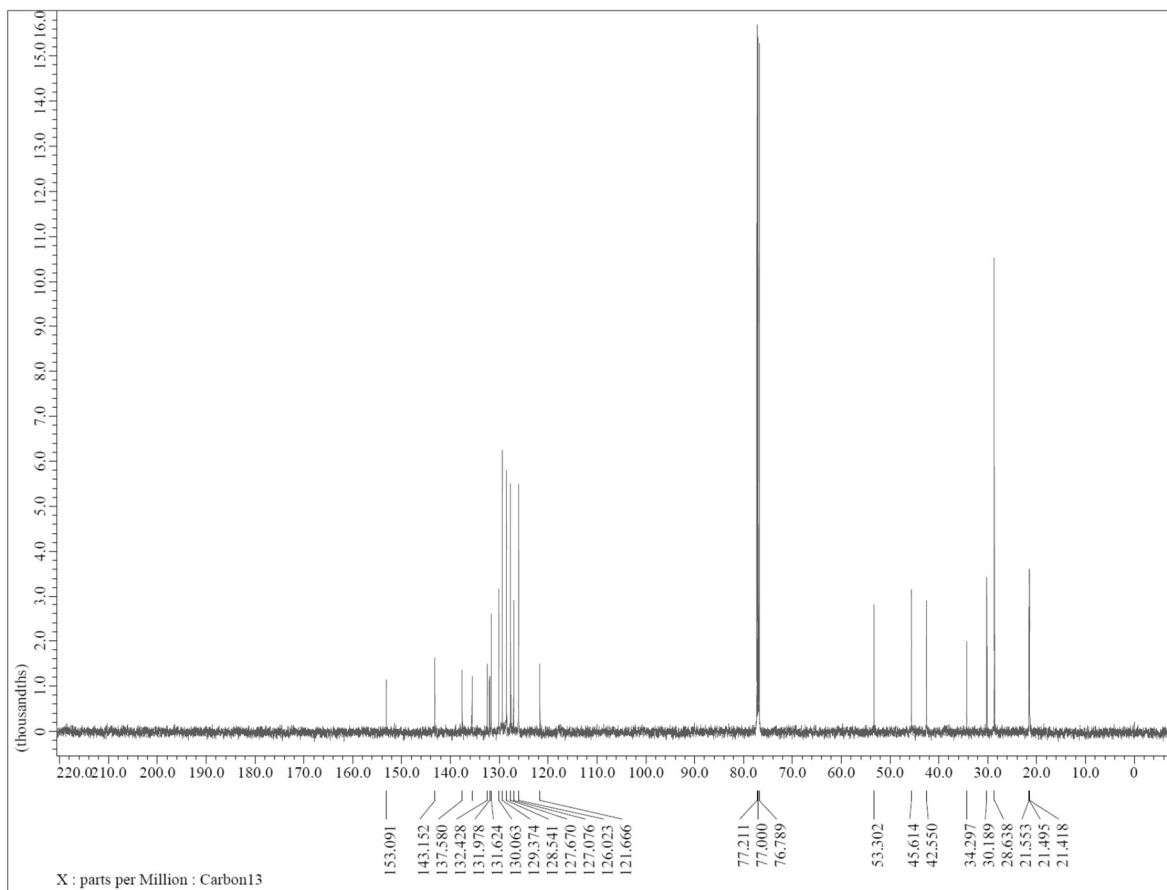

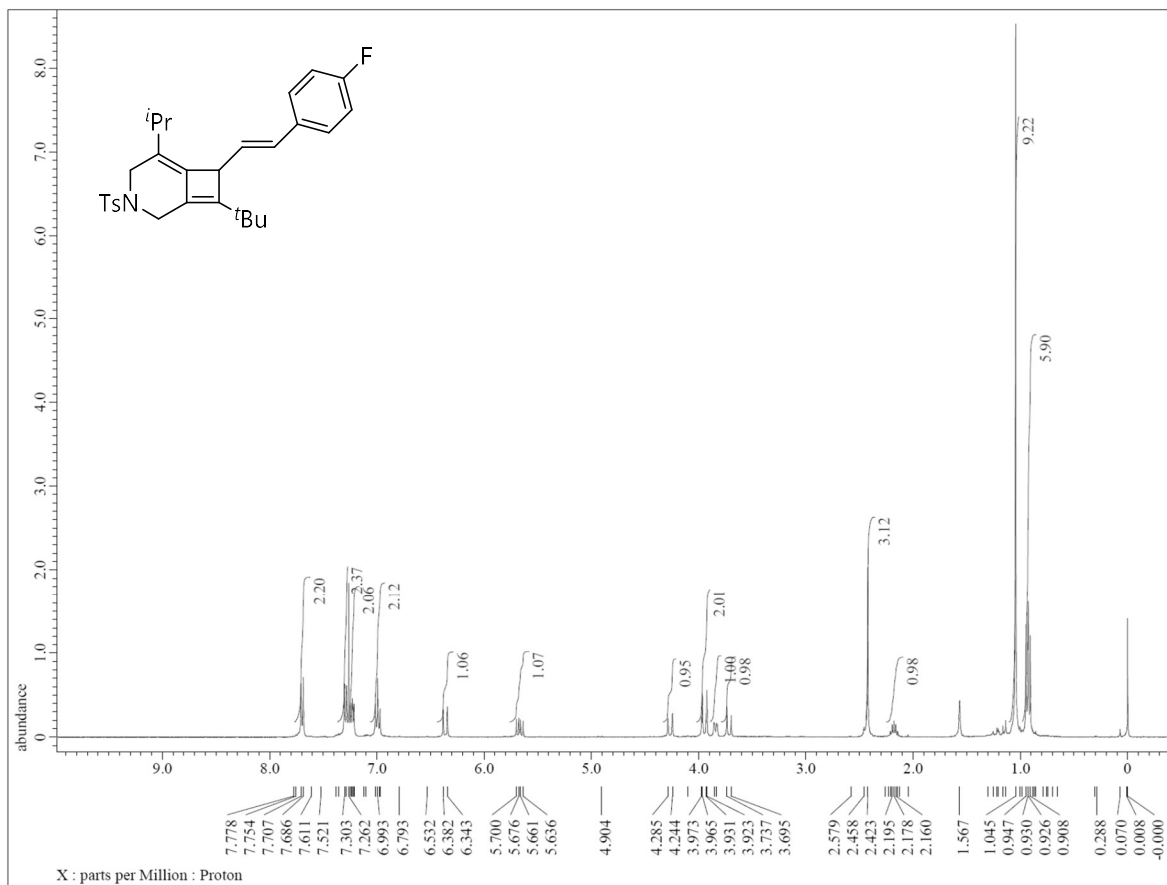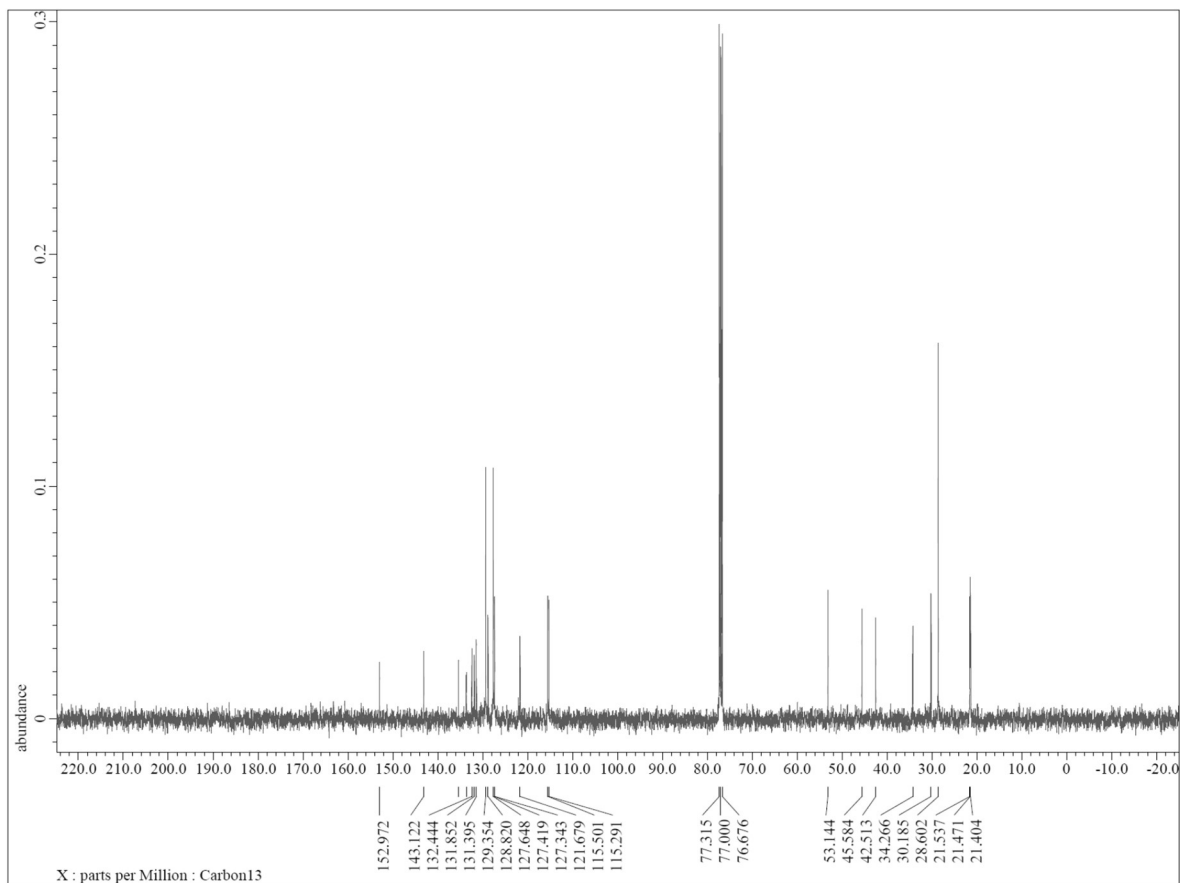



$^{19}\text{F}$  NMR (376 MHz,  $\text{CDCl}_3$ )

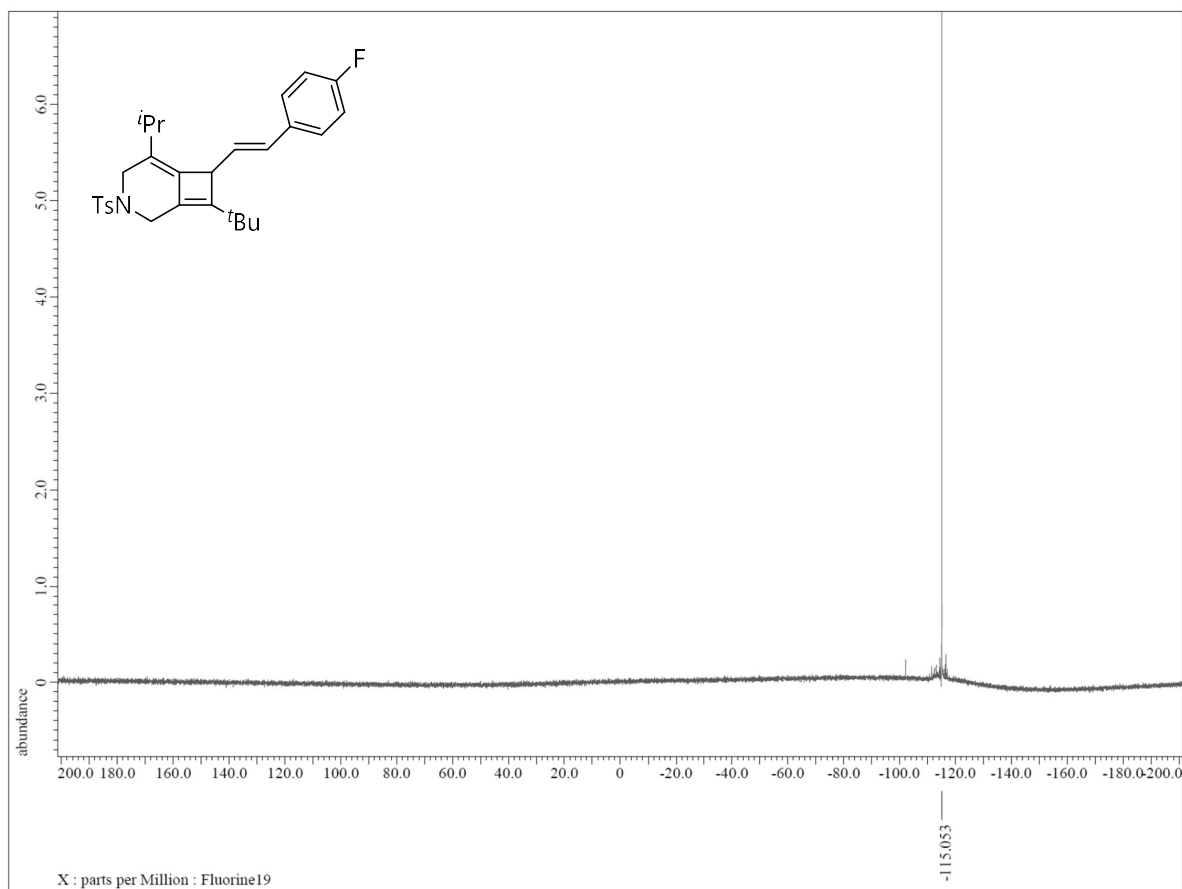

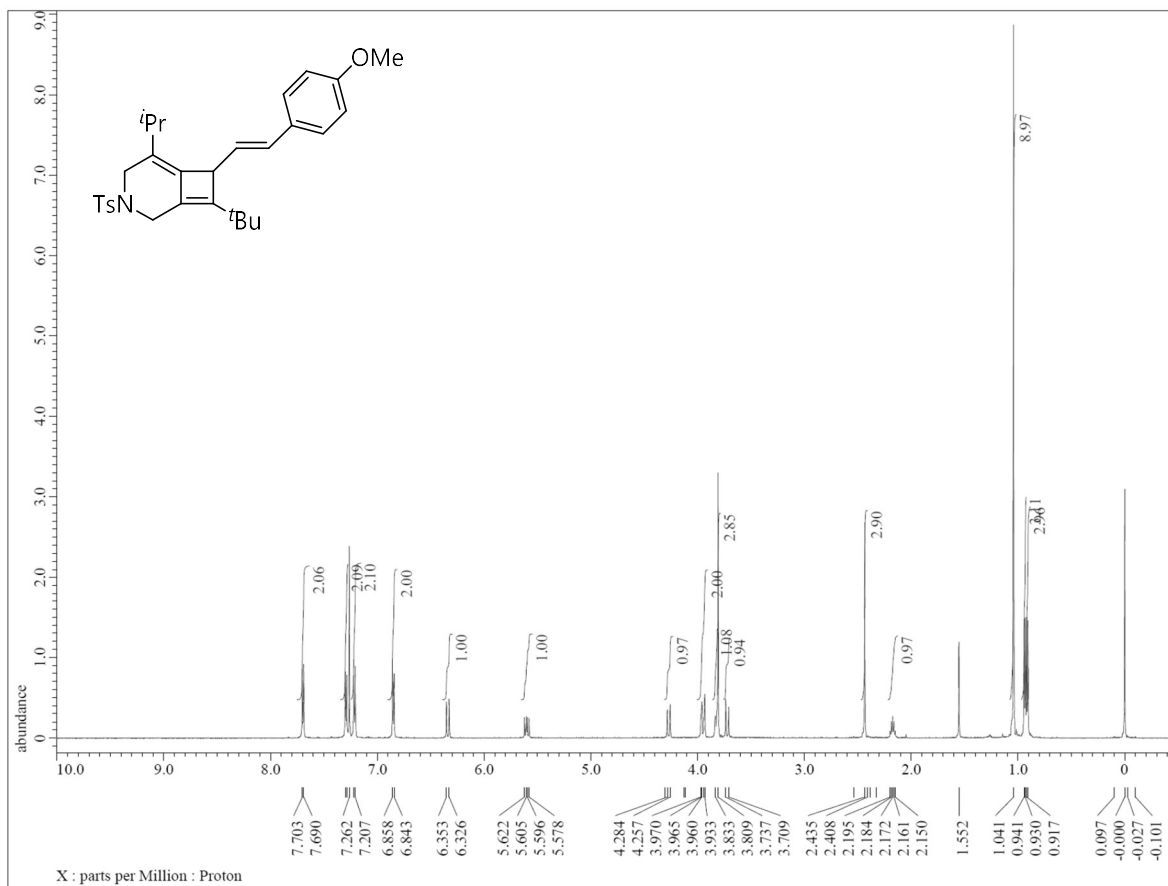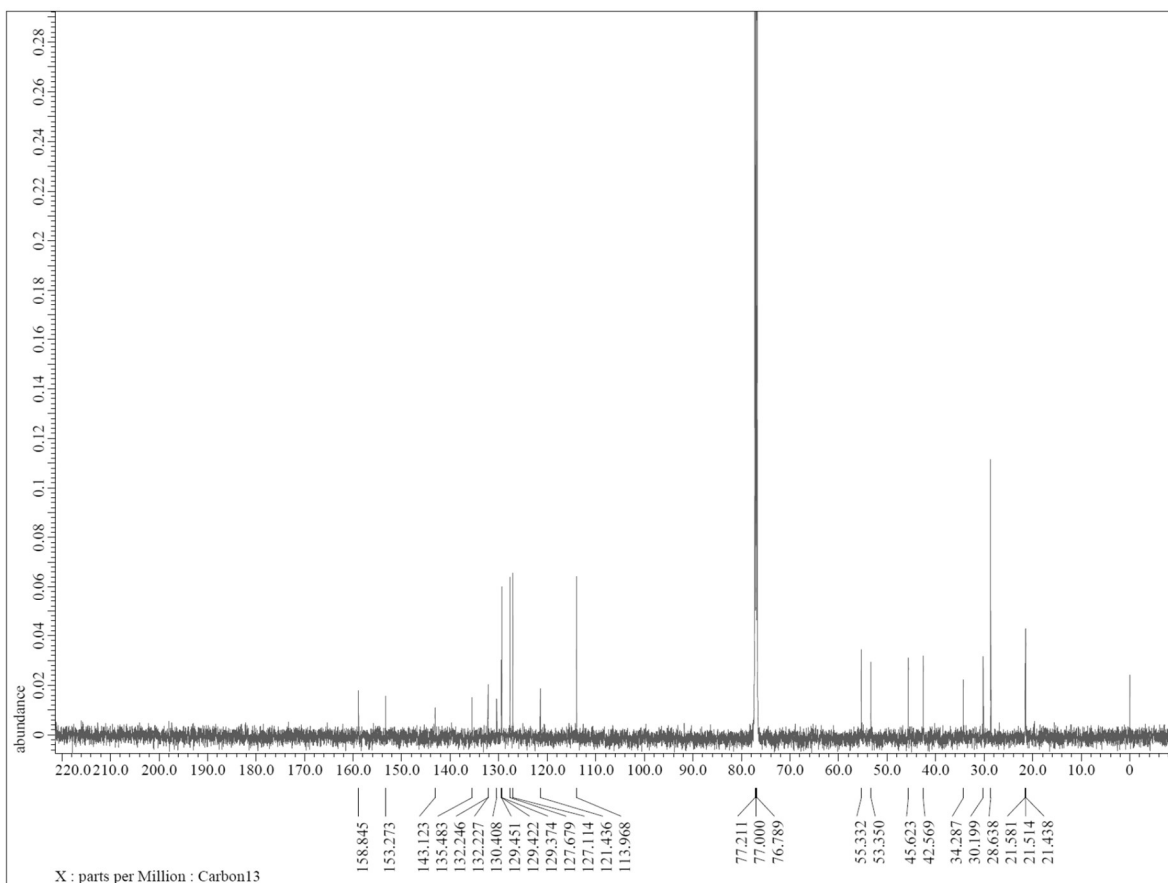

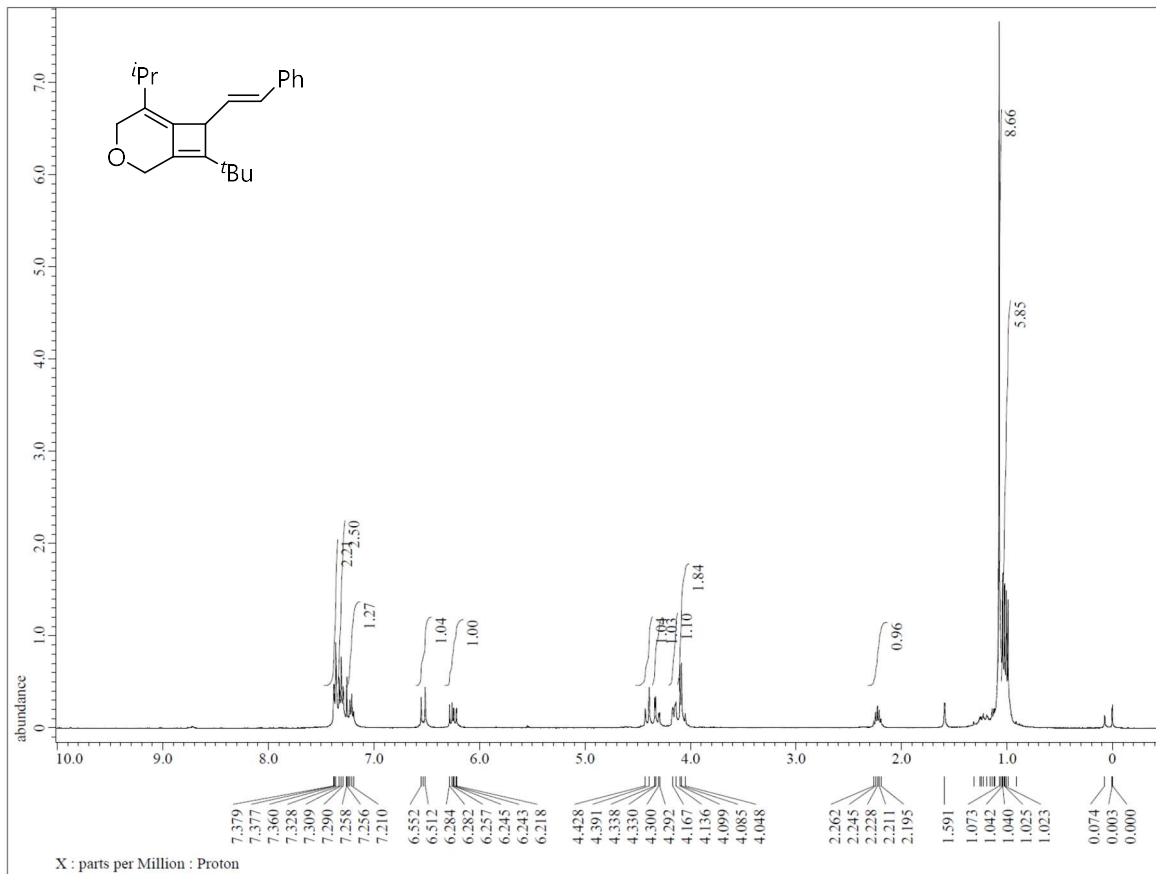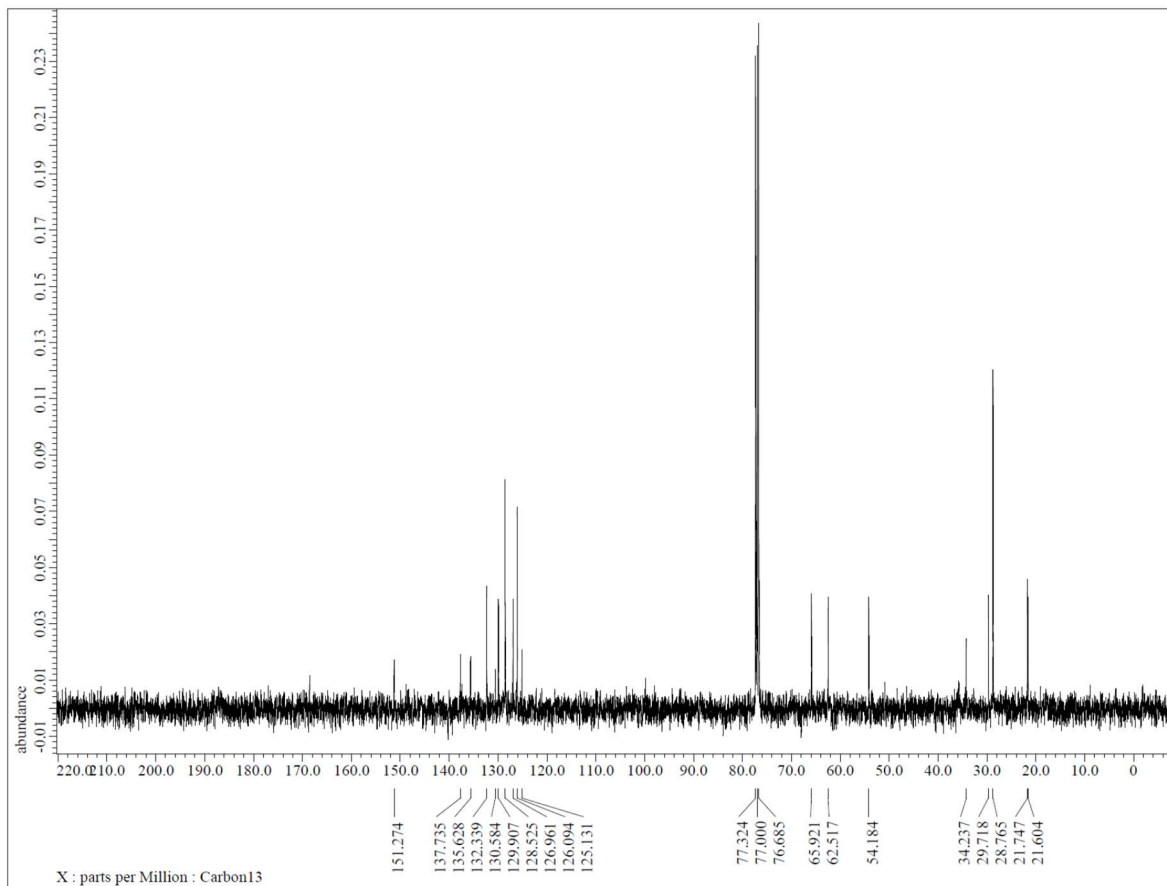

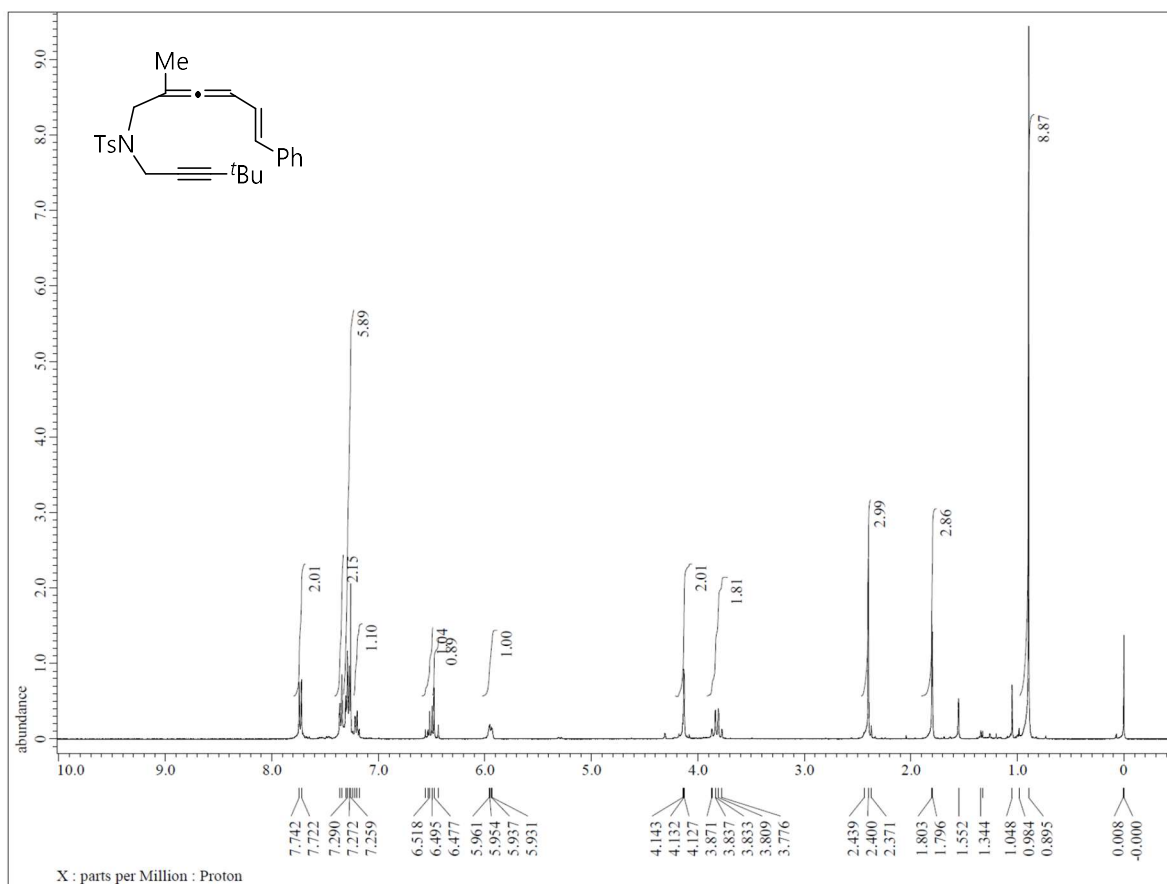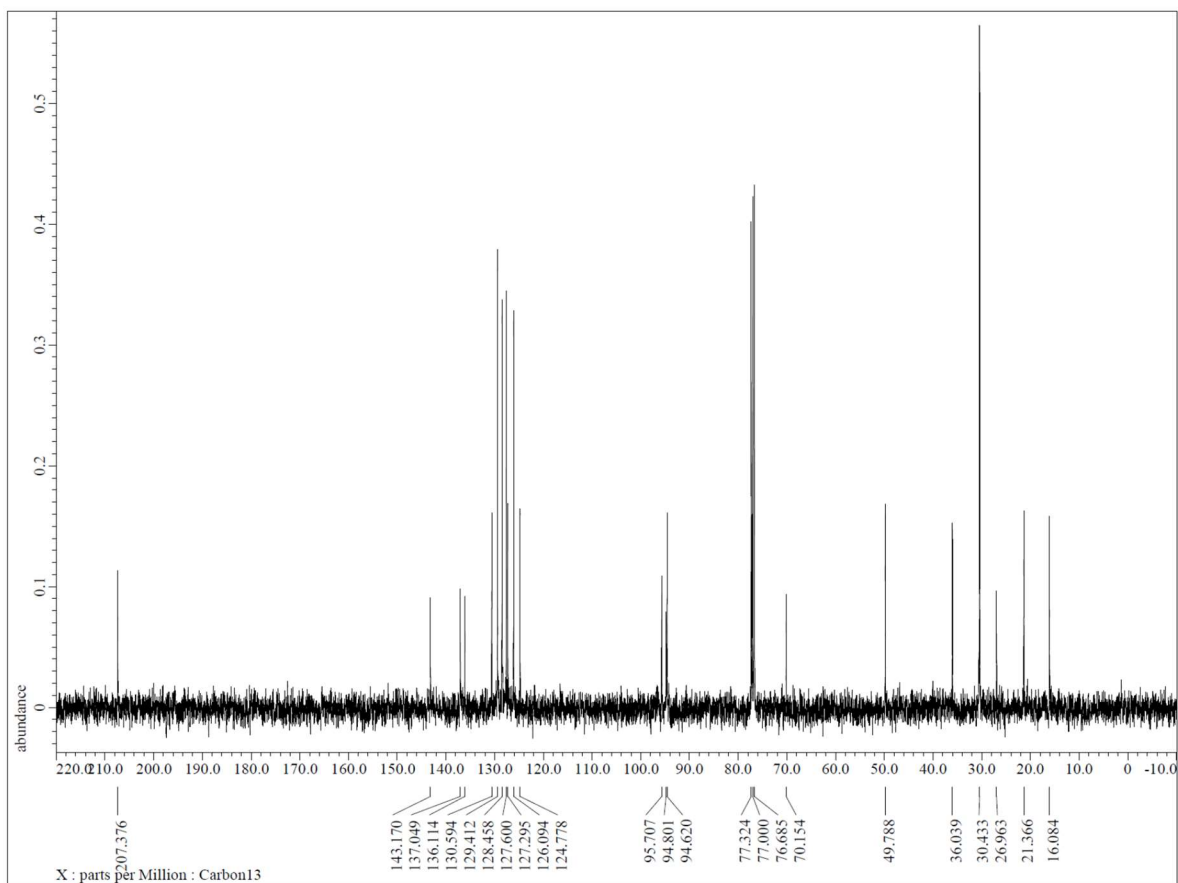

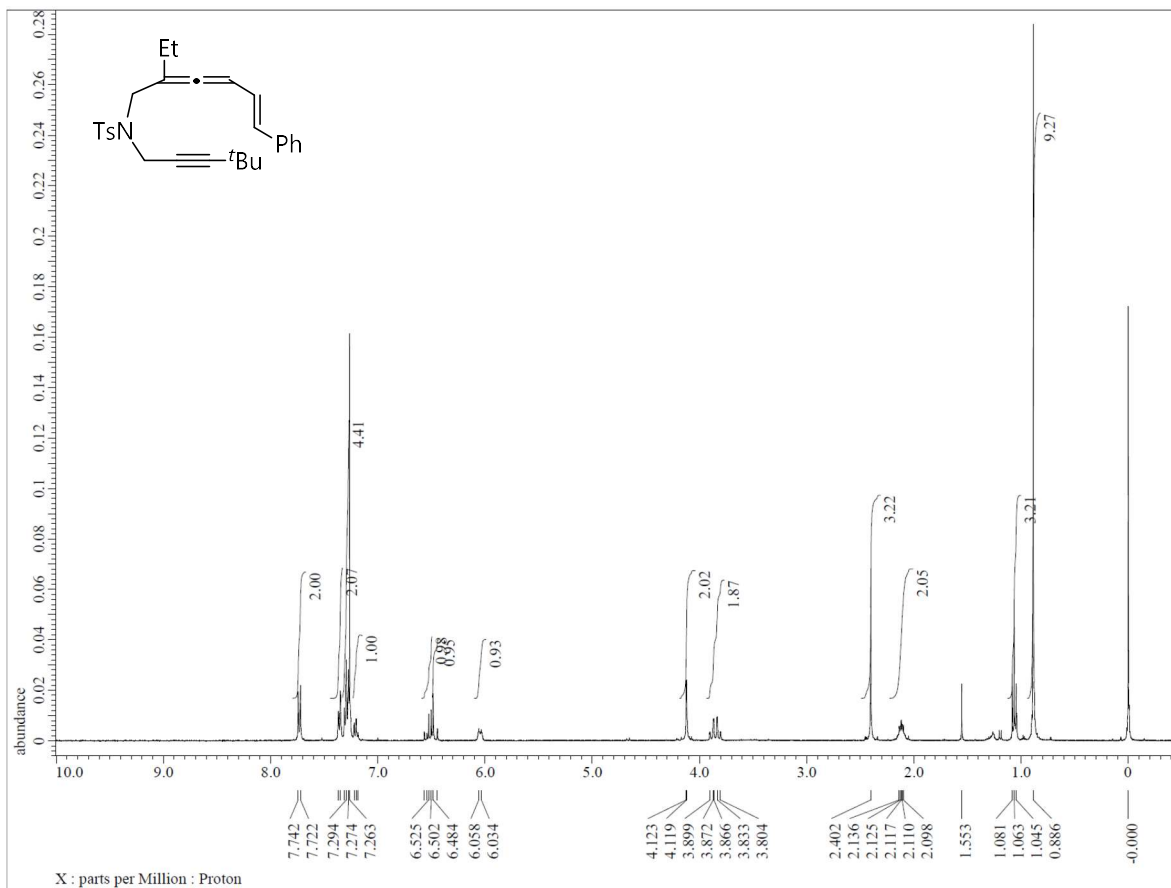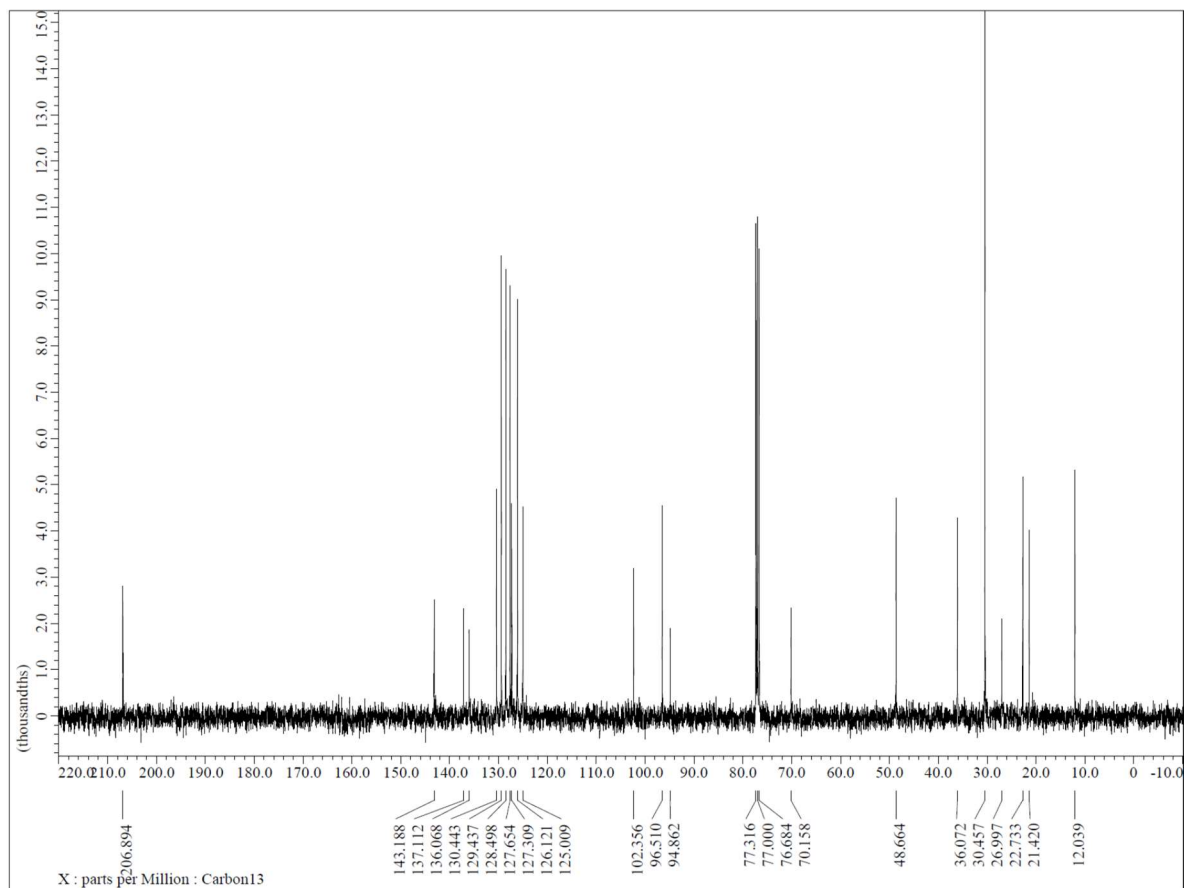

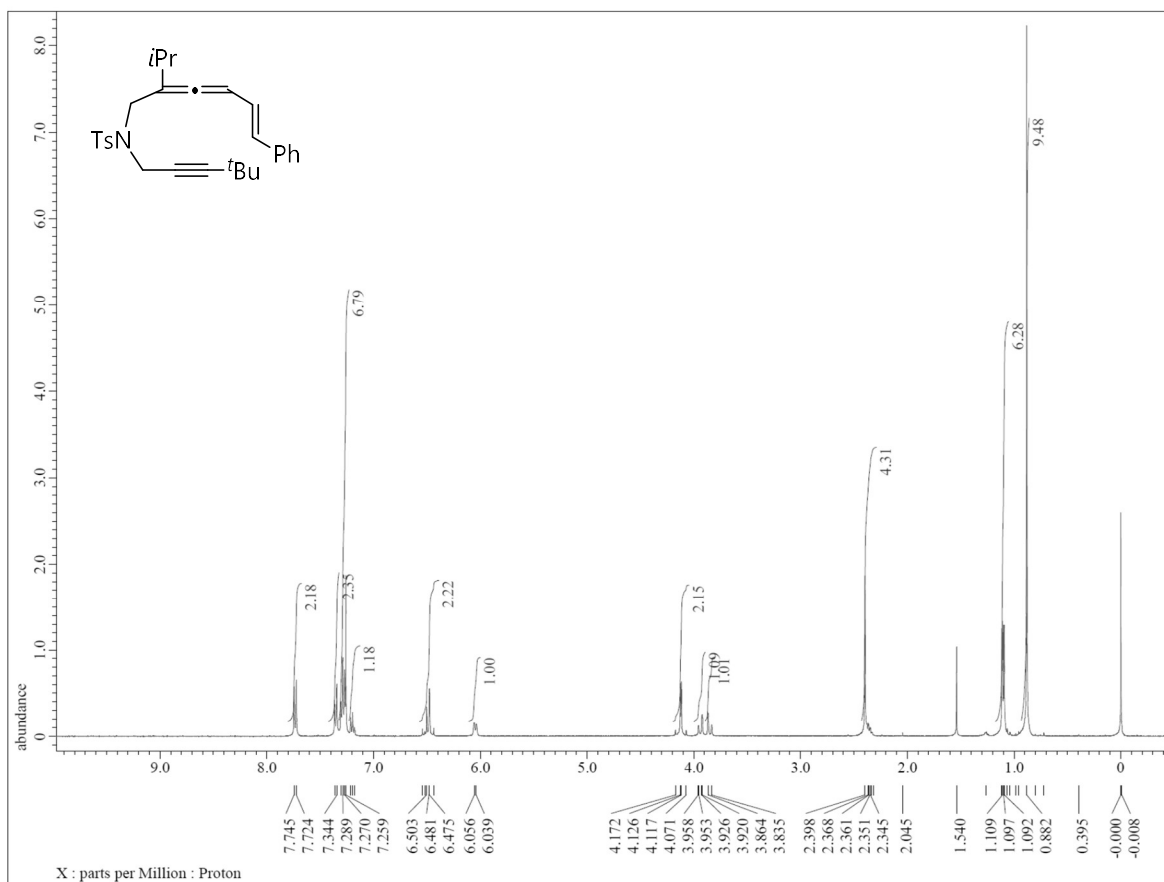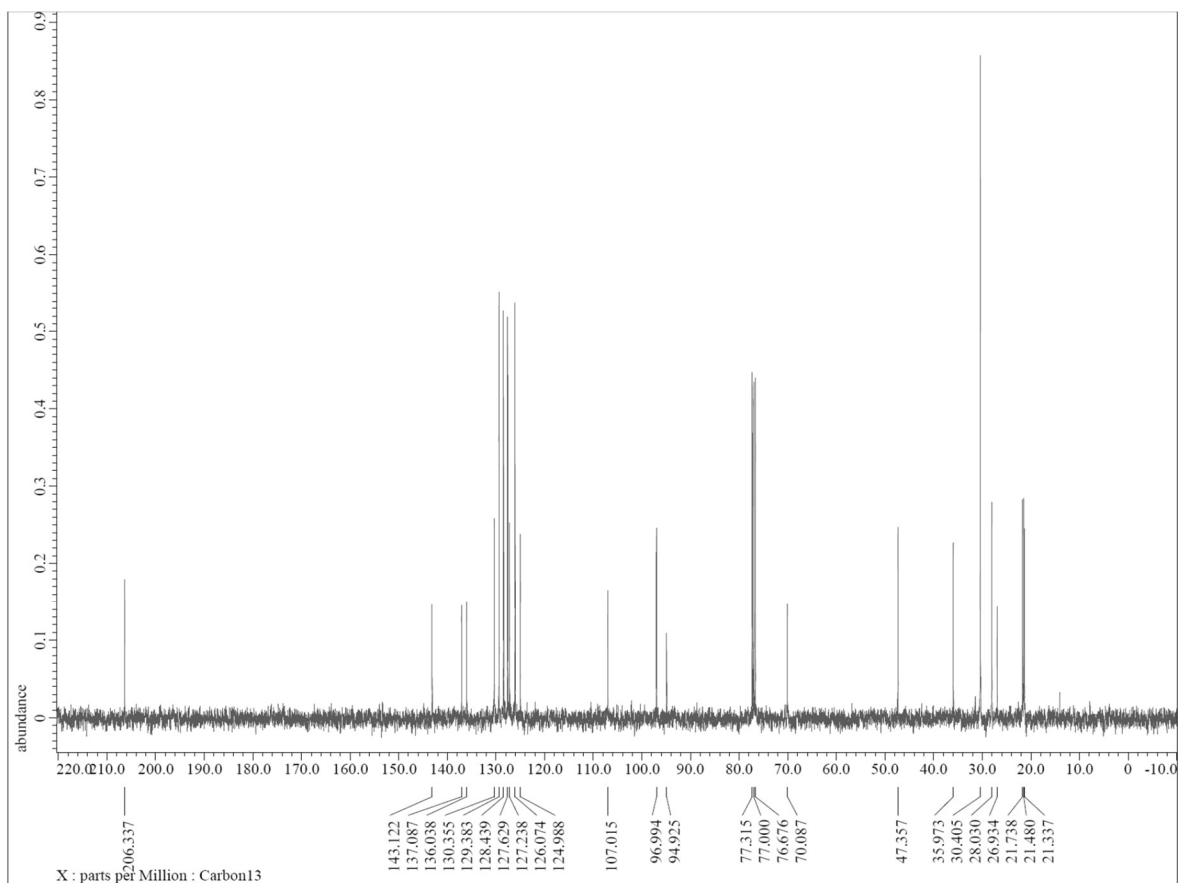

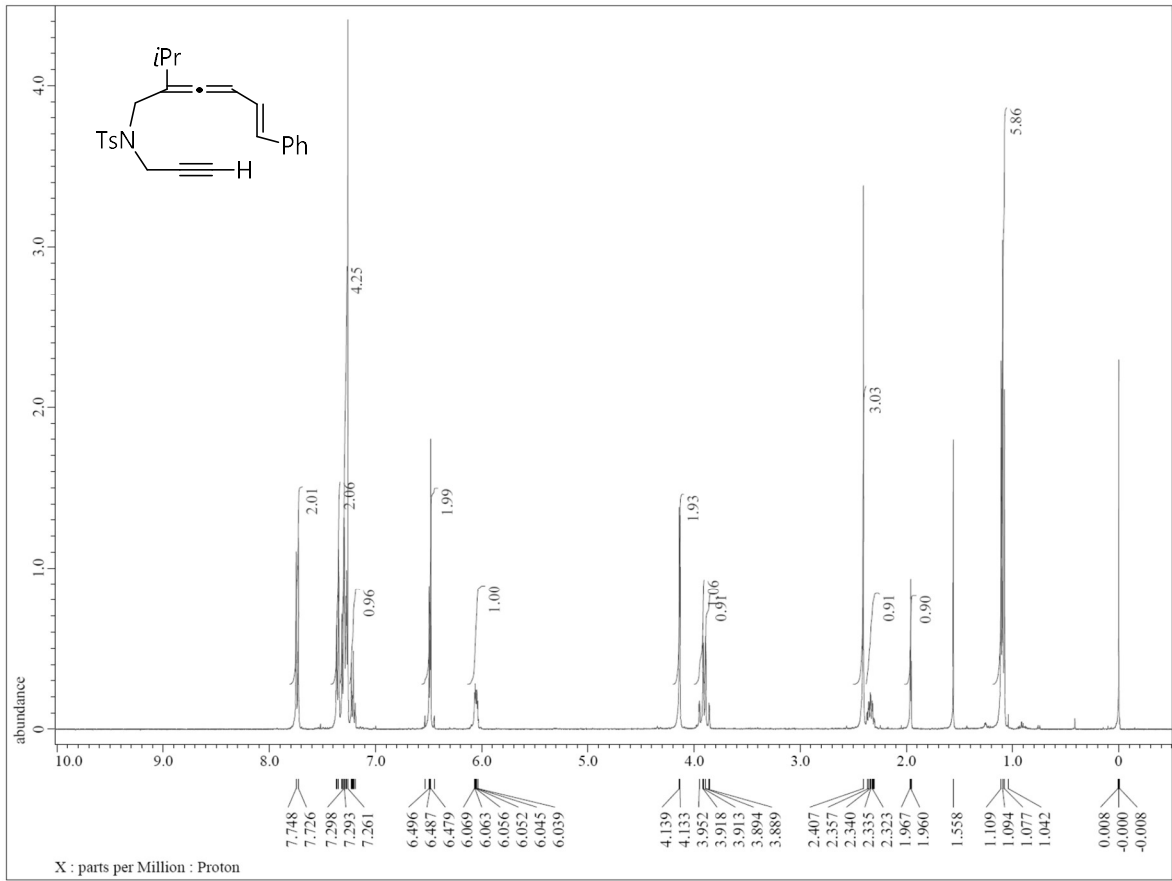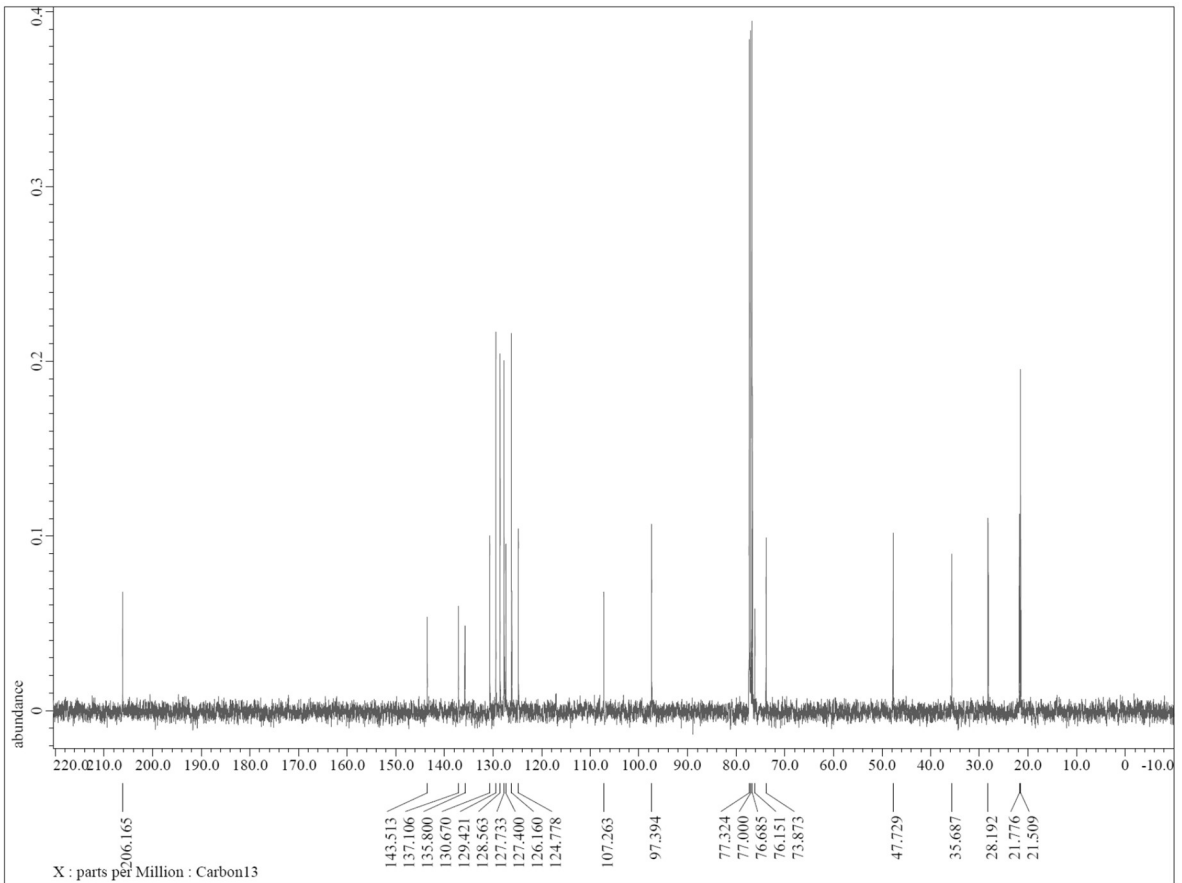

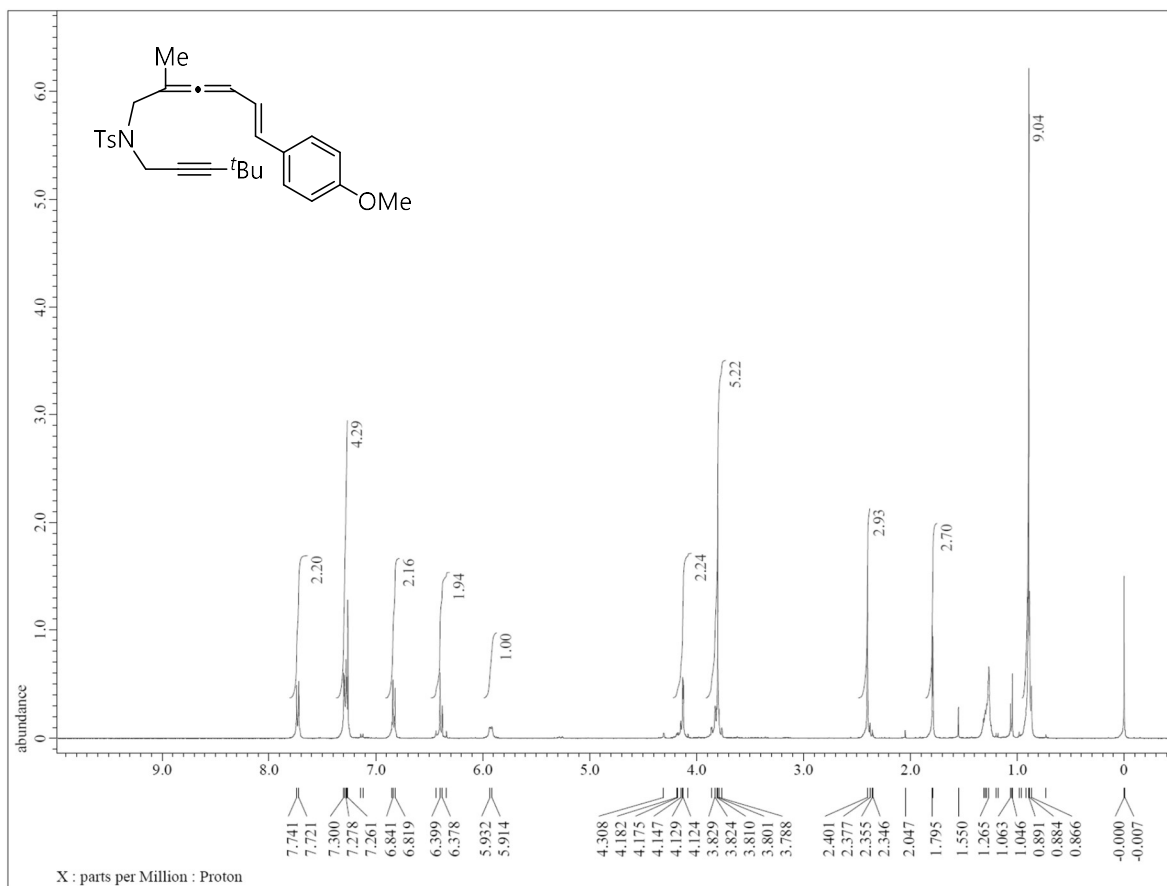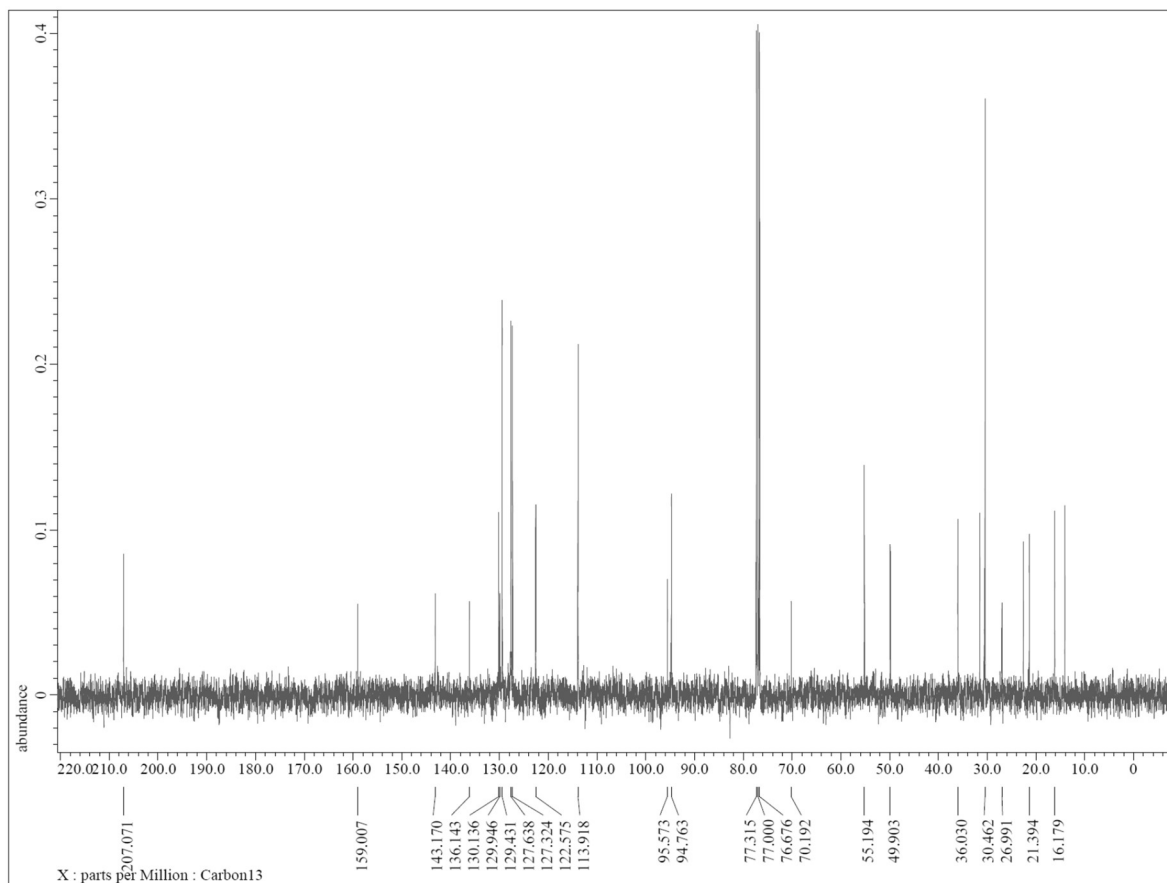



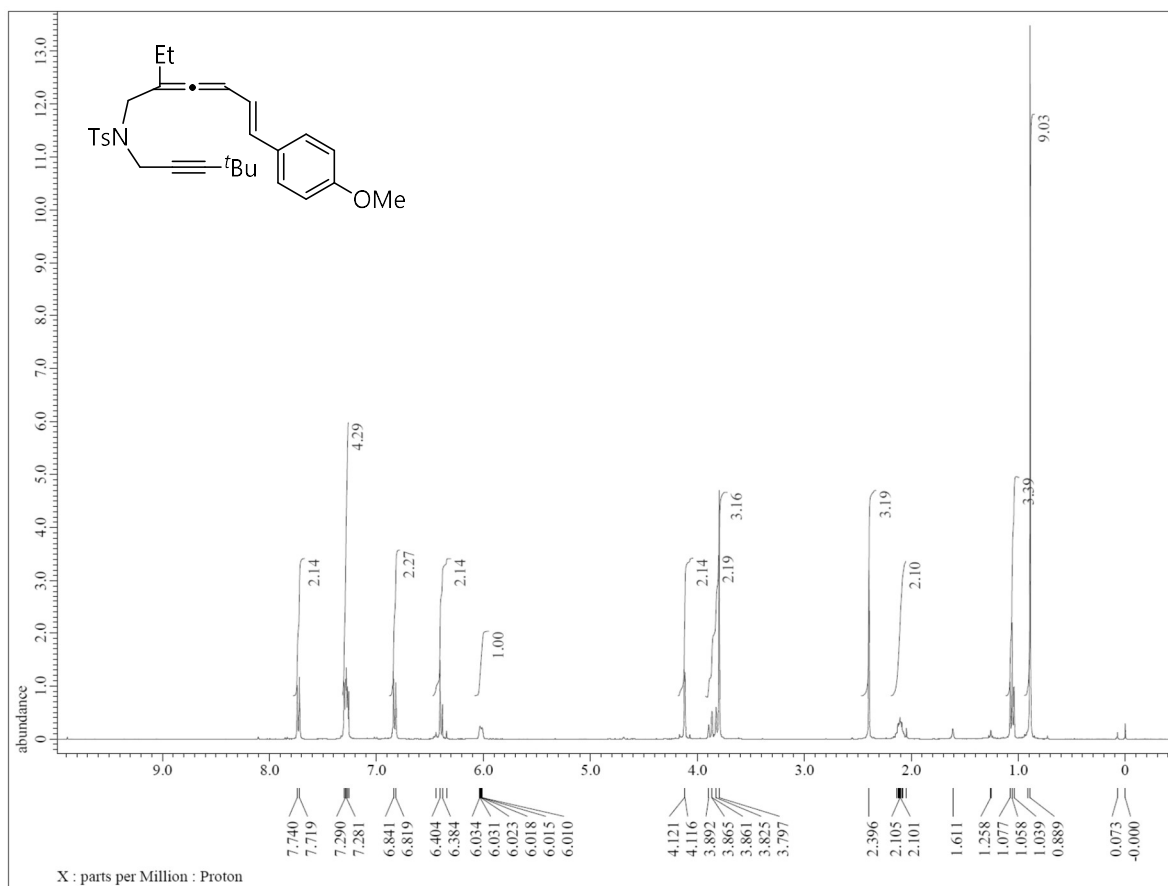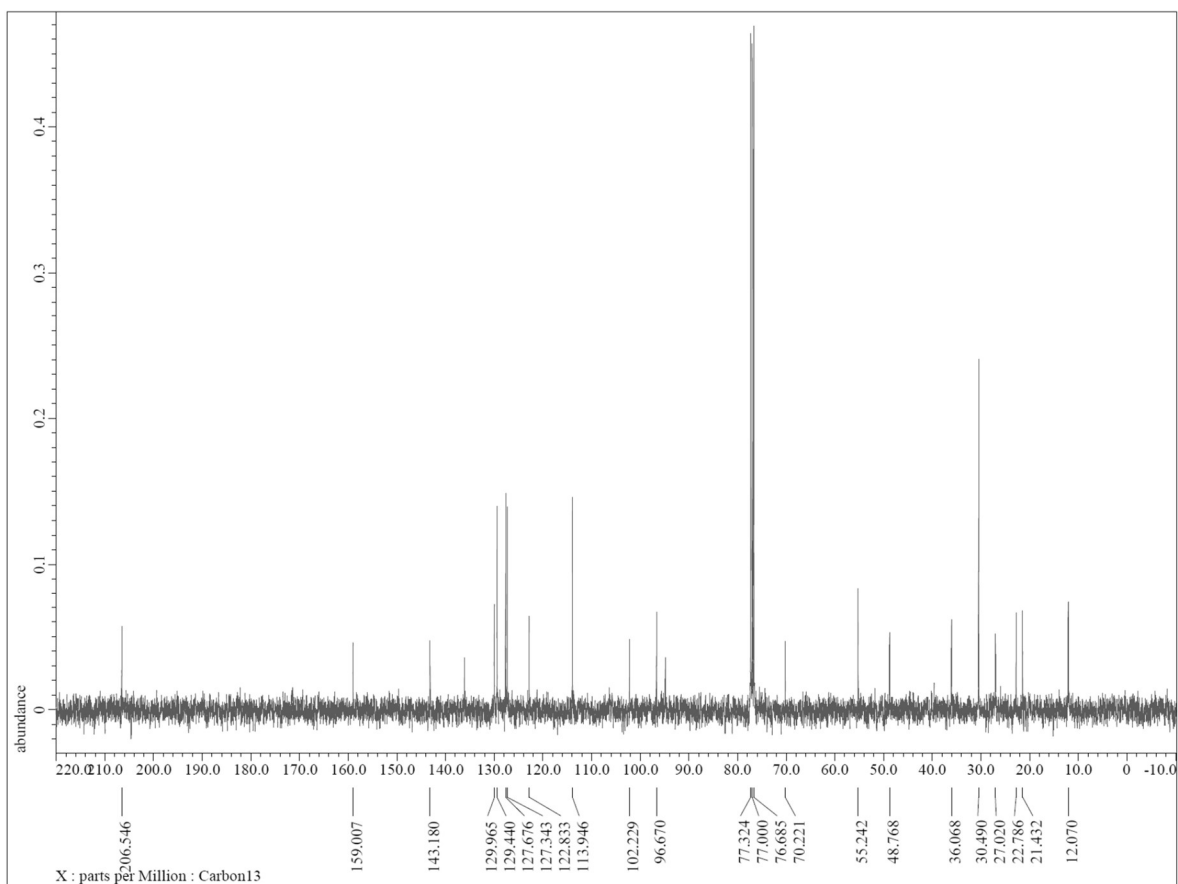

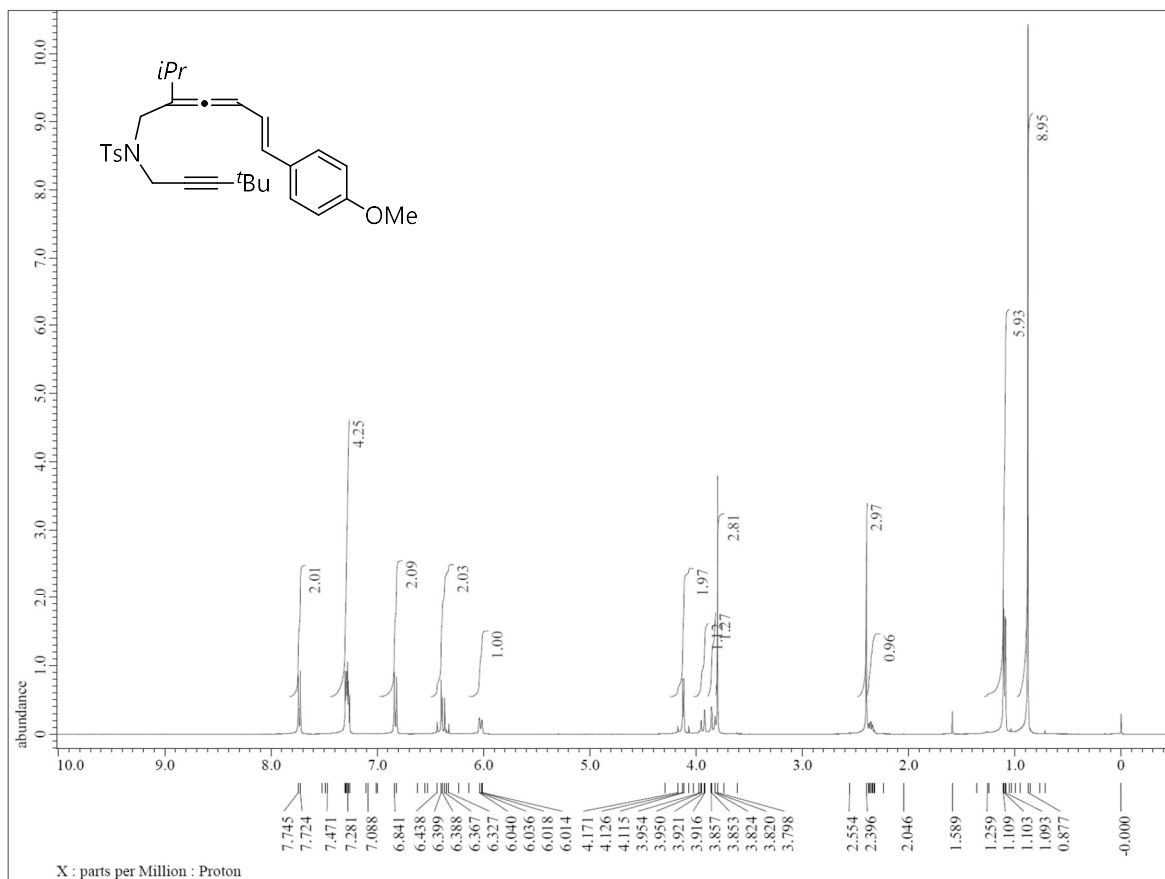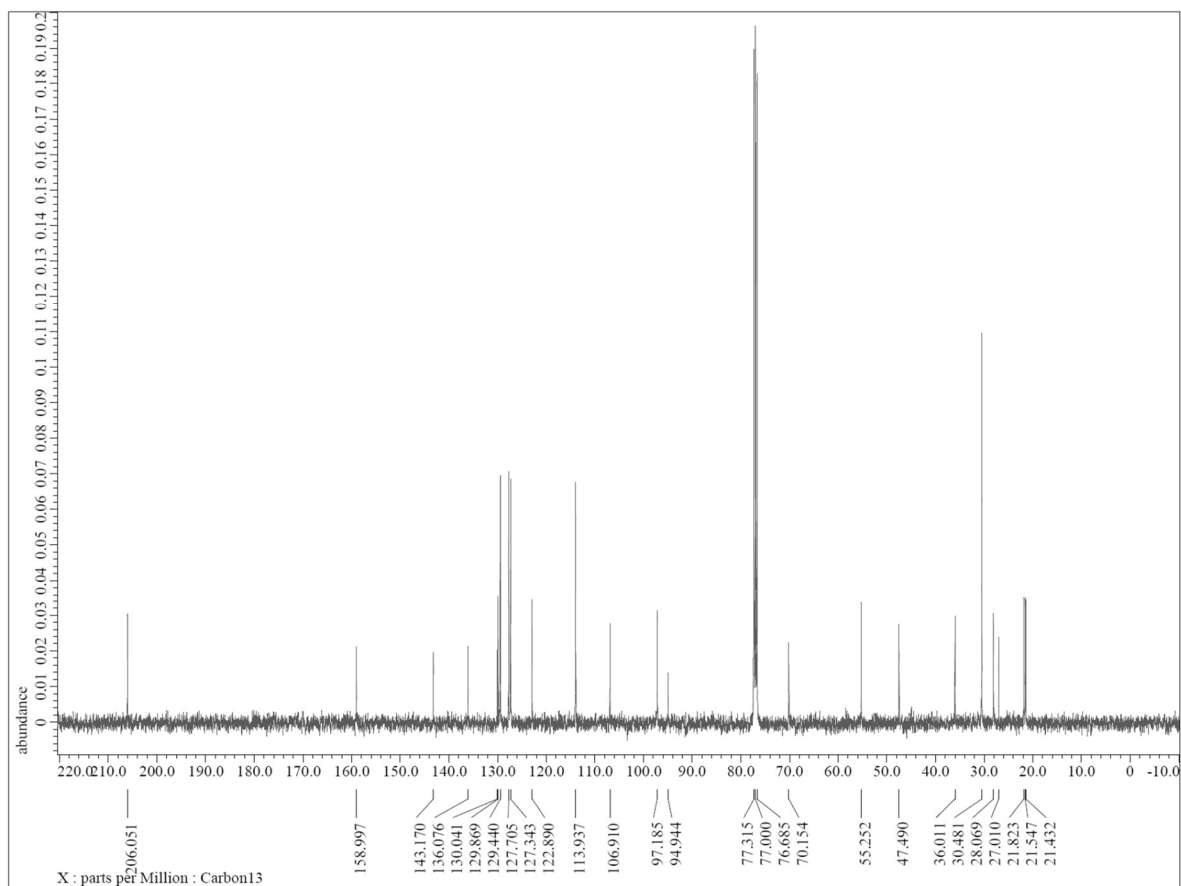

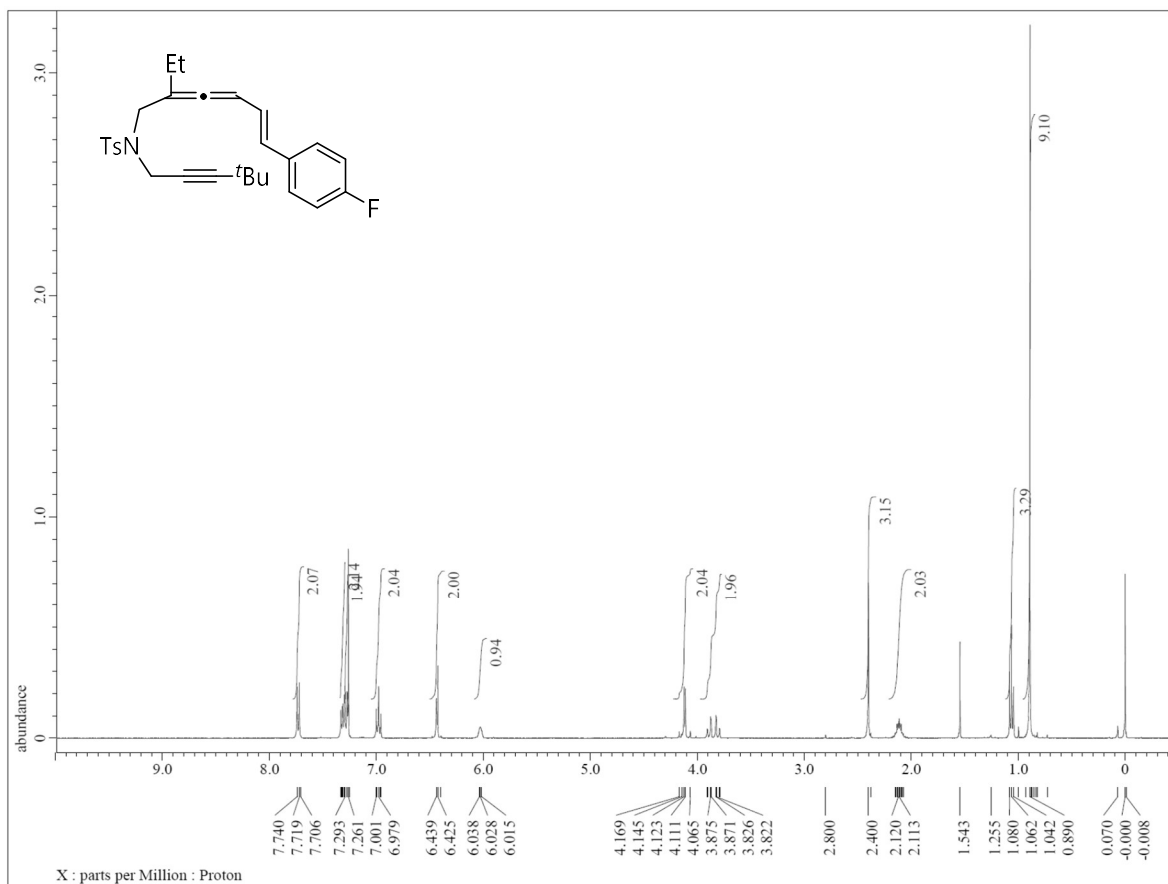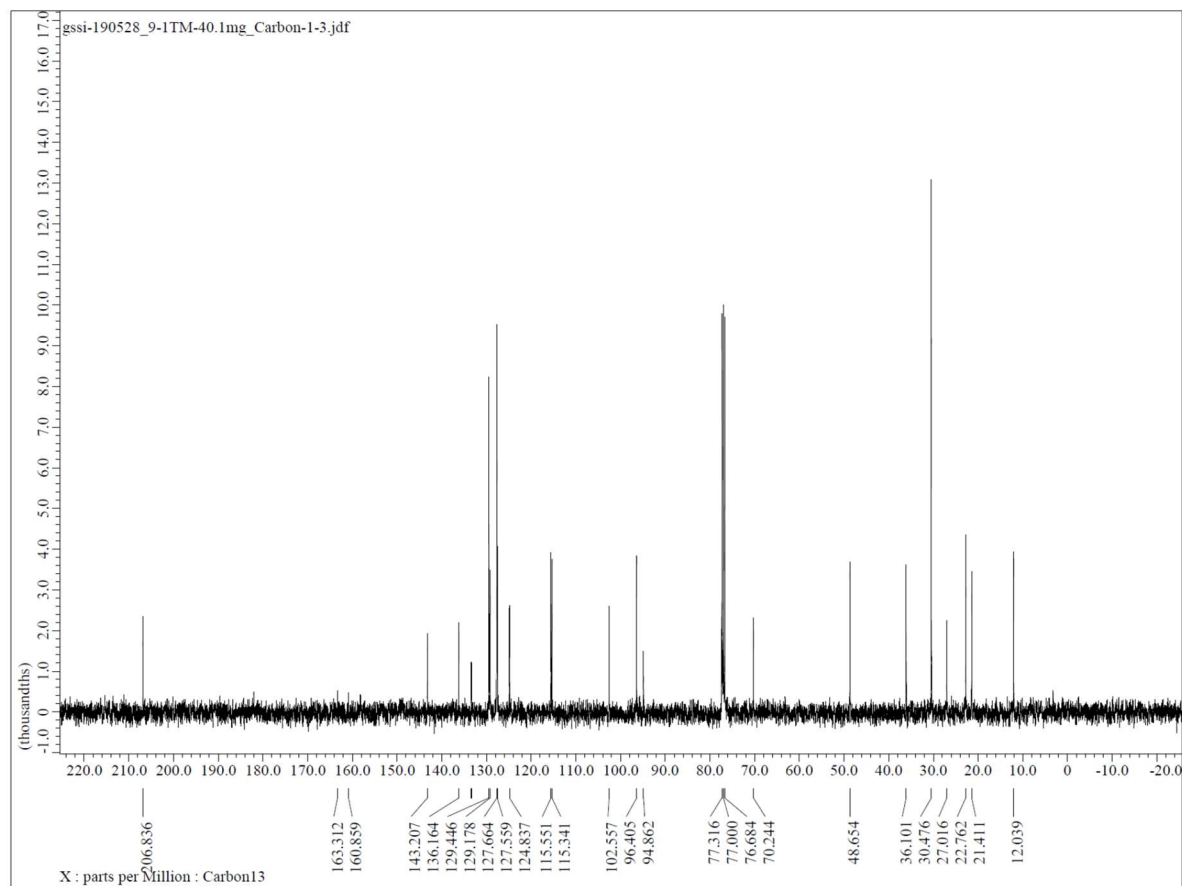

$^{19}\text{F}$  NMR (376 MHz,  $\text{CDCl}_3$ )

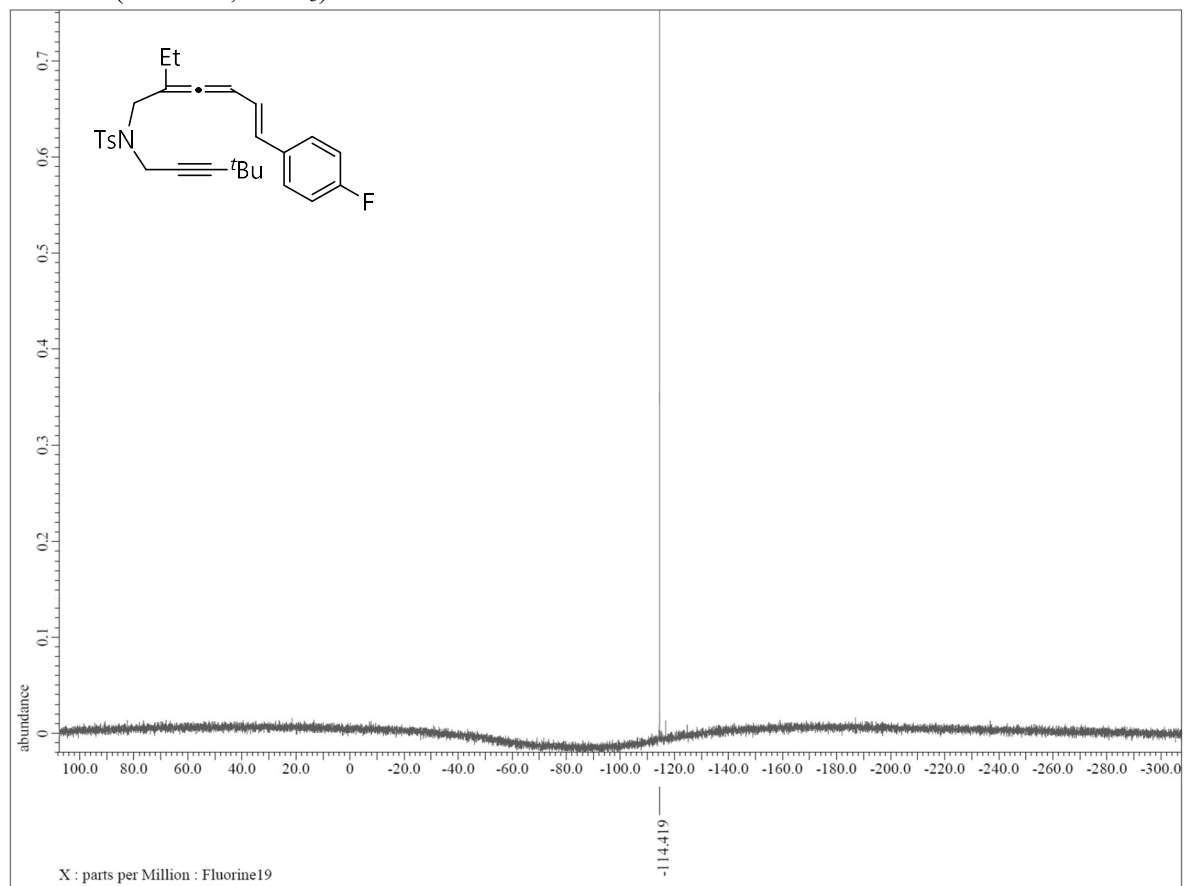

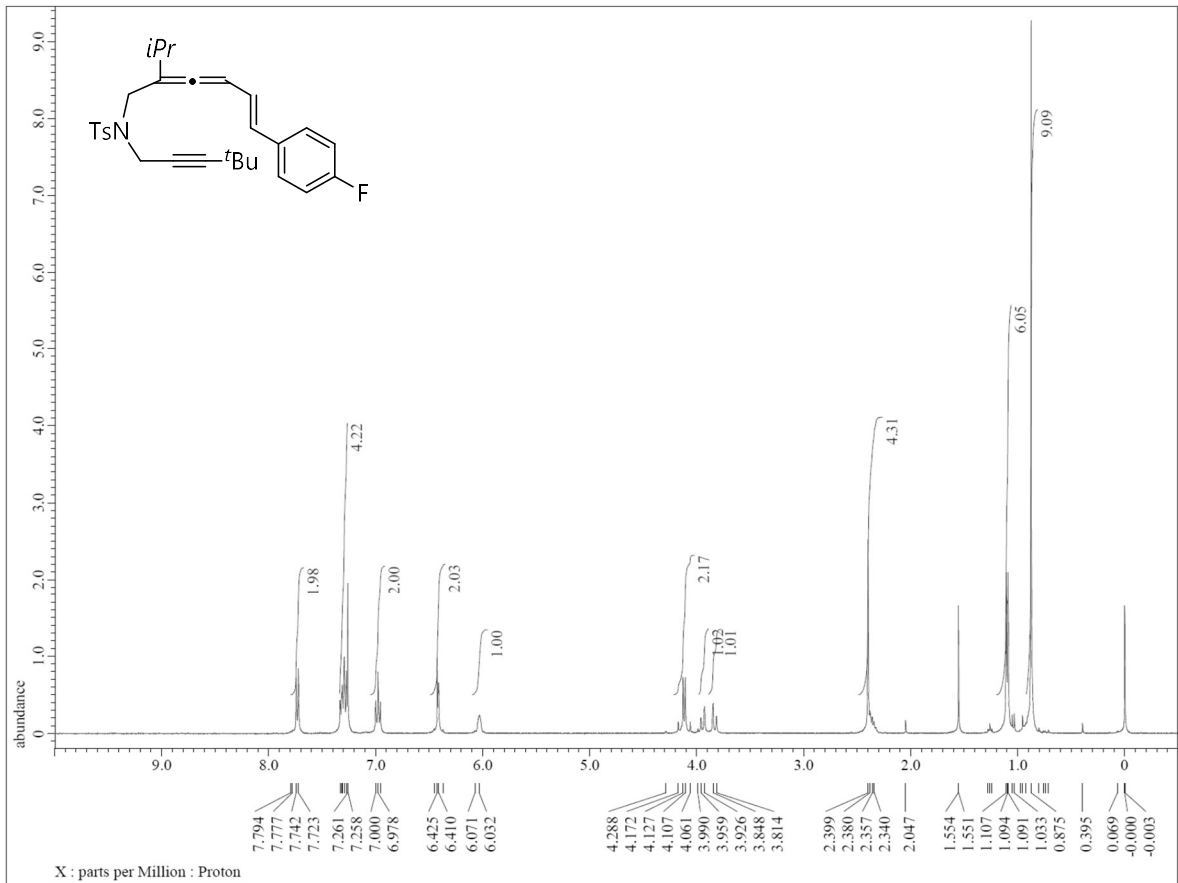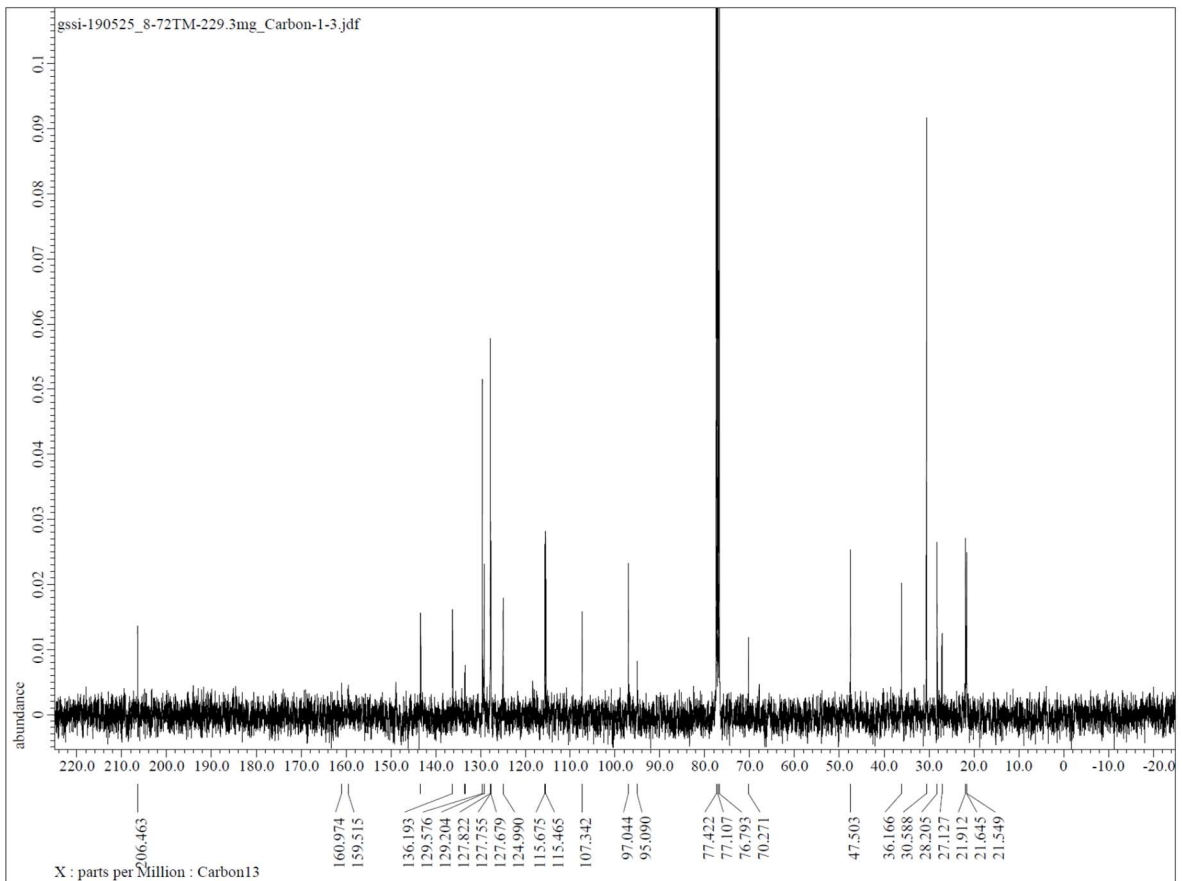

$^{19}\text{F}$  NMR (376 MHz,  $\text{CDCl}_3$ )

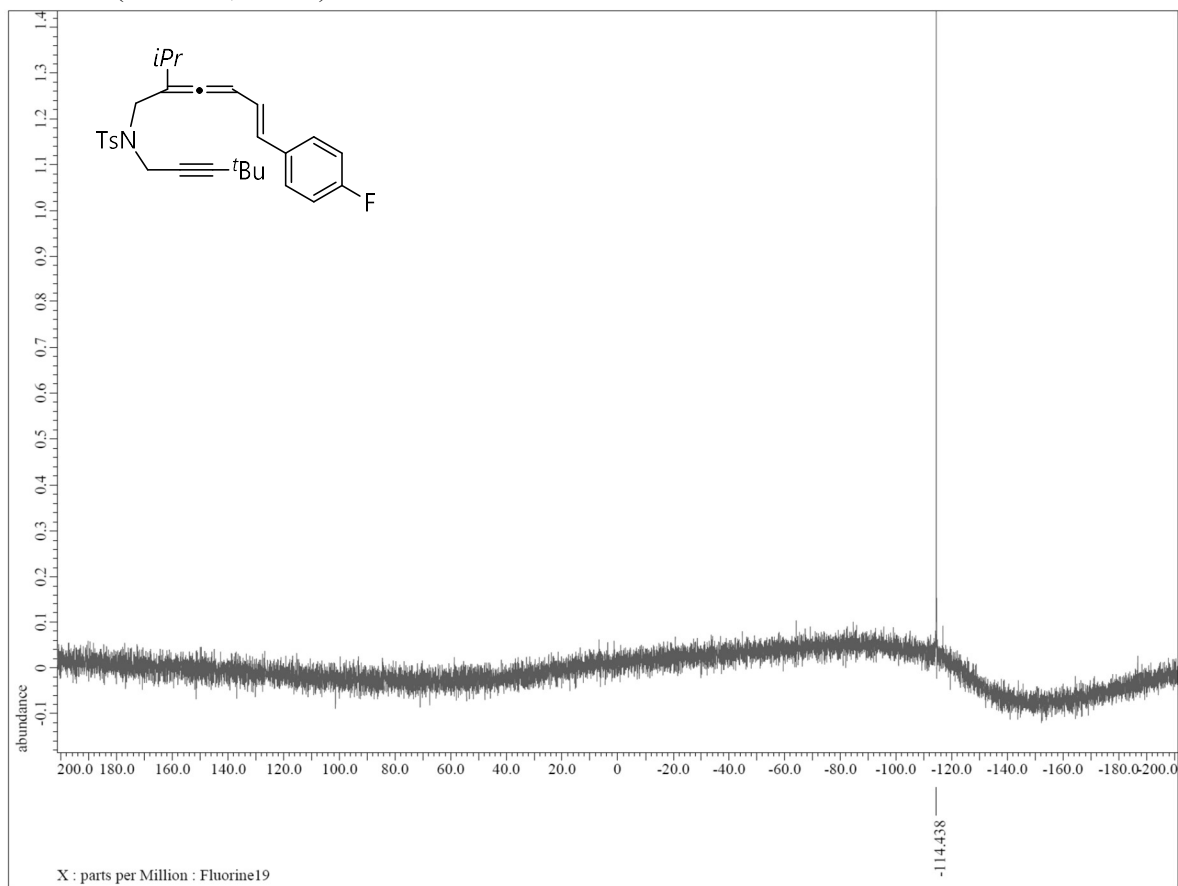

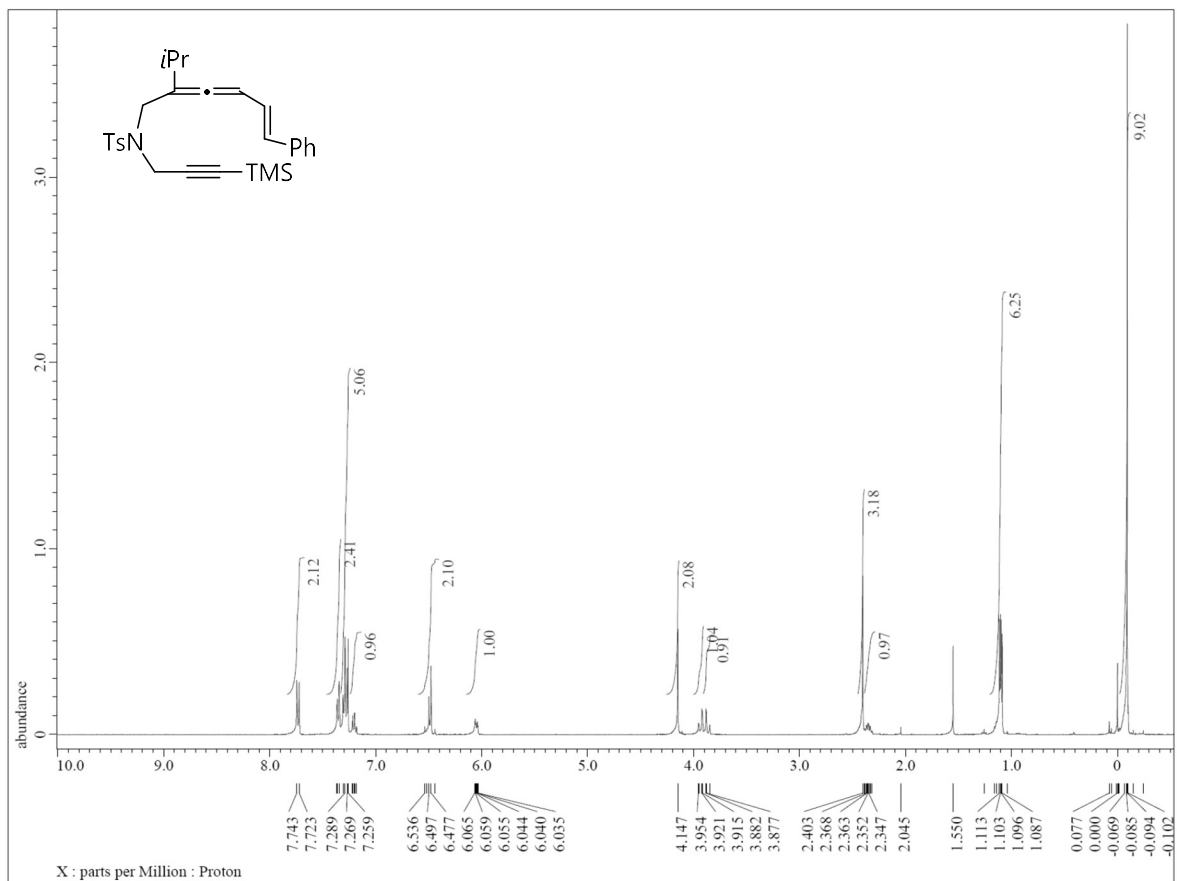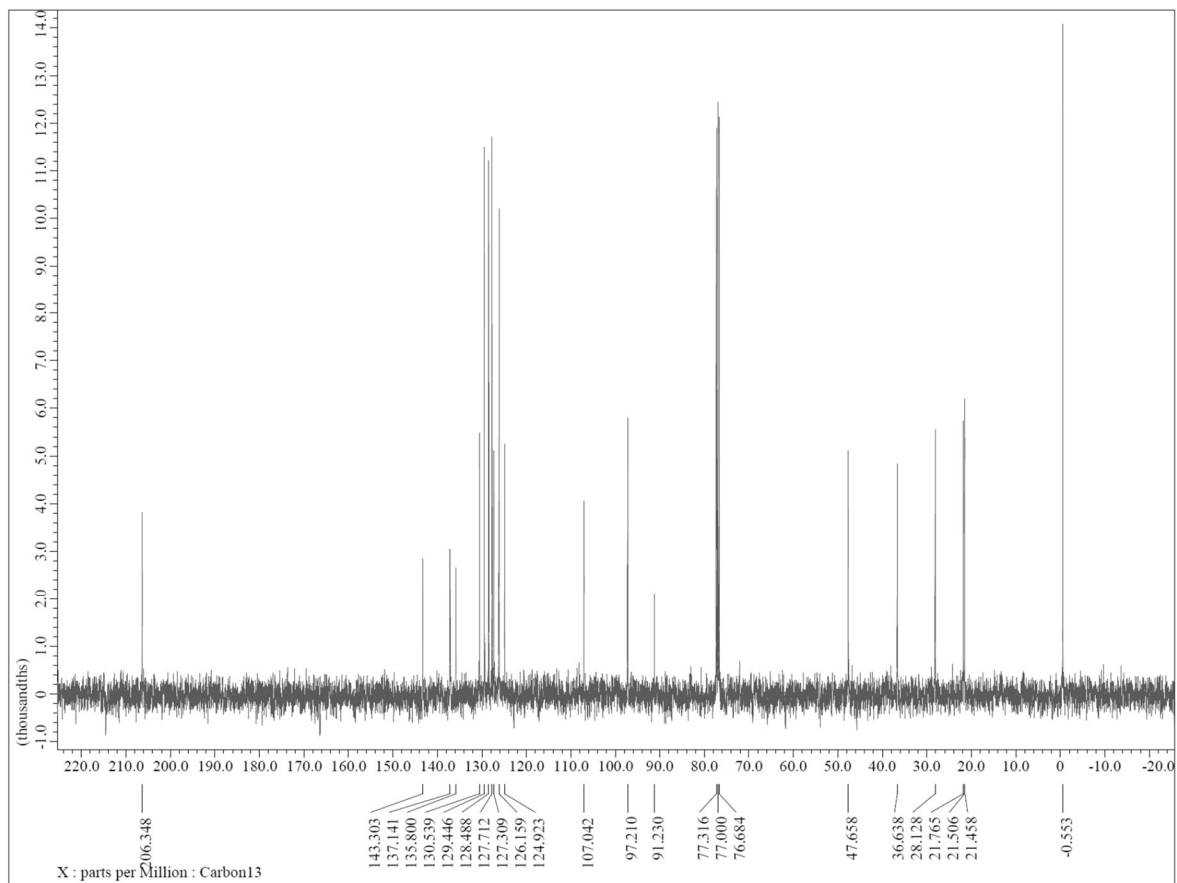

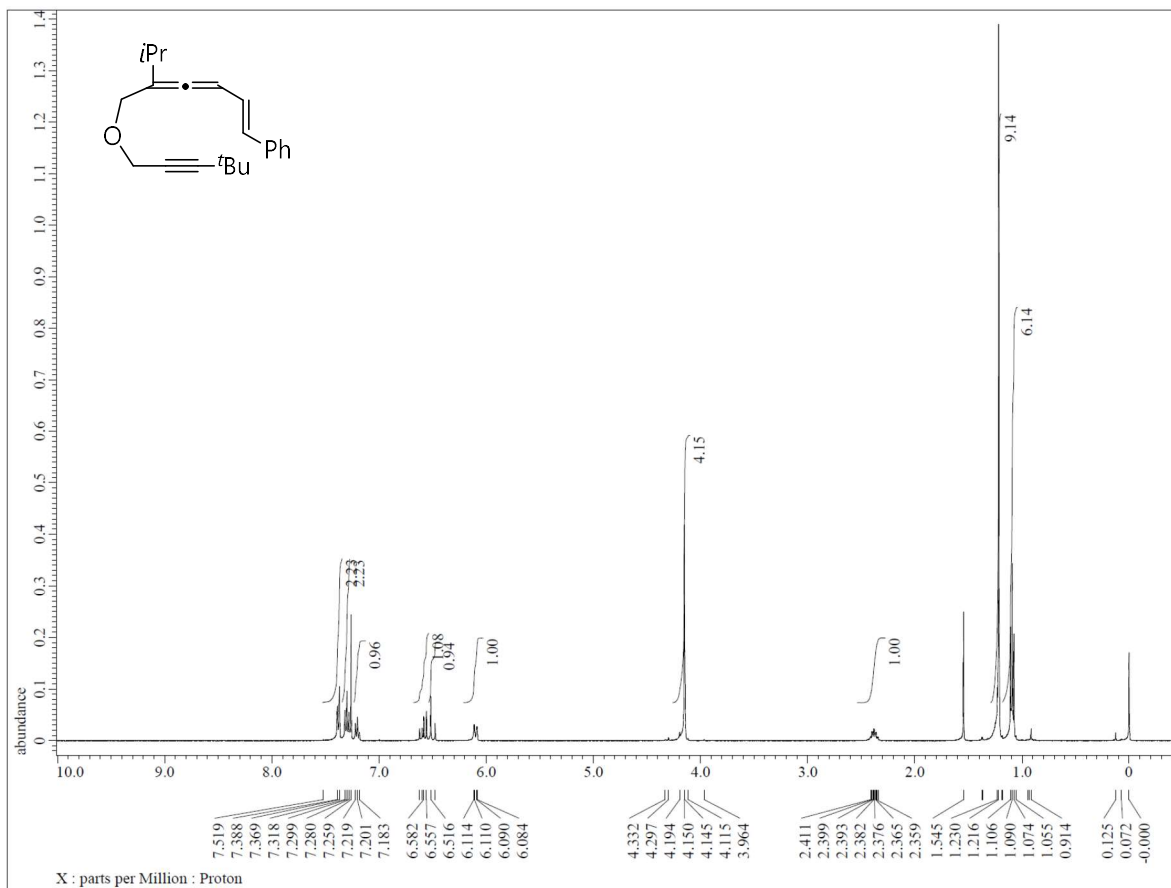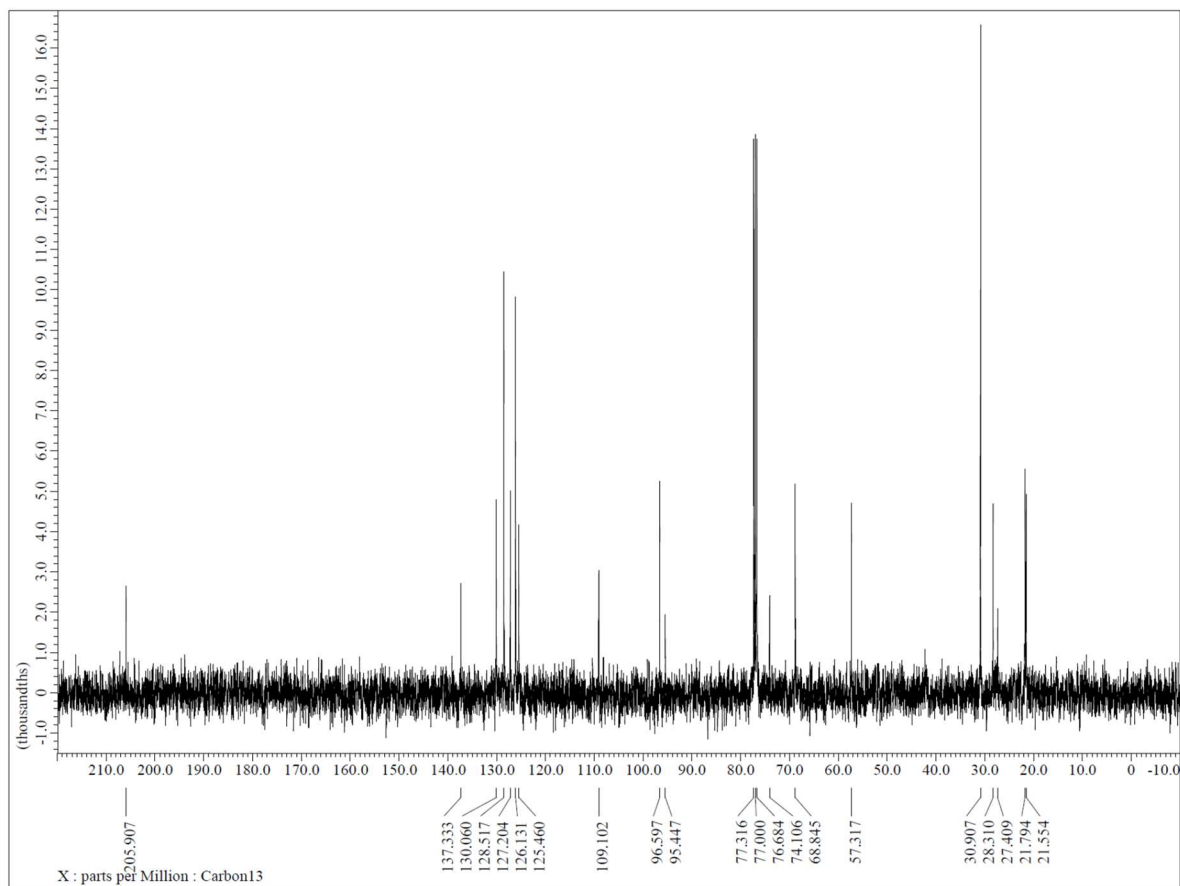



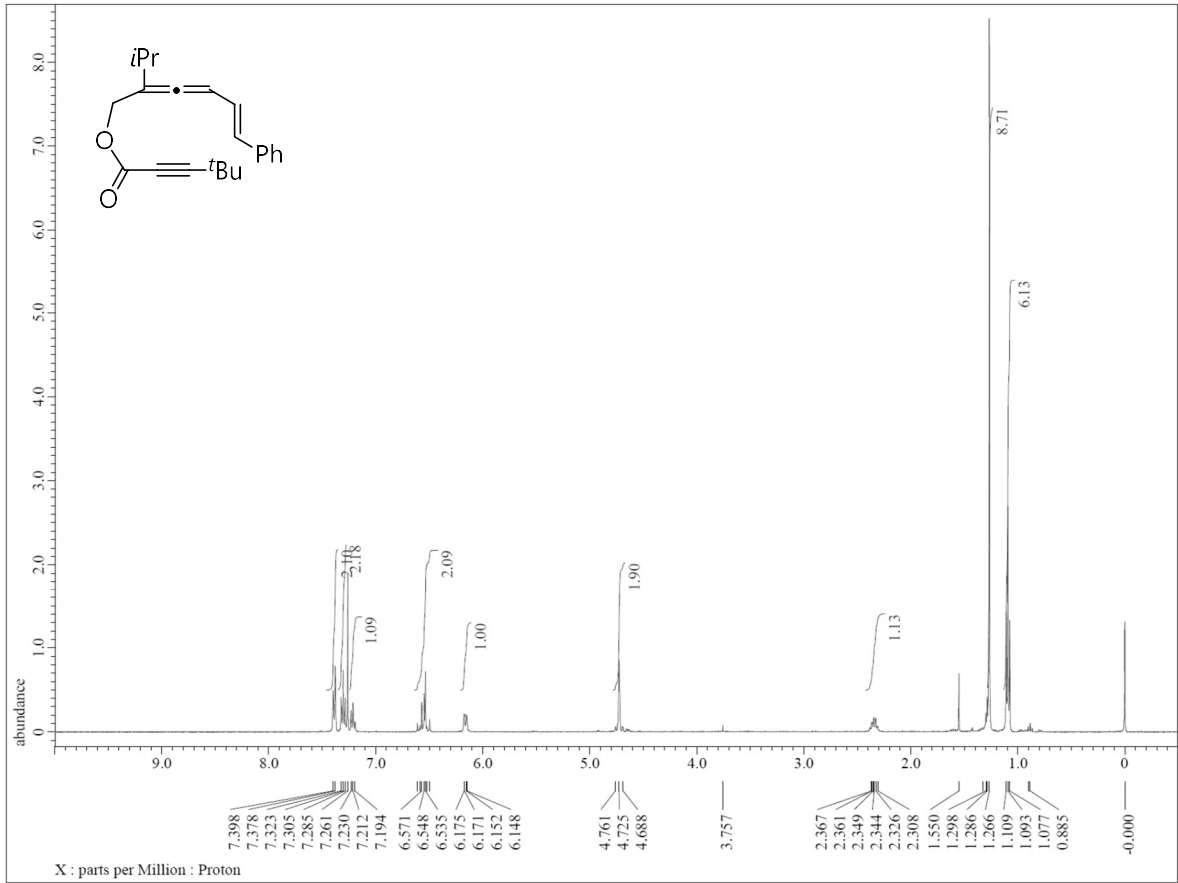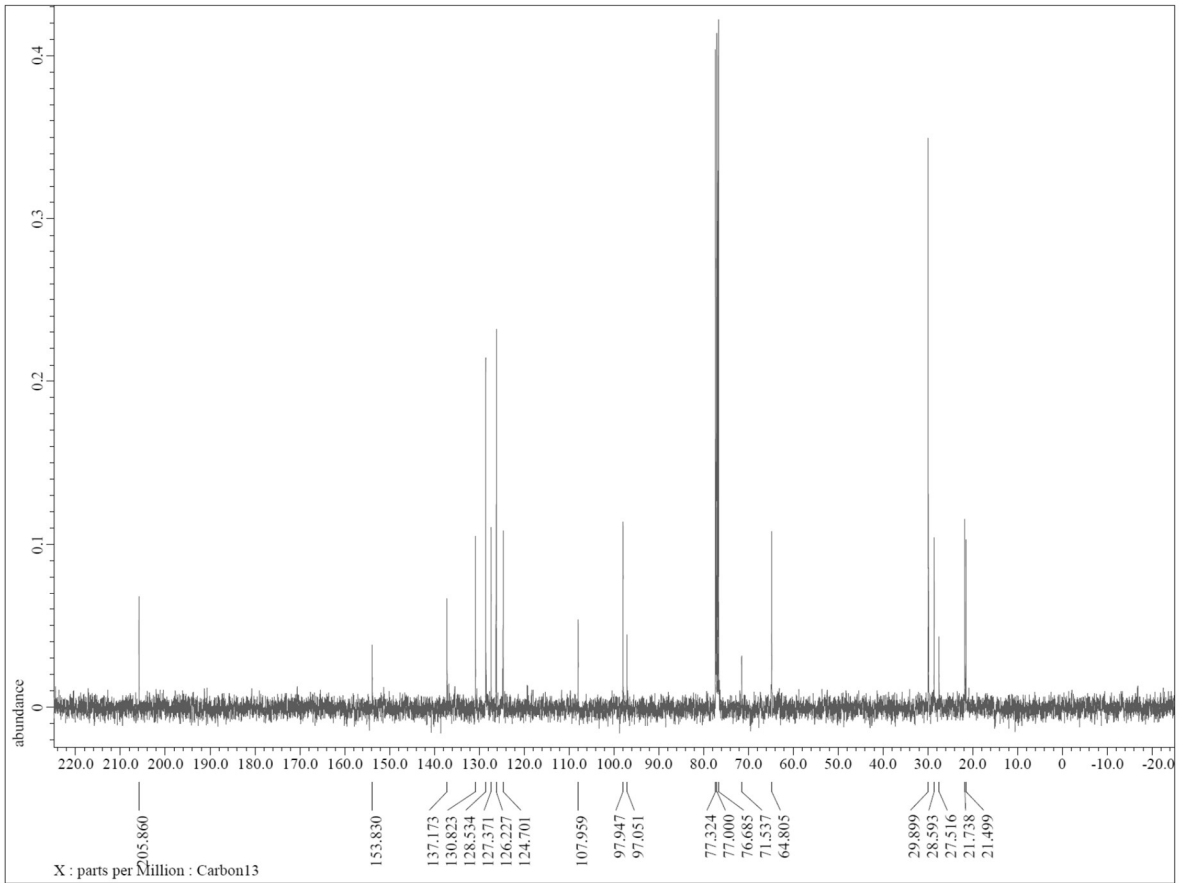

## Computational methods

All calculations were performed with Gaussian 16 program[1]. Structure optimizations were carried out using the M06[2] functional with an ultrafine grid and the LanL2DZ[3] (for nickel) and 6-31+G(d)[4] (for the other atoms) basis sets. Harmonic vibrational frequencies were computed at the same level of theory to confirm no imaginary vibration was observed for the optimized structure, and only one imaginary vibration was observed for the transition state. The intrinsic reaction coordinate (IRC) method was used to track minimum energy paths from transition structures to the corresponding local minima.

## References

- 1 M. J. Frisch, G. W. Trucks, H. B. Schlegel, G. E. Scuseria, M. A. Robb, J. R. Cheeseman, G. Scalmani, V. Barone, G. A. Petersson, H. Nakatsuji, X. Li, M. Caricato, A. V. Marenich, J. Bloino, B. G. Janesko, R. Gomperts, B. Mennucci, H. P. Hratchian, J. V. Ortiz, A. F. Izmaylov, J. L. Sonnenberg, D. Williams-Young, F. Ding, F. Lipparini, F. Egidi, J. Goings, B. Peng, A. Petrone, T. Henderson, D. Ranasinghe, V. G. Zakrzewski, J. Gao, N. Rega, G. Zheng, W. Liang, M. Hada, M. Ehara, K. Toyota, R. Fukuda, J. Hasegawa, M. Ishida, T. Nakajima, Y. Honda, O. Kitao, H. Nakai, T. Vreven, K. Throssell, J. A. Jr. Montgomery, J. E. Peralta, F. Ogliaro, M. J. Bearpark, J. J. Heyd, E. N. Brothers, K. N. Kudin, V. N. Staroverov, T. A. Keith, R. Kobayashi, J. Normand, K. Raghavachari, A. P. Rendell, J. C. Burant, S. S. Iyengar, J. Tomasi, M. Cossi, J. M. Millam, M. Klene, C. Adamo, R. Cammi, J. W. Ochterski, R. L. Martin, K. Morokuma, O. Farkas, J. B. Foresman, D. J. Gaussian 16 Revision C.01 Fox, *Gaussian, Inc., WallingfordCT*, 2016.
- 2 (a) Y. Zhao, D. G. Truhlar, *Acc. Chem. Res.* **2008**, *41*, 157–167. (b) Y. Zhao, D. G. Truhlar, *Theor. Chem. Acc.* **2008**, *120*, 215–241.
- 3 (a) P. J. Hay, W. R. Wadt, *J. Chem. Phys.* **1985**, *82*, 270–283. (b) W. R. Wadt, P. J. Hay, *J. Chem. Phys.* **1985**, *82*, 284–298. (c) P. J. Hay, W. R. Wadt, *J. Chem. Phys.* **1985**, *82*, 299–310.
- 4 (a) W. J. Hehre, R. Ditchfield, J. A. Pople, *J. Chem. Phys.* **1972**, *56*, 2257–2261. (b) P. C. Hariharan, J. A. Pople, *Theor. Chim. Acta* **1973**, *28*, 213–222. (c) M. M. Francl, W. J. Pietro, W. J. Hehre, J. S. Binkley, M. S. Gordon, D. J. DeFrees, J. A. Pople, *J. Chem. Phys.* **1982**, *77*, 3654–3665.

## Cartesian Coordinates and Energies

|                                              |   |           |           |           |
|----------------------------------------------|---|-----------|-----------|-----------|
| NiL2.log                                     | H | -4.736904 | 1.159738  | -0.304591 |
| Energy (E) = -1542.50077227 Hartree          | C | -4.105033 | -1.593740 | 0.320498  |
| Enthalpy (H) = -1542.216573 Hartree          | H | -4.710697 | -1.292741 | -0.545397 |
| Gibbs free energy (G) = -1542.299265 Hartree | H | -4.327052 | -2.636778 | 0.565122  |
| Charge = 0, Spin = 1                         | H | -4.355098 | -0.958877 | 1.183034  |
| Ni 0.093047 -0.278003 -0.660273              | P | 2.075688  | -0.031946 | -0.031173 |
| P -1.967173 -0.104096 -0.286093              | O | 2.330945  | 1.129028  | 1.098212  |
| O -2.342632 0.772785 1.062587                | O | 2.804176  | -1.197286 | 0.858884  |
| O -2.967477 0.667972 -1.311863               | O | 3.205916  | 0.318836  | -1.162129 |
| O -2.722874 -1.523290 0.011941               | C | 1.790699  | 2.408532  | 0.813046  |
| C -1.668332 0.425437 2.262397                | H | 0.722025  | 2.340163  | 0.552966  |
| H -0.580983 0.357629 2.101400                | H | 1.908539  | 3.013765  | 1.716758  |
| H -1.882691 1.212092 2.992083                | H | 2.327449  | 2.889975  | -0.018486 |
| H -2.029457 -0.539125 2.648537               | C | 2.737273  | -2.511782 | 0.331184  |
| C -3.977296 1.603047 -0.961781               | H | 3.354875  | -2.608099 | -0.574818 |
| H -3.545456 2.476038 -0.458978               | H | 3.121971  | -3.185728 | 1.101991  |
| H -4.446040 1.913329 -1.900694               | H | 1.700395  | -2.790743 | 0.088962  |
|                                              | C | 4.561819  | 0.550619  | -0.799811 |

H 4.996952 -0.335234 -0.318405  
H 5.103404 0.769430 -1.724623  
H 4.646492 1.402852 -0.112469

SM1.log

Energy (E) = -1610.54980187 Hartree

Enthalpy (H) = -1610.032369 Hartree

Gibbs free energy (G) = -1610.128949 Hartree

Charge = 0, Spin = 1

C 1.265541 1.055987 -1.661832  
C 0.645580 -1.755977 -0.344902  
C 1.337869 -0.546338 0.273015  
H 1.926016 1.791202 -2.136129  
H 0.944026 0.351366 -2.448569  
H 0.601392 0.079698 0.795146  
H 2.053133 -0.889937 1.034111  
C 0.099786 1.697945 -1.073903  
C -0.894729 2.177603 -0.577164  
C -3.241289 -1.357572 -0.187419  
C -2.824740 -1.302919 -1.466208  
C -1.439911 -1.437523 -1.910350  
C -0.393795 -1.607866 -1.127617  
H -3.547242 -1.117050 -2.263818  
H -1.266609 -1.348281 -2.986865  
H -2.489031 -1.559235 0.583302  
N 2.059082 0.361012 -0.626675  
S 3.568807 -0.164830 -1.149816  
O 3.539176 -1.565296 -1.564239  
O 4.049642 0.856236 -2.072416  
C 1.187205 -3.111438 0.022525  
H 1.208499 -3.235775 1.115746  
H 0.580878 -3.917569 -0.403976  
H 2.216539 -3.213265 -0.348039  
C -2.113983 2.707289 0.047453  
C -4.599357 -1.156383 0.306241  
C -5.683218 -0.833304 -0.526479  
C -4.841879 -1.267251 1.683599  
C -6.952622 -0.637284 -0.001088  
H -5.531226 -0.730159 -1.600735  
C -6.112896 -1.070845 2.212028  
H -4.010067 -1.511748 2.346406  
C -7.176334 -0.755222 1.371187  
H -7.777420 -0.387822 -0.667382  
H -6.272759 -1.164501 3.285322  
H -8.173606 -0.600307 1.779737

C -1.939555 4.196818 0.357278  
H -2.850528 4.590059 0.831133  
H -1.096022 4.362237 1.040706  
H -1.753114 4.771518 -0.559629  
C -3.296891 2.507960 -0.906366  
H -3.146903 3.063824 -1.841670  
H -3.422789 1.444576 -1.151144  
H -4.223565 2.865091 -0.433844  
C -2.366733 1.931723 1.346213  
H -2.472662 0.856841 1.142017  
H -1.539689 2.071641 2.056334  
H -3.295566 2.281408 1.820289  
C 4.512684 -0.076796 0.360043  
C 4.978104 -1.248302 0.946572  
C 4.789092 1.175737 0.902725  
C 5.737344 -1.160624 2.111285  
H 4.752511 -2.208178 0.484703  
C 5.547005 1.250710 2.064535  
H 4.414422 2.073517 0.413661  
C 6.018815 0.084086 2.667147  
H 6.111404 -2.068024 2.581824  
H 5.774429 2.221676 2.500643  
H 6.613968 0.148608 3.576623

TS1DA.log

Energy (E) = -1610.51457648 Hartree

Enthalpy (H) = -1609.993570 Hartree

Gibbs free energy (G) = -1610.086505 Hartree

Charge = 0, Spin = 1

Imaginary frequency: -440.0814

C 1.025033 0.771395 -1.333837  
C 0.605201 -1.694082 0.153948  
C 1.545468 -0.634576 0.667207  
H 1.236388 1.827492 -1.545968  
H 1.086318 0.221255 -2.286363  
H 1.046810 -0.017328 1.430384  
H 2.411087 -1.094916 1.162474  
C -0.344630 0.631108 -0.777095  
C -1.365773 1.255141 -0.444878  
C -3.168394 -1.078635 -0.027115  
C -2.732891 -1.598050 -1.215111  
C -1.367339 -1.828558 -1.505819  
C -0.374420 -1.383911 -0.681258  
H -3.459326 -1.840813 -1.993445  
H -1.097264 -2.206042 -2.495066

H -2.438673 -0.963953 0.778282  
N 2.042904 0.280128 -0.369457  
S 3.464846 -0.220119 -1.118774  
O 3.448727 -1.653136 -1.406022  
O 3.693483 0.737667 -2.193774  
C 0.835499 -3.096137 0.637320  
H 0.863957 -3.135452 1.737159  
H 0.051921 -3.776900 0.287788  
H 1.807905 -3.460005 0.271781  
C -2.275578 2.371280 -0.128651  
C -4.560296 -0.856377 0.341340  
C -5.601469 -0.780463 -0.599467  
C -4.894817 -0.721302 1.698474  
C -6.916441 -0.591472 -0.196284  
H -5.373304 -0.850252 -1.663262  
C -6.210309 -0.530533 2.103649  
H -4.100163 -0.779377 2.444413  
C -7.230017 -0.465578 1.157169  
H -7.705136 -0.532666 -0.945303  
H -6.440933 -0.433564 3.163727  
H -8.261773 -0.312907 1.469487  
C -1.474362 3.666009 -0.358591  
H -2.103318 4.541689 -0.138600  
H -0.589936 3.702751 0.292129  
H -1.137335 3.740685 -1.401747  
C -3.495618 2.369827 -1.051787  
H -3.188592 2.392311 -2.106383  
H -4.116176 1.479725 -0.892897  
H -4.113002 3.258129 -0.854211  
C -2.717355 2.313791 1.335438  
H -3.328857 1.424847 1.533992  
H -1.849167 2.300038 2.008882  
H -3.323572 3.199517 1.573761  
C 4.663251 0.050534 0.173103  
C 5.308086 -1.039178 0.747244  
C 4.950093 1.358315 0.556681  
C 6.261166 -0.810787 1.737173  
H 5.065472 -2.045572 0.409738  
C 5.902456 1.574038 1.544941  
H 4.432502 2.188920 0.079424  
C 6.555117 0.490665 2.134007  
H 6.776375 -1.652772 2.195870  
H 6.140475 2.589876 1.855097  
H 7.301808 0.665272 2.907003

PDA.log

Energy (E) = -1610.64909229 Hartree  
Enthalpy (H) = -1610.127794 Hartree  
Gibbs free energy (G) = -1610.214998  
Hartree

Charge = 0, Spin = 1

C 0.313768 0.289858 -0.964953  
C 0.609282 -2.343485 -0.128227  
C 1.748979 -1.640790 -0.799576  
H 0.353165 1.374356 -1.007968  
H 0.039536 -0.069283 -1.979186  
H 2.696892 -1.993104 -0.358187  
H 1.790482 -1.901149 -1.877324  
C -0.690713 -0.248244 0.018351  
C -1.720298 0.472623 0.530427  
C -2.852578 -0.247487 1.239156  
C -2.562039 -1.673909 1.587735  
C -1.502697 -2.339916 1.121716  
C -0.498315 -1.684819 0.300480  
H -3.305178 -2.175851 2.209944  
H -1.362478 -3.383927 1.396045  
H -3.093296 0.280557 2.176318  
N 1.650940 -0.199175 -0.614764  
S 2.933707 0.676681 -1.265050  
O 3.369435 0.110593 -2.539818  
O 2.547912 2.080663 -1.180092  
C 0.863085 -3.807889 0.055485  
H 1.491668 -4.001212 0.939516  
H -0.051419 -4.400660 0.157348  
H 1.413336 -4.207229 -0.809440  
C -1.833905 2.010559 0.414397  
C -4.138816 -0.266786 0.409856  
C -4.108366 -0.580341 -0.950145  
C -5.375601 -0.059759 1.022855  
C -5.287313 -0.662921 -1.684908  
H -3.147818 -0.760194 -1.436462  
C -6.558261 -0.147779 0.293085  
H -5.409059 0.185348 2.086883  
C -6.516784 -0.445792 -1.066392  
H -5.245839 -0.901252 -2.747004  
H -7.513894 0.022207 0.787462  
H -7.438898 -0.510067 -1.641997  
C -0.576329 2.674375 1.009616  
H -0.681470 3.768400 0.969356  
H -0.468833 2.387538 2.065777  
H 0.363959 2.423976 0.507228  
C -2.077059 2.462620 -1.035288

H -1.305414 2.134106 -1.739777  
H -3.041034 2.080503 -1.399495  
H -2.114474 3.561031 -1.081118  
C -3.001300 2.588056 1.231296  
H -3.980092 2.225658 0.895540  
H -2.900952 2.386389 2.307201  
H -3.003550 3.680142 1.112091  
C 4.206119 0.350506 -0.062545  
C 5.331046 -0.374399 -0.437582  
C 4.052243 0.856248 1.226182  
C 6.328645 -0.600964 0.508181  
H 5.415854 -0.744566 -1.457810  
C 5.053311 0.623166 2.160526  
H 3.157631 1.421665 1.484226  
C 6.188512 -0.104301 1.800891  
H 7.217450 -1.165062 0.231397  
H 4.950588 1.011271 3.172205  
H 6.970781 -0.282890 2.536930

INT1S.log

Energy (E) = -3153.09807211 Hartree

Enthalpy (H) = -3152.294007 Hartree

Gibbs free energy (G) = -3152.435510

Hartree

Charge = 0, Spin = 1

C 2.155753 1.051035 -0.037008  
C 2.293096 -1.812170 2.260831  
C 2.862626 -0.523924 1.729357  
H 2.779231 1.825955 0.454309  
H 2.265890 1.175052 -1.118902  
H 2.379475 0.315653 2.254401  
H 3.933565 -0.463400 2.008386  
C 0.739073 1.233974 0.360579  
C -0.099522 1.768181 1.163731  
C -1.397620 -2.621329 1.248267  
C -0.561384 -3.537374 0.723775  
C 0.893563 -3.501046 0.826256  
C 1.584219 -2.633038 1.532509  
H -0.967011 -4.400338 0.189092  
H 1.452096 -4.270109 0.284091  
H -0.957670 -1.742651 1.734192  
N 2.674166 -0.282918 0.300794  
S 3.852911 -0.898576 -0.714297  
O 4.094756 -2.275385 -0.310492  
O 3.459822 -0.567883 -2.079321  
C 2.617197 -2.072891 3.706839

H 2.263516 -1.244517 4.341265  
H 2.152377 -2.998159 4.062290  
H 3.705066 -2.152531 3.855739  
C -0.345234 2.516100 2.434413  
C -2.855077 -2.656279 1.210165  
C -3.590024 -3.772768 0.776168  
C -3.566892 -1.512164 1.597418  
C -4.975610 -3.727202 0.697447  
H -3.070666 -4.690433 0.498394  
C -4.954068 -1.464183 1.516872  
H -3.016821 -0.635048 1.941926  
C -5.666835 -2.569485 1.061129  
H -5.524530 -4.604144 0.355092  
H -5.475617 -0.551266 1.802377  
H -6.753441 -2.535715 0.994449  
Ni -1.025152 0.922270 -0.287581  
P -3.069451 1.576476 -0.200510  
O -3.230114 3.127285 -0.743497  
O -4.316607 0.882342 -1.018560  
O -3.801622 1.685864 1.243796  
C -2.175068 3.723575 -1.480923  
H -1.194860 3.477294 -1.044926  
H -2.192430 3.389891 -2.529607  
H -2.329590 4.806926 -1.444561  
C -4.352706 1.024877 -2.430645  
H -3.379221 0.794884 -2.891623  
H -5.089510 0.307060 -2.805236  
H -4.660641 2.042435 -2.706651  
C -5.052505 2.348951 1.399519  
H -5.801406 1.937208 0.711636  
H -5.367363 2.182595 2.434394  
H -4.938212 3.425385 1.218147  
P -0.708683 -0.271930 -2.058456  
O -1.865209 -1.136879 -2.830067  
O -0.288695 0.500937 -3.443238  
O 0.474603 -1.346696 -1.809279  
C -2.700072 -1.987252 -2.053975  
H -3.283526 -1.414714 -1.317213  
H -3.384394 -2.477778 -2.753551  
H -2.109126 -2.750450 -1.526981  
C 0.817037 1.385265 -3.397783  
H 1.756257 0.832375 -3.244646  
H 0.852932 1.898470 -4.363632  
H 0.696379 2.133854 -2.597281  
C 0.878138 -2.284309 -2.801323  
H 1.060609 -1.788829 -3.763944

H 1.809620 -2.733143 -2.443895  
H 0.110702 -3.059908 -2.930290  
C 5.341102 0.025341 -0.353128  
C 6.265470 -0.491206 0.552758  
C 5.537447 1.264351 -0.961407  
C 7.400398 0.254418 0.860728  
H 6.101663 -1.477934 0.983485  
C 6.674793 2.000653 -0.645655  
H 4.819418 1.629967 -1.693945  
C 7.601771 1.498317 0.266554  
H 8.133677 -0.142528 1.560832  
H 6.843613 2.965353 -1.121364  
H 8.492539 2.076467 0.507546  
C -1.158165 3.785517 2.169818  
H -0.624150 4.458519 1.482706  
H -2.138183 3.552566 1.733916  
H -1.324706 4.327856 3.112606  
C 0.998891 2.912055 3.053366  
H 1.595228 2.024377 3.311449  
H 1.587502 3.531550 2.361012  
H 0.844205 3.488319 3.978122  
C -1.105080 1.607932 3.405284  
H -0.546442 0.676754 3.587737  
H -1.247743 2.117504 4.370499  
H -2.091528 1.345024 3.001742

TS1S.log

Energy (E) = -3153.08081556 Hartree

Enthalpy (H) = -3152.251255 Hartree

Gibbs free energy (G) = -3152.388505

Hartree

Charge = 0, Spin = 1

Imaginary frequency: -428.7868

C 1.950593 -0.043934 1.089211  
C 2.250684 -2.208341 -1.020378  
C 3.213831 -1.914299 0.096139  
H 2.016304 -0.263312 2.169583  
H 1.936107 1.042275 0.980381  
H 3.016635 -2.494040 1.013265  
H 4.234900 -2.188746 -0.215477  
C 0.658158 -0.652604 0.572435  
C -0.285757 -1.337178 1.182501  
C -1.905500 -1.379355 -1.774616  
C -0.901268 -0.758062 -2.465810  
C 0.489621 -0.904308 -2.261948  
C 1.171227 -1.450790 -1.208260

H -1.176643 -0.087655 -3.284307  
H 1.136976 -0.364124 -2.961601  
H -1.632794 -2.137806 -1.041564  
N 3.200986 -0.505056 0.484383  
S 4.012168 0.543753 -0.548859  
O 3.816117 0.241547 -1.964761  
O 3.738726 1.892761 -0.055861  
C 2.671507 -3.274870 -1.986639  
H 2.899420 -4.224072 -1.473605  
H 1.894873 -3.467214 -2.734834  
H 3.591081 -2.966119 -2.514000  
C -0.582742 -2.573923 1.974543  
C -3.330071 -1.271471 -2.071324  
C -3.856297 -0.403930 -3.046482  
C -4.236408 -2.103841 -1.393218  
C -5.219457 -0.350755 -3.303975  
H -3.188388 0.231318 -3.627776  
C -5.600516 -2.055444 -1.652316  
H -3.853011 -2.795625 -0.643307  
C -6.104182 -1.170249 -2.602870  
H -5.596103 0.332147 -4.065086  
H -6.275833 -2.716367 -1.108448  
H -7.173319 -1.127070 -2.805859  
Ni -1.092172 0.234154 0.546478  
P -3.109701 0.334112 1.301641  
O -3.258725 0.923571 2.837658  
O -4.290616 1.210371 0.567133  
O -3.923976 -1.057911 1.441546  
C -2.154026 1.546887 3.467119  
H -1.206421 1.069721 3.169150  
H -2.110796 2.615704 3.209124  
H -2.289623 1.439369 4.548561  
C -4.294741 2.620866 0.724713  
H -3.303881 3.060257 0.530961  
H -5.003152 3.019824 -0.008495  
H -4.623606 2.894215 1.736099  
C -5.289059 -1.105130 1.843361  
H -5.928651 -0.646537 1.080221  
H -5.541893 -2.165363 1.950625  
H -5.429919 -0.594854 2.804815  
P -0.558795 2.191870 -0.225489  
O -1.553594 3.156242 -1.104842  
O -0.259052 3.400138 0.848002  
O 0.793571 2.127649 -1.119472  
C -2.321539 2.545037 -2.127003  
H -2.857753 1.659119 -1.753626

H -3.048958 3.288859 -2.468376  
H -1.683070 2.252849 -2.975640  
C 0.744213 3.213315 1.829459  
H 1.746327 3.173434 1.376214  
H 0.689858 4.072828 2.504938  
H 0.574700 2.291863 2.409337  
C 1.361394 3.283096 -1.731559  
H 1.477564 4.098336 -1.005634  
H 2.345153 2.982932 -2.102101  
H 0.728218 3.626220 -2.560127  
C 5.707141 0.129470 -0.168891  
C 6.497493 -0.477398 -1.138505  
C 6.211553 0.453223 1.088513  
C 7.825627 -0.773126 -0.836205  
H 6.069651 -0.703378 -2.114097  
C 7.537877 0.157147 1.378359  
H 5.567345 0.935002 1.822764  
C 8.342480 -0.456617 0.417054  
H 8.456946 -1.248872 -1.584796  
H 7.948095 0.407503 2.355290  
H 9.381444 -0.686761 0.648605  
C -1.151372 -2.162710 3.338144  
H -0.443841 -1.517702 3.880898  
H -2.100857 -1.623062 3.228578  
H -1.334645 -3.058068 3.951752  
C 0.706330 -3.371667 2.195371  
H 1.134149 -3.695672 1.235843  
H 1.457827 -2.774310 2.732458  
H 0.501515 -4.269920 2.797189  
C -1.597532 -3.470490 1.259658  
H -1.212149 -3.808783 0.286279  
H -1.792961 -4.365575 1.869744  
H -2.545363 -2.939687 1.108773

INT2S.log

Energy (E) = -3153.08040972 Hartree

Enthalpy (H) = -3152.276467 Hartree

Gibbs free energy (G) = -3152.411669

Hartree

Charge = 0, Spin = 1

C 1.782953 -0.935568 0.355591  
C 2.276256 -0.368303 -2.451959  
C 3.277296 -1.068993 -1.582383  
H 1.756008 -1.958580 0.771136  
H 1.630777 -0.252448 1.198317  
H 3.191834 -2.169255 -1.636951

H 4.302603 -0.834207 -1.906524  
C 0.646190 -0.777636 -0.669294  
C -0.394985 -1.691870 -0.524295  
C -2.121373 -0.014222 -1.898431  
C -1.213740 0.921096 -2.523407  
C 0.131572 0.790970 -2.665653  
C 1.023596 -0.130015 -1.984689  
H -1.661516 1.828545 -2.947645  
H 0.635701 1.563956 -3.249990  
H -2.003132 -1.027017 -2.285386  
N 3.128770 -0.707170 -0.168960  
S 3.959874 0.668163 0.303453  
O 3.977538 1.705584 -0.725435  
O 3.497053 0.988322 1.653116  
C 2.787796 0.071595 -3.786595  
H 3.416198 -0.710053 -4.241654  
H 1.985545 0.298851 -4.496900  
H 3.424800 0.967345 -3.684262  
C -0.572710 -3.168195 -0.756598  
C -3.543664 0.331622 -1.747771  
C -3.994272 1.647561 -1.545227  
C -4.521658 -0.674805 -1.847943  
C -5.350792 1.942172 -1.465302  
H -3.265212 2.448141 -1.422635  
C -5.876357 -0.384259 -1.753220  
H -4.201048 -1.705432 -2.008193  
C -6.303993 0.929820 -1.563461  
H -5.666363 2.974658 -1.311630  
H -6.606780 -1.189155 -1.839648  
H -7.366038 1.161758 -1.494859  
Ni -1.200793 -0.198692 0.037783  
P -2.871676 -0.729637 1.370772  
O -2.539909 -0.871754 2.989380  
O -4.197948 0.188871 1.546886  
O -3.599605 -2.145322 1.035480  
C -1.539708 -1.780798 3.400150  
H -0.667895 -1.760312 2.724141  
H -1.223400 -1.491303 4.408453  
H -1.934509 -2.808130 3.428508  
C -4.099223 1.553333 1.932613  
H -3.537729 2.136944 1.190528  
H -5.123746 1.934268 1.978763  
H -3.621055 1.648296 2.916497  
C -4.790103 -2.545150 1.709790  
H -5.645253 -1.965175 1.343754  
H -4.934809 -3.606557 1.485646

H -4.694529 -2.405145 2.794855  
 P -0.685405 1.885190 0.656921  
 O -1.466015 3.214759 0.101381  
 O -0.888045 2.298393 2.237581  
 O 0.882481 2.207427 0.397197  
 C -1.004451 3.993556 -0.989678  
 H -1.833869 4.132863 -1.694640  
 H -0.684985 4.976309 -0.618309  
 H -0.168208 3.514302 -1.515309  
 C -0.210434 1.501098 3.194957  
 H 0.815453 1.867561 3.343869  
 H -0.769508 1.566433 4.134574  
 H -0.166767 0.446070 2.885324  
 C 1.522884 3.392450 0.877373  
 H 0.837555 4.001230 1.481829  
 H 2.383687 3.081631 1.479103  
 H 1.876601 3.968369 0.014421  
 C 5.625047 0.032708 0.418184  
 C 6.596969 0.488971 -0.464714  
 C 5.921755 -0.889741 1.419262  
 C 7.897287 0.000906 -0.345840  
 H 6.329402 1.220780 -1.225225  
 C 7.221679 -1.366969 1.531338  
 H 5.138766 -1.220742 2.100174  
 C 8.207242 -0.922910 0.648253  
 H 8.669094 0.347994 -1.030800  
 H 7.469922 -2.085399 2.310819  
 H 9.224837 -1.299934 0.739600  
 C -0.624316 -3.908177 0.589618  
 H 0.272611 -3.719218 1.196339  
 H -1.509750 -3.607202 1.162859  
 H -0.683573 -4.992138 0.406265  
 C 0.602283 -3.705418 -1.582192  
 H 0.698628 -3.159666 -2.531600  
 H 1.551780 -3.613519 -1.035564  
 H 0.451014 -4.770808 -1.811103  
 C -1.875914 -3.471890 -1.504678  
 H -1.860240 -3.062936 -2.524646  
 H -1.995289 -4.562451 -1.588819  
 H -2.741625 -3.067766 -0.966817

INT2S'.log

Energy (E) = -3153.11664303 Hartree

Enthalpy (H) = -3152.311559 Hartree

Gibbs free energy (G) = -3152.447079

Hartree

Charge = 0, Spin = 1

C 2.599269 1.348797 0.975467  
 C 1.823414 -0.417489 2.980849  
 C 3.285157 -0.234890 2.712115  
 H 2.662838 2.147571 1.735501  
 H 2.944550 1.778746 0.032363  
 H 3.731499 0.428901 3.478435  
 H 3.812872 -1.195380 2.803959  
 C 1.202315 0.778734 0.898844  
 C 0.337852 0.921883 -0.127574  
 C -1.881302 1.464119 1.285336  
 C -1.697226 0.308616 2.139905  
 C -0.527389 -0.345256 2.434665  
 C 0.858046 0.004004 2.120430  
 H -2.598712 -0.173348 2.527216  
 H -0.646625 -1.241115 3.047281  
 H -1.058275 2.177524 1.282006  
 N 3.574966 0.331778 1.401915  
 S 4.269155 -0.622288 0.228932  
 O 4.921112 -1.731759 0.921512  
 O 3.361435 -0.903434 -0.880783  
 C 1.551367 -1.132265 4.272534  
 H 2.431873 -1.098228 4.930659  
 H 0.709089 -0.705053 4.830921  
 H 1.328012 -2.200908 4.105828  
 C 0.498719 1.879399 -1.319487  
 C -3.189789 2.146671 1.205552  
 C -4.377269 1.649307 1.764948  
 C -3.261572 3.384845 0.547644  
 C -5.575468 2.348019 1.654396  
 H -4.380672 0.695305 2.290481  
 C -4.457123 4.081645 0.427239  
 H -2.352003 3.801701 0.111931  
 C -5.629035 3.565718 0.979589  
 H -6.477487 1.936602 2.109041  
 H -4.473079 5.038552 -0.094302  
 H -6.567848 4.112269 0.897168  
 Ni -1.379262 -0.059643 -0.002585  
 P -3.397516 -0.599932 -0.707600  
 O -3.607287 -1.644987 -1.959456  
 O -4.364109 -1.365273 0.357870  
 O -4.237785 0.689011 -1.224902  
 C -3.075143 -1.306253 -3.230468  
 H -1.978031 -1.283271 -3.202187  
 H -3.392526 -2.089744 -3.924804  
 H -3.456058 -0.333362 -3.574178



C -5.268045 -2.421690 0.055364  
H -4.737807 -3.271304 -0.390915  
H -5.717251 -2.720520 1.007725  
H -6.059432 -2.096671 -0.632219  
C -5.622311 0.636594 -1.526810  
H -6.203426 0.455975 -0.611400  
H -5.896256 1.616487 -1.929026  
H -5.840631 -0.142580 -2.272199  
P -0.485326 -1.998189 -0.480892  
O -1.407138 -3.297699 -0.093940  
O -0.232421 -2.541677 -2.000391  
O 0.905179 -2.286643 0.279838  
C -1.812560 -3.466457 1.253847  
H -2.417309 -2.615674 1.599947  
H -2.417216 -4.378431 1.284938  
H -0.943789 -3.588088 1.919111  
C 0.717854 -1.874605 -2.821125  
H 1.659500 -1.689892 -2.285526  
H 0.904882 -2.531766 -3.676074  
H 0.319762 -0.915530 -3.185341  
C 1.626228 -3.506529 0.149460  
H 2.210832 -3.507112 -0.778366  
H 2.316710 -3.549696 0.998833  
H 0.951922 -4.373405 0.163047  
C 5.530610 0.465177 -0.416120  
C 6.570232 0.855209 0.425730  
C 5.475098 0.877609 -1.742366  
C 7.569096 1.681436 -0.073539  
H 6.589854 0.509499 1.458714  
C 6.480046 1.710101 -2.232725  
H 4.654059 0.543396 -2.374389  
C 7.521968 2.110030 -1.401279  
H 8.388502 1.992232 0.572447  
H 6.447077 2.043617 -3.268628  
H 8.305942 2.759398 -1.788243  
C -0.740127 1.826257 -2.224797  
H -0.841358 0.842597 -2.707775  
H -1.664676 2.014446 -1.661569  
H -0.660713 2.581583 -3.023081  
C 1.719810 1.583654 -2.213704  
H 2.651369 2.004353 -1.813693  
H 1.884735 0.508532 -2.344136  
H 1.572037 2.040081 -3.204913  
C 0.614095 3.326451 -0.812590  
H 1.488888 3.472692 -0.165468  
H 0.706627 4.020148 -1.663441

H -0.274316 3.621514 -0.238222

TS2.log

Energy (E) = -3153.11962804 Hartree

Enthalpy (H) = -3152.288451 Hartree

Gibbs free energy (G) = -3152.423409

Hartree

Charge = 0, Spin = 1

Imaginary frequency: -291.1606

C 2.404610 1.413382 0.622104

C 1.751885 -0.196074 2.842630

C 3.190196 -0.003764 2.468655

H 2.594621 2.318866 1.229490

H 2.648757 1.674169 -0.410183

H 3.672022 0.748578 3.124817

H 3.738532 -0.944378 2.622041

C 0.973354 0.965670 0.795306

C -0.066076 1.253053 -0.034158

C -1.644539 1.741747 1.251208

C -1.769149 0.543457 2.079876

C -0.642631 -0.202859 2.356707

C 0.734347 0.209038 2.041930

H -2.733405 0.252293 2.497943

H -0.760935 -1.080803 2.990299

H -0.878535 2.434680 1.607259

N 3.354557 0.402290 1.084170

S 4.120198 -0.563401 -0.017564

O 4.625476 -1.729273 0.701261

O 3.291298 -0.724366 -1.208785

C 1.571985 -0.965554 4.115055

H 2.420155 -0.797324 4.795569

H 0.659219 -0.696925 4.658908

H 1.541224 -2.052634 3.918468

C -0.001856 2.053075 -1.335430

C -2.877066 2.535236 0.984309

C -4.174349 2.012655 1.061491

C -2.752190 3.916748 0.775292

C -5.289449 2.828708 0.906852

H -4.329632 0.951885 1.252707

C -3.861828 4.736368 0.604857

H -1.753693 4.356555 0.747957

C -5.142840 4.192685 0.664584

H -6.285619 2.391701 0.980165

H -3.724939 5.804043 0.436861

H -6.018703 4.827687 0.537881

Ni -1.454302 -0.246760 0.223792

P -3.374571 -0.843261 -0.617949  
O -3.446523 -2.067705 -1.720765  
O -4.403041 -1.509861 0.475118  
O -4.282906 0.294910 -1.369829  
C -2.845850 -1.847412 -2.985420  
H -1.959125 -1.200168 -2.905166  
H -2.532153 -2.820008 -3.376519  
H -3.563643 -1.376581 -3.672534  
C -5.175889 -2.687176 0.283401  
H -4.533191 -3.541484 0.038270  
H -5.694017 -2.871804 1.230149  
H -5.916985 -2.565456 -0.517548  
C -5.643423 0.090329 -1.697103  
H -6.245478 -0.034858 -0.784740  
H -5.984776 0.984677 -2.228192  
H -5.775592 -0.790084 -2.343860  
P -0.373868 -2.123962 -0.237790  
O -1.180032 -3.438099 0.341495  
O -0.180215 -2.856244 -1.696549  
O 1.102373 -2.267402 0.436621  
C -1.620370 -3.442587 1.683914  
H -2.315356 -2.612329 1.883772  
H -2.138804 -4.394358 1.841227  
H -0.771089 -3.381695 2.383995  
C 0.727591 -2.314037 -2.642295  
H 1.516115 -1.712409 -2.170066  
H 1.190586 -3.157844 -3.167119  
H 0.189694 -1.697081 -3.377816  
C 1.835797 -3.487590 0.392485  
H 2.352342 -3.587591 -0.571080  
H 2.588152 -3.431159 1.186130  
H 1.177227 -4.352360 0.548755  
C 5.522150 0.424631 -0.513973  
C 6.606664 0.529193 0.354639  
C 5.502307 1.087256 -1.736492  
C 7.689918 1.319041 -0.011403  
H 6.598793 -0.013251 1.299750  
C 6.592893 1.878818 -2.092241  
H 4.647673 0.968120 -2.400770  
C 7.681554 1.994682 -1.232545  
H 8.546911 1.404795 0.654643  
H 6.591667 2.401089 -3.047554  
H 8.533160 2.611458 -1.515742  
C -1.380386 2.221331 -1.982102  
H -1.867796 1.249210 -2.129577  
H -2.062476 2.837731 -1.387256

H -1.266621 2.702459 -2.965326  
C 0.846197 1.304805 -2.375821  
H 1.858364 1.051115 -2.042673  
H 0.354745 0.360326 -2.644269  
H 0.925277 1.912652 -3.290415  
C 0.578768 3.457986 -1.106175  
H 1.635502 3.444228 -0.811561  
H 0.503718 4.051511 -2.030076  
H 0.024707 3.996058 -0.324632

INT3.log

Energy (E) = -3153.16190781 Hartree

Enthalpy (H) = -3152.354793 Hartree

Gibbs free energy (G) = -3152.489921

Hartree

Charge = 0, Spin = 1

C 2.178093 1.011828 -0.066653  
C 1.812744 -0.454709 2.302779  
C 3.120227 -0.493784 1.571494  
H 2.753298 1.830893 0.418029  
H 2.168636 1.210492 -1.136562  
H 3.856190 0.233726 1.981427  
H 3.555444 -1.498572 1.680083  
C 0.800867 0.980449 0.551683  
C -0.234339 1.789070 0.168647  
C -1.288138 1.973945 1.295735  
C -1.701454 0.614230 1.829361  
C -0.641232 -0.221085 2.197163  
C 0.714599 0.125253 1.755293  
H -2.652199 0.555899 2.364805  
H -0.761925 -0.983251 2.968913  
H -0.684030 2.422043 2.111604  
N 2.883552 -0.248776 0.152423  
S 4.131160 -0.593255 -0.900333  
O 4.642862 -1.902049 -0.513317  
O 3.612793 -0.349998 -2.241850  
C 1.803901 -1.250113 3.568021  
H 2.761887 -1.137087 4.098598  
H 1.009353 -0.942108 4.257122  
H 1.674471 -2.324964 3.357606  
C -0.242429 2.530166 -1.192759  
C -2.438266 2.947334 1.174605  
C -3.738848 2.566674 0.838675  
C -2.212335 4.288550 1.503637  
C -4.762145 3.508830 0.767035  
H -3.958140 1.523106 0.620781

C -3.228298 5.235989 1.432250  
H -1.208338 4.594837 1.807379  
C -4.511035 4.849611 1.049022  
H -5.768709 3.188986 0.495859  
H -3.020714 6.275688 1.683584  
H -5.313639 5.583985 0.992405  
Ni -1.496223 -0.942442 0.530188  
P -3.240048 -0.870393 -0.682495  
O -3.729912 -2.078305 -1.694038  
O -4.596952 -0.836533 0.228930  
O -3.370256 0.433487 -1.665772  
C -2.856346 -2.441426 -2.755865  
H -1.905950 -2.837927 -2.373138  
H -3.363642 -3.222618 -3.329662  
H -2.658384 -1.581260 -3.414110  
C -5.824003 -1.485779 -0.076478  
H -5.688508 -2.572649 -0.128713  
H -6.511882 -1.237816 0.737937  
H -6.246376 -1.139471 -1.028908  
C -4.560893 0.770699 -2.356055  
H -5.352255 1.051775 -1.645860  
H -4.330317 1.635723 -2.987538  
H -4.908456 -0.060656 -2.986201  
P -0.495061 -2.823299 0.205003  
O -1.445775 -4.151206 0.364287  
O 0.081793 -3.294907 -1.252113  
O 0.760567 -3.157789 1.198625  
C -2.356740 -4.136692 1.450624  
H -3.046410 -3.280239 1.381870  
H -2.928441 -5.068028 1.399684  
H -1.828344 -4.090601 2.415588  
C 0.982879 -2.396086 -1.891503  
H 1.935351 -2.341790 -1.349108  
H 1.161358 -2.781172 -2.899240  
H 0.555242 -1.382603 -1.956087  
C 1.547864 -4.332553 1.027281  
H 2.265229 -4.197201 0.207481  
H 2.097758 -4.486072 1.962384  
H 0.918568 -5.208289 0.822644  
C 5.405275 0.613327 -0.582194  
C 6.375108 0.341592 0.380980  
C 5.375888 1.829090 -1.263491  
C 7.331779 1.311327 0.666788  
H 6.386654 -0.627528 0.877662  
C 6.337156 2.790819 -0.967709  
H 4.622152 2.002945 -2.030261

C 7.310513 2.532772 -0.003985  
H 8.100769 1.108992 1.410386  
H 6.330958 3.741527 -1.498113  
H 8.062824 3.287183 0.221055  
C -1.557316 3.238917 -1.557615  
H -2.417241 2.564043 -1.487111  
H -1.757473 4.131499 -0.955928  
H -1.477470 3.569181 -2.604138  
C -0.056971 1.513544 -2.340705  
H 0.825792 0.870540 -2.266840  
H -0.940124 0.858408 -2.389165  
H 0.015592 2.050519 -3.298541  
C 0.838814 3.624992 -1.229366  
H 1.865060 3.248601 -1.146369  
H 0.770969 4.183141 -2.175584  
H 0.682375 4.343141 -0.410435

INT1c.log

Energy (E) = -3153.08844875 Hartree

Enthalpy (H) = -3152.284256 Hartree

Gibbs free energy (G) = -3152.425906

Hartree

Charge = 0, Spin = 1

C -2.151540 0.062470 0.777320  
C -1.937472 3.382857 -0.426528  
C -2.769317 2.496969 0.476255  
H -2.636335 -0.055552 1.768485  
H -2.311093 -0.873813 0.226605  
H -2.360208 2.491503 1.500654  
H -3.782268 2.925777 0.544910  
C -0.698647 0.279317 0.988520  
C 0.267076 0.748193 1.680017  
C 1.792273 2.488221 -1.421917  
C 0.898356 1.871350 -2.216483  
C -0.509833 2.244557 -2.308322  
C -1.195117 2.856557 -1.366881  
H 1.212293 1.065878 -2.884692  
H -1.031634 1.983771 -3.234774  
H 1.433395 3.329491 -0.819408  
N -2.831849 1.118612 0.028420  
S -4.030030 0.663992 -1.029352  
O -4.720307 1.887209 -1.419392  
O -3.467370 -0.233275 -2.028450  
C -2.072976 4.858365 -0.185056  
H -1.822696 5.112630 0.857276  
H -1.416543 5.436792 -0.843974

H -3.110479 5.182895 -0.357285  
C 0.676532 1.656744 2.799975  
C 3.221676 2.213697 -1.327531  
C 3.835748 1.109658 -1.942110  
C 4.041575 3.108862 -0.622808  
C 5.210528 0.929062 -1.880148  
H 3.223718 0.380988 -2.473653  
C 5.420625 2.929295 -0.558009  
H 3.581679 3.968286 -0.131160  
C 6.014365 1.841967 -1.194757  
H 5.659581 0.061352 -2.364002  
H 6.034037 3.646242 -0.013012  
H 7.093530 1.699893 -1.150941  
Ni 0.918910 -0.536856 0.399886  
P 2.780782 -1.491311 0.948888  
O 3.941546 -0.964203 1.997841  
O 2.392075 -2.845043 1.794809  
O 3.679847 -2.179524 -0.218973  
C 4.761000 0.111538 1.569241  
H 4.211657 0.812247 0.920903  
H 5.107518 0.645290 2.461009  
H 5.627813 -0.268644 1.009439  
C 1.725656 -2.692679 3.036030  
H 0.884007 -1.985337 2.951764  
H 1.341612 -3.678128 3.319509  
H 2.421352 -2.336184 3.808179  
C 4.679862 -3.147571 0.074305  
H 4.217455 -4.124791 0.258224  
H 5.331737 -3.204752 -0.803957  
H 5.269970 -2.857812 0.953660  
P 0.140825 -1.781664 -1.191085  
O 0.977260 -3.010744 -1.908359  
O -1.154604 -2.690728 -0.753438  
O -0.476781 -0.989866 -2.453208  
C 2.069272 -2.659410 -2.740929  
H 2.619837 -1.794628 -2.344733  
H 2.752718 -3.514690 -2.768709  
H 1.718324 -2.437579 -3.759535  
C -1.041269 -3.462033 0.430812  
H -0.833656 -2.817743 1.300535  
H -2.001919 -3.966908 0.576553  
H -0.243904 -4.213220 0.340510  
C -1.242318 -1.653758 -3.460184  
H -2.221111 -1.936661 -3.062037  
H -1.380631 -0.929671 -4.268609  
H -0.713772 -2.541276 -3.832868

C -5.141794 -0.320059 -0.034419  
C -5.032923 -1.708166 -0.051464  
C -6.070467 0.328121 0.776878  
C -5.874178 -2.459957 0.764610  
H -4.302478 -2.182388 -0.707056  
C -6.906826 -0.433565 1.586832  
H -6.147562 1.414533 0.752099  
C -6.807152 -1.824437 1.581515  
H -5.804539 -3.546713 0.756821  
H -7.644569 0.059182 2.218041  
H -7.465954 -2.416790 2.214807  
C -0.226858 1.376428 4.005819  
H 0.021048 2.050290 4.840241  
H -1.286623 1.523621 3.752262  
H -0.104633 0.341536 4.356682  
C 2.135493 1.472808 3.200573  
H 2.357030 0.436850 3.489742  
H 2.795906 1.734366 2.362214  
H 2.381427 2.129721 4.048590  
C 0.489322 3.109432 2.347162  
H -0.558170 3.324090 2.097404  
H 0.799854 3.796871 3.148723  
H 1.095730 3.321985 1.454858

TS1c.log

Energy (E) = -3153.07352696 Hartree

Enthalpy (H) = -3152.255211 Hartree

Gibbs free energy (G) = -3152.393305 Hartree

Charge = 0, Spin = 1

Imaginary frequency: -442.4587

C -1.995977 0.584583 0.925496  
C -1.732367 3.212796 -0.603418  
C -2.708944 2.904379 0.500012  
H -2.033139 0.491445 2.024672  
H -2.217819 -0.407571 0.514599  
H -2.312452 3.135956 1.504636  
H -3.620064 3.503043 0.375479  
C -0.590272 0.999419 0.542558  
C 0.478864 1.294243 1.245429  
C 2.110177 1.843788 -1.262549  
C 1.162476 1.459828 -2.173882  
C -0.199847 1.832670 -2.115344  
C -0.863700 2.293581 -1.014164  
H 1.461207 0.826077 -3.013139  
H -0.838050 1.526013 -2.948099

H 1.834421 2.622467 -0.552399  
N -3.080238 1.488573 0.531417  
S -4.025909 0.964563 -0.762966  
O -4.884107 2.093407 -1.109380  
O -3.244010 0.290831 -1.796362  
C -1.839866 4.573290 -1.226166  
H -1.705063 5.368608 -0.473286  
H -1.086973 4.714676 -2.009680  
H -2.839228 4.715768 -1.667652  
C 0.992954 2.239495 2.291625  
C 3.536832 1.550472 -1.348266  
C 4.050705 0.435991 -2.030996  
C 4.452284 2.438260 -0.759572  
C 5.419632 0.224014 -2.125193  
H 3.360260 -0.280023 -2.477645  
C 5.824309 2.227226 -0.851781  
H 4.071569 3.315204 -0.231908  
C 6.316392 1.116937 -1.535174  
H 5.792890 -0.651661 -2.655642  
H 6.512439 2.935613 -0.391439  
H 7.389609 0.946505 -1.608169  
Ni 0.923139 -0.234679 0.226044  
P 2.463448 -1.461399 1.134231  
O 3.677529 -1.038899 2.172337  
O 1.737043 -2.517203 2.165538  
O 3.216482 -2.530236 0.167725  
C 4.766763 -0.300396 1.638625  
H 4.439785 0.401683 0.858641  
H 5.220019 0.264342 2.460496  
H 5.513916 -0.981075 1.205404  
C 1.117671 -1.995339 3.327153  
H 0.417712 -1.181870 3.070495  
H 0.562860 -2.815937 3.793919  
H 1.868659 -1.614192 4.033208  
C 3.892652 -3.668867 0.686870  
H 3.167748 -4.448678 0.950727  
H 4.556031 -4.031543 -0.105346  
H 4.484839 -3.411718 1.575061  
P -0.049841 -1.685486 -1.085458  
O 0.609459 -3.149716 -1.474478  
O -1.451715 -2.300489 -0.485097  
O -0.570399 -1.149065 -2.513779  
C 1.718435 -3.152993 -2.355619  
H 2.405063 -2.320414 -2.145945  
H 2.260914 -4.091541 -2.199553  
H 1.376878 -3.094822 -3.399643

C -1.401566 -2.994603 0.751561  
H -0.947319 -2.370583 1.536234  
H -2.436291 -3.224905 1.030007  
H -0.824279 -3.923824 0.656896  
C -1.496009 -1.876034 -3.319273  
H -2.517162 -1.601489 -3.030899  
H -1.315834 -1.574685 -4.356253  
H -1.348804 -2.959442 -3.218179  
C -5.012269 -0.294300 0.029942  
C -4.716717 -1.635887 -0.190544  
C -6.073233 0.098444 0.842430  
C -5.504206 -2.605975 0.426967  
H -3.878299 -1.906493 -0.832842  
C -6.853012 -0.878608 1.450196  
H -6.282161 1.157931 0.983527  
C -6.567695 -2.228767 1.242968  
H -5.287527 -3.660873 0.262445  
H -7.689613 -0.587678 2.083316  
H -7.182780 -2.991093 1.719168  
C 0.136433 2.033462 3.551041  
H 0.473809 2.710258 4.350913  
H -0.924638 2.244969 3.356216  
H 0.218168 1.002944 3.924943  
C 2.456507 1.997147 2.642531  
H 2.614418 0.983569 3.034618  
H 3.098932 2.114910 1.758113  
H 2.788299 2.718126 3.404843  
C 0.827224 3.695385 1.832630  
H -0.208809 3.920476 1.548051  
H 1.116175 4.372175 2.650793  
H 1.463887 3.929714 0.968413

INT2c.log

Energy (E) = -3153.16576955 Hartree

Enthalpy (H) = -3152.358524 Hartree

Gibbs free energy (G) = -3152.493088

Hartree

Charge = 0, Spin = 1

C -1.782303 0.348282 0.069287  
C -1.599020 1.649882 2.553625  
C -2.707760 1.967799 1.606743  
H -2.084781 -0.452468 -0.602716  
H -1.407492 1.172142 -0.567900  
H -3.618629 2.224974 2.164098  
H -2.444080 2.855911 0.988223  
C -0.708253 -0.116992 1.049660

C -0.001826 -1.354397 0.876696  
C 0.846252 -1.844019 2.081341  
C 0.920316 -0.894494 3.242622  
C 0.227166 0.242323 3.340384  
C -0.724843 0.641730 2.322784  
H 1.593521 -1.195107 4.048315  
H 0.327409 0.850724 4.238160  
H 0.350606 -2.752579 2.474905  
N -2.994468 0.806223 0.763868  
S -4.280206 1.081351 -0.297565  
O -5.333596 1.710221 0.490984  
O -3.818951 1.713434 -1.533895  
C -1.557991 2.567360 3.737120  
H -2.198494 2.217069 4.562403  
H -0.546125 2.713802 4.132934  
H -1.938691 3.560115 3.450783  
C -0.605509 -2.524129 0.024003  
C 2.294304 -2.244565 1.806935  
C 3.221729 -1.279914 1.402146  
C 2.769580 -3.524413 2.098308  
C 4.567640 -1.590922 1.240636  
H 2.870751 -0.258981 1.220260  
C 4.117324 -3.847152 1.941192  
H 2.073839 -4.288784 2.448370  
C 5.021709 -2.882360 1.504846  
H 5.263724 -0.821444 0.905767  
H 4.460380 -4.856382 2.167032  
H 6.075136 -3.131427 1.382022  
Ni 0.974760 0.211261 -0.020299  
P 2.282361 -0.149381 -1.724082  
O 2.546215 -1.524746 -2.606014  
O 1.865571 0.781536 -3.007997  
O 3.801171 0.399846 -1.503595  
C 3.179717 -2.621291 -1.966345  
H 2.889978 -2.702368 -0.908300  
H 2.879448 -3.531977 -2.495873  
H 4.273456 -2.512351 -2.014405  
C 0.571306 0.635082 -3.570951  
H -0.213206 0.769336 -2.810741  
H 0.462532 1.418513 -4.327578  
H 0.464620 -0.348984 -4.048260  
C 4.684563 0.609338 -2.599124  
H 4.459667 1.566616 -3.085949  
H 5.699911 0.633066 -2.190118  
H 4.602010 -0.198655 -3.337915  
P 1.226816 2.376919 -0.025882

O 2.728466 3.053205 -0.089484  
O 0.596609 3.099916 -1.342176  
O 0.549962 3.235164 1.188019  
C 3.663767 2.637630 0.894912  
H 4.059353 1.642656 0.650328  
H 4.482959 3.363535 0.885481  
H 3.212940 2.621791 1.899610  
C 1.313589 3.897850 -2.273198  
H 2.128378 3.320234 -2.729933  
H 0.591901 4.189781 -3.043046  
H 1.726033 4.796923 -1.797412  
C 0.514155 4.653937 1.153369  
H -0.088109 5.004202 0.303993  
H 0.047737 4.983633 2.087294  
H 1.527232 5.075000 1.084561  
C -4.770618 -0.584646 -0.693097  
C -4.464486 -1.110550 -1.943384  
C -5.468307 -1.319907 0.262489  
C -4.860391 -2.413003 -2.239687  
H -3.930561 -0.497508 -2.668515  
C -5.860122 -2.617495 -0.045221  
H -5.695468 -0.872246 1.228850  
C -5.555034 -3.161910 -1.293276  
H -4.627320 -2.840687 -3.213555  
H -6.406968 -3.206475 0.689157  
H -5.864653 -4.179132 -1.529217  
C -0.674398 -2.273812 -1.493029  
H -1.302651 -3.048511 -1.960289  
H -1.079178 -1.304242 -1.798100  
H 0.326276 -2.350591 -1.939073  
C 0.188900 -3.835954 0.127415  
H 1.240424 -3.716700 -0.156474  
H 0.150855 -4.286569 1.127049  
H -0.255724 -4.568099 -0.562308  
C -1.999975 -2.849431 0.592299  
H -2.725833 -2.038067 0.466749  
H -2.416193 -3.745588 0.106087  
H -1.933930 -3.055409 1.671314

SM2.log

Energy (E) = -1689.11735315 Hartree

Enthalpy (H) = -1688.540229 Hartree

Gibbs free energy (G) = -1688.641669

Hartree

Charge = 0, Spin = 1

C -1.046566 0.249193 -1.108299

C -1.149683 -1.137947 1.875701  
C -2.015445 -0.064004 1.244830  
H -1.130992 1.079396 -1.828357  
H -0.000500 -0.095572 -1.132040  
H -2.895021 -0.517804 0.765134  
H -2.392715 0.608190 2.024381  
C -1.918006 -0.843776 -1.501875  
C -2.603011 -1.798457 -1.791663  
C 3.198391 -2.029691 -0.217434  
C 2.169103 -1.558334 0.511377  
C 0.856058 -2.174735 0.536002  
C -0.160458 -1.684806 1.217143  
H 2.274175 -0.645425 1.101171  
H 0.699887 -3.061204 -0.090528  
H 3.054754 -2.961562 -0.774405  
N -1.388714 0.783826 0.228518  
S -0.310153 1.945700 0.780177  
O -0.693108 2.236748 2.156104  
O 1.066974 1.580495 0.456314  
C -1.493083 -1.565787 3.294132  
H -0.861429 -2.438616 3.521343  
C -3.409603 -2.991770 -2.074647  
C 4.519390 -1.419228 -0.333528  
C 4.779972 -0.099905 0.071458  
C 5.574513 -2.163792 -0.879497  
C 6.054944 0.437347 -0.043393  
H 3.969644 0.516736 0.460480  
C 6.851379 -1.625168 -0.995493  
H 5.384446 -3.186567 -1.208647  
C 7.098701 -0.321728 -0.573478  
H 6.235417 1.463291 0.275247  
H 7.656119 -2.225888 -1.417503  
H 8.096373 0.105275 -0.664012  
C -2.563097 -3.994645 -2.865536  
H -1.665765 -4.281724 -2.300930  
H -3.149546 -4.902166 -3.069107  
H -2.240994 -3.569818 -3.825356  
C -3.825527 -3.613072 -0.735870  
H -2.942755 -3.882782 -0.139250  
H -4.434847 -2.912271 -0.147958  
H -4.419326 -4.522061 -0.910082  
C -4.653667 -2.610244 -2.881640  
H -4.377048 -2.158037 -3.843170  
H -5.259667 -3.505201 -3.083545  
H -5.274688 -1.890207 -2.332493  
C -2.954371 -1.997331 3.404170

H -3.164437 -2.386340 4.409713  
H -3.639938 -1.153860 3.234914  
H -3.198975 -2.784410 2.677510  
C -1.162864 -0.468283 4.303443  
H -1.762311 0.437484 4.137246  
H -1.364959 -0.818834 5.325200  
H -0.107941 -0.173707 4.239393  
C -0.730706 3.345543 -0.242035  
C 0.127768 3.736071 -1.263477  
C -1.918846 4.024844 0.016416  
C -0.217899 4.833606 -2.048904  
H 1.054193 3.188069 -1.426656  
C -2.252130 5.119218 -0.771627  
H -2.563802 3.698199 0.830848  
C -1.402939 5.521084 -1.803125  
H 0.444135 5.152585 -2.851852  
H -3.174770 5.663854 -0.579654  
H -1.668109 6.379833 -2.417724

NiF2.log

Energy (E) = -368.913242634 Hartree

Enthalpy (H) = -368.905041 Hartree

Gibbs free energy (G) = -368.935754

Hartree

Charge = 0, Spin = 1

Ni -0.000000 -0.000000 0.361995

F 0.000000 1.416530 -0.563103

F -0.000000 -1.416530 -0.563103

INT4.log

Energy (E) = -2058.07998550 Hartree

Enthalpy (H) = -2057.492504 Hartree

Gibbs free energy (G) = -2057.607412

Hartree

Charge = 0, Spin = 1

C 2.751106 -0.050416 -1.247381

C 1.428780 1.443697 1.580012

C 2.594517 0.547451 1.215526

H 3.830721 -0.253741 -1.355424

H 2.232770 -0.738611 -1.929994

H 3.457571 1.158506 0.907055

H 2.908289 -0.019127 2.104889

C 2.464206 1.328013 -1.625910

C 2.254350 2.487430 -1.906292

C -2.753600 0.123323 -0.612171

C -1.775090 0.439798 0.345299

C -0.750778 1.445469 0.122618  
C 0.349597 1.446759 0.846265  
H -1.617388 -0.233609 1.190312  
H -0.893267 2.148336 -0.701620  
H -2.781639 0.756448 -1.503375  
N 2.334522 -0.375938 0.120813  
S 1.371581 -1.710859 0.362587  
O 1.123142 -1.765229 1.798123  
O 0.263405 -1.713741 -0.587513  
C 1.513850 2.239538 2.870516  
C 1.968678 3.895781 -2.210967  
Ni -3.510066 1.426284 0.768317  
F -3.361288 2.763566 -0.372230  
F -3.872183 0.318951 2.078174  
H 0.710892 2.992284 2.834959  
C 0.694131 3.993565 -3.056582  
H -0.176132 3.593180 -2.520162  
H 0.487295 5.045727 -3.299128  
H 0.801666 3.437665 -3.997531  
C 3.145897 4.498193 -2.985307  
H 3.303857 3.972111 -3.936317  
H 2.945217 5.556339 -3.206817  
H 4.075067 4.438139 -2.402879  
C 1.777550 4.653171 -0.891179  
H 0.961938 4.220180 -0.294857  
H 2.695777 4.622365 -0.288015  
H 1.534809 5.705766 -1.096144  
C 2.847828 2.968688 3.004075  
H 2.836934 3.622434 3.886204  
H 3.683463 2.265170 3.134396  
H 3.061171 3.591855 2.124446  
C 1.255257 1.326613 4.069000  
H 2.024825 0.546024 4.157053  
H 1.264873 1.906821 5.002085  
H 0.283159 0.824722 3.982100  
C -3.535954 -1.104712 -0.688308  
C -4.438060 -1.236871 -1.754436  
C -3.404321 -2.161044 0.225429  
C -5.196184 -2.390832 -1.906478  
H -4.542099 -0.415202 -2.464205  
C -4.160212 -3.313500 0.070433  
H -2.713265 -2.077526 1.061731  
C -5.057666 -3.432428 -0.992035  
H -5.894586 -2.478076 -2.737222  
H -4.051303 -4.127673 0.784972  
H -5.648633 -4.340283 -1.105701

C 2.436587 -3.068568 -0.091371  
C 3.513066 -3.381160 0.736906  
C 2.176825 -3.786020 -1.253989  
C 4.348561 -4.434471 0.384894  
H 3.681125 -2.810912 1.650349  
C 3.021831 -4.839331 -1.597311  
H 1.316396 -3.523147 -1.867073  
C 4.103310 -5.160516 -0.781578  
H 5.190209 -4.695068 1.024296  
H 2.829860 -5.412279 -2.502794  
H 4.759815 -5.986078 -1.051977

TS3.log

Energy (E) = -2058.04270415 Hartree

Enthalpy (H) = -2057.456438 Hartree

Gibbs free energy (G) = -2057.566125 Hartree

Charge = 0, Spin = 1

Imaginary frequency: -292.7518

C 2.737379 1.161564 -0.601838  
C 0.597190 1.103494 1.517849  
C 2.076560 0.972562 1.762175  
H 3.602446 1.840479 -0.599224  
H 2.849175 0.496466 -1.468853  
H 2.549200 1.959208 1.918183  
H 2.281877 0.375893 2.658788  
C 1.499555 1.990553 -0.772009  
C 1.079275 3.049969 -1.280141  
C -2.844059 -0.663218 -0.949270  
C -1.664447 -0.318734 -0.249997  
C -0.881268 0.831039 -0.544216  
C 0.162024 1.181994 0.255734  
H -1.267431 -1.002832 0.502691  
H -1.151898 1.439722 -1.407611  
H -3.109082 -0.016769 -1.791096  
N 2.775338 0.365204 0.624603  
S 2.546938 -1.302130 0.437968  
O 2.412551 -1.825269 1.791500  
O 1.541537 -1.606072 -0.576645  
C -0.344523 1.262423 2.693005  
C 0.288029 4.229482 -1.631979  
Ni -3.409373 0.522395 0.579954  
F -3.601272 1.920546 -0.498815  
F -3.388805 -0.637308 1.909366  
H -1.345779 1.473669 2.279058  
C -0.545102 3.977594 -2.893048



H -1.292786 3.189794 -2.731887  
H -1.085832 4.895237 -3.163778  
H 0.091464 3.690368 -3.740507  
C 1.244570 5.408324 -1.875998  
H 1.918259 5.206257 -2.719255  
H 0.660929 6.310050 -2.110034  
H 1.854959 5.614682 -0.986911  
C -0.636646 4.561845 -0.446891  
H -1.365514 3.760914 -0.262329  
H -0.053935 4.723794 0.470511  
H -1.192570 5.483712 -0.670879  
C 0.066742 2.440540 3.575103  
H -0.665436 2.592183 4.379586  
H 1.041600 2.260582 4.053411  
H 0.137137 3.373379 2.998157  
C -0.434714 -0.027340 3.507549  
H 0.534131 -0.293072 3.955039  
H -1.163396 0.092368 4.320574  
H -0.768332 -0.871214 2.891327  
C -3.513216 -1.961669 -0.923130  
C -4.472748 -2.221632 -1.913028  
C -3.223366 -2.963334 0.016667  
C -5.117417 -3.451061 -1.976418  
H -4.709063 -1.442804 -2.639126  
C -3.867239 -4.190082 -0.049286  
H -2.516790 -2.767669 0.820231  
C -4.813709 -4.440229 -1.044225  
H -5.858072 -3.636595 -2.752799  
H -3.636436 -4.957480 0.687789  
H -5.316927 -5.405159 -1.087754  
C 4.126047 -1.787683 -0.230751  
C 5.256415 -1.698724 0.579201  
C 4.192868 -2.275677 -1.531309  
C 6.482757 -2.101715 0.065457  
H 5.167159 -1.322298 1.597317  
C 5.428734 -2.675623 -2.035877  
H 3.283992 -2.347118 -2.126442  
C 6.567660 -2.587513 -1.240463  
H 7.375556 -2.041921 0.685426  
H 5.498163 -3.061253 -3.051471  
H 7.531190 -2.903285 -1.637541

INT5.log

Energy (E) = -2058.14273276 Hartree

Enthalpy (H) = -2057.553813 Hartree

Gibbs free energy (G) = -2057.659501

Hartree

Charge = 0, Spin = 1

C -2.195733 0.213215 -1.252790  
C -0.329323 -1.750513 0.018053  
C -1.612861 -2.148881 -0.692171  
H -2.022586 0.066172 -2.330782  
H -3.010015 0.943393 -1.162190  
H -1.417391 -2.403463 -1.747568  
H -2.069089 -3.035255 -0.236305  
C -0.937330 0.594851 -0.555688  
C -0.146457 1.605818 -0.118609  
C 3.281377 -0.123820 0.526371  
C 2.184472 0.446226 -0.137179  
C 0.864766 0.637492 0.530363  
C -0.105614 -0.434780 0.022754  
H 2.158582 0.431991 -1.232081  
H 0.966293 0.716349 1.622161  
H 3.187780 -0.198439 1.614765  
N -2.646578 -1.090981 -0.717264  
S -3.564893 -0.947847 0.698384  
O -3.696902 -2.300204 1.228543  
O -3.083889 0.136863 1.550482  
C 0.561736 -2.787595 0.639596  
C -0.232273 3.097083 -0.093356  
Ni 3.477254 1.920891 0.295346  
F 2.987521 2.204917 1.960345  
F 4.084924 1.963395 -1.351849  
H 1.424017 -2.249546 1.073494  
C -0.225437 3.551752 1.371990  
H 0.708449 3.262413 1.874157  
H -0.315609 4.646898 1.426649  
H -1.068596 3.107734 1.921094  
C -1.534278 3.532739 -0.762392  
H -2.404545 3.114731 -0.233489  
H -1.626524 4.627959 -0.745550  
H -1.575947 3.208753 -1.813608  
C 0.957414 3.725789 -0.825008  
H 1.902985 3.530961 -0.293756  
H 1.062875 3.343456 -1.850280  
H 0.841344 4.818501 -0.871084  
C 1.097784 -3.761802 -0.409223  
H 1.797338 -4.477535 0.044202  
H 0.282519 -4.344155 -0.865062  
H 1.627626 -3.231981 -1.213868  
C -0.144576 -3.530216 1.774246

H -0.992532 -4.124004 1.403705  
H 0.548927 -4.222637 2.271091  
H -0.537689 -2.832698 2.525162  
C 4.374378 -0.895548 -0.055778  
C 5.167833 -1.650283 0.821362  
C 4.623446 -0.971869 -1.435671  
C 6.175978 -2.475523 0.337419  
H 4.980781 -1.587936 1.894083  
C 5.633963 -1.791743 -1.914856  
H 4.048849 -0.357254 -2.124908  
C 6.409568 -2.547643 -1.033347  
H 6.780515 -3.058867 1.029768  
H 5.826276 -1.838614 -2.985387  
H 7.200657 -3.189427 -1.418447  
C -5.133065 -0.428076 0.027283  
C -5.879622 -1.338458 -0.717406  
C -5.591874 0.859665 0.283036  
C -7.112118 -0.942136 -1.221834  
H -5.494898 -2.342463 -0.890642  
C -6.828816 1.246437 -0.229260  
H -4.986344 1.536539 0.884187  
C -7.584065 0.348734 -0.978849  
H -7.709926 -1.642079 -1.803052  
H -7.202949 2.250519 -0.037074  
H -8.551278 0.653880 -1.375363

I.log

Energy (E) = -2058.04746784 Hartree

Enthalpy (H) = -2057.460677 Hartree

Gibbs free energy (G) = -2057.575006

Hartree

Charge = 0, Spin = 1

C -3.339909 0.064508 -1.415403  
C -1.565043 -0.729880 1.567147  
C -2.503544 0.272820 0.936755  
H -4.245087 0.683275 -1.265950  
H -2.979691 0.242908 -2.435919  
H -3.546900 -0.058424 1.058493  
H -2.428207 1.230408 1.480002  
C -3.657278 -1.343563 -1.217101  
C -3.881317 -2.506823 -0.966008  
C 2.344393 -1.793807 -1.008255  
C 1.342270 -1.332918 -0.227336  
C 0.119486 -2.046607 0.059332  
C -0.792206 -1.471746 0.821719  
H 1.434301 -0.357813 0.254332

H -0.042083 -3.032975 -0.385179  
H 2.304731 -2.809714 -1.408868  
N -2.274291 0.474263 -0.491470  
S -1.253516 1.711791 -0.943534  
O -0.108061 1.660844 -0.044764  
O -1.098076 1.614543 -2.388176  
C -1.486977 -0.775863 3.083013  
C -4.109714 -3.918636 -0.633805  
Ni 4.912043 -0.023691 0.544233  
F 6.311521 0.081878 1.610108  
F 3.699789 -0.384905 1.775774  
H -0.932849 -1.689323 3.347111  
C -3.284866 -4.804461 -1.573319  
H -2.213083 -4.581899 -1.485269  
H -3.439865 -5.863814 -1.322728  
H -3.578770 -4.650869 -2.620108  
C -5.597583 -4.251096 -0.783329  
H -5.937702 -4.086788 -1.814478  
H -5.772652 -5.305930 -0.527067  
H -6.210657 -3.628735 -0.117925  
C -3.669954 -4.149790 0.817406  
H -2.610060 -3.893732 0.958172  
H -4.260952 -3.531676 1.507958  
H -3.813671 -5.205465 1.089806  
C -2.868062 -0.848079 3.728221  
H -2.775126 -0.980488 4.814260  
H -3.441953 0.076278 3.564110  
H -3.456977 -1.688581 3.334254  
C -0.685805 0.421186 3.595875  
H -1.189664 1.372997 3.367550  
H -0.571123 0.366584 4.687066  
H 0.315323 0.451582 3.146183  
C 3.548047 -1.035936 -1.257526  
C 4.747857 -1.714040 -1.603518  
C 3.575795 0.380395 -1.133868  
C 5.945390 -1.031715 -1.606101  
H 4.721277 -2.791844 -1.755156  
C 4.783442 1.089957 -1.258850  
H 2.646908 0.919922 -0.957796  
C 5.983116 0.365824 -1.354645  
H 6.881472 -1.569104 -1.743880  
H 4.793603 2.173575 -1.169688  
H 6.938006 0.882398 -1.307455  
C -2.136543 3.219677 -0.583390  
C -1.892126 3.888350 0.614268  
C -3.085805 3.679667 -1.495291

C -2.624451 5.036306 0.905951  
H -1.119470 3.521978 1.288972  
C -3.811196 4.826892 -1.191228  
H -3.230799 3.158824 -2.440945  
C -3.583169 5.500691 0.008196  
H -2.437824 5.573748 1.834056  
H -4.548998 5.203010 -1.897852  
H -4.150527 6.400814 0.239369

### II.log

Energy (E) = -2058.07383488 Hartree

Enthalpy (H) = -2057.486975 Hartree

Gibbs free energy (G) = -2057.600134 Hartree

Charge = 0, Spin = 1

C -1.760424 0.687328 -1.096273  
C 0.020832 -0.430008 1.792246  
C -0.764833 0.707962 1.180684  
H -2.540498 1.427342 -0.842520  
H -1.476841 0.838110 -2.146311  
H -1.842172 0.571400 1.364377  
H -0.489409 1.646364 1.689526  
C -2.305238 -0.669307 -0.947058  
C -2.496025 -1.882972 -0.774212  
C 4.282881 -1.817532 -0.201590  
C 3.281760 -1.175376 0.429687  
C 1.919430 -1.673990 0.471749  
C 0.944078 -1.072784 1.123593  
H 3.455473 -0.223536 0.935304  
H 1.710233 -2.593167 -0.087441  
H 4.059082 -2.780077 -0.673535  
N -0.572657 0.850064 -0.266487  
S 0.546024 1.984789 -0.798013  
O 1.686588 1.884600 0.096886  
O 0.659343 1.795664 -2.236883  
C -0.316579 -0.790051 3.231916  
C -2.466652 -3.356125 -0.711332  
Ni -4.250382 -0.876742 -0.415199  
F -4.960617 -1.583119 -1.840193  
F -3.908541 -0.068386 1.106425  
H 0.513365 -1.408505 3.607491  
C -2.864753 -3.936489 -2.072398  
H -2.169380 -3.610115 -2.856704  
H -2.830440 -5.033574 -2.015169  
H -3.875693 -3.620621 -2.353553  
C -3.409662 -3.863776 0.383230

H -4.457933 -3.659706 0.124400  
H -3.294121 -4.951482 0.485593  
H -3.188698 -3.399313 1.354034  
C -1.016526 -3.738217 -0.377378  
H -0.326482 -3.372953 -1.150021  
H -0.702386 -3.322949 0.590246  
H -0.939725 -4.833484 -0.334461  
C -1.596301 -1.625259 3.287490  
H -1.865600 -1.853051 4.328720  
H -2.447265 -1.100296 2.827235  
H -1.459012 -2.580109 2.759750  
C -0.434041 0.442362 4.126047  
H -1.320933 1.042409 3.875004  
H -0.539257 0.138461 5.176072  
H 0.452604 1.086929 4.049125  
C 5.667175 -1.368691 -0.316091  
C 6.642330 -2.266657 -0.774153  
C 6.071414 -0.062741 0.005202  
C 7.975612 -1.886742 -0.887856  
H 6.342638 -3.282114 -1.038349  
C 7.402103 0.317359 -0.107642  
H 5.330559 0.668787 0.326970  
C 8.362915 -0.592248 -0.551412  
H 8.714527 -2.604411 -1.242503  
H 7.692824 1.337059 0.142581  
H 9.404977 -0.289013 -0.642251  
C -0.216339 3.574820 -0.520612  
C 0.044148 4.260611 0.664339  
C -1.083729 4.090002 -1.483256  
C -0.591224 5.477775 0.892791  
H 0.757276 3.853021 1.378974  
C -1.713154 5.307111 -1.242391  
H -1.237198 3.556636 -2.420252  
C -1.471101 5.996070 -0.055080  
H -0.390978 6.026866 1.811178  
H -2.386459 5.723923 -1.989371  
H -1.963761 6.949713 0.127494

### III.log

Energy (E) = -2058.09031404 Hartree

Enthalpy (H) = -2057.502951 Hartree

Gibbs free energy (G) = -2057.613697 Hartree

Charge = 0, Spin = 1

C -0.075685 -1.376892 -2.002629  
C 1.321083 -0.935584 1.215758

C 0.497176 -1.896964 0.386564  
H -0.251173 -2.415669 -2.342884  
H -0.767876 -0.725951 -2.551557  
H 1.166593 -2.566004 -0.177664  
H -0.080816 -2.547684 1.062133  
C 1.308142 -1.001498 -2.255306  
C 2.480073 -0.719285 -2.378885  
C -0.780171 2.991099 -0.500931  
C -0.327283 2.027697 0.337413  
C 0.943400 1.408492 0.112879  
C 1.395687 0.323045 0.844164  
H -0.920298 1.649695 1.171200  
H 1.553315 1.754799 -0.729467  
H -0.103108 3.338057 -1.288354  
N -0.390277 -1.241131 -0.570408  
S -1.994677 -1.081124 -0.135199  
O -2.002271 -0.664844 1.260876  
O -2.627371 -0.281907 -1.175277  
C 1.990768 -1.482256 2.455869  
C 3.909225 -0.405587 -2.508568  
Ni 2.348974 1.745709 1.706667  
F 3.666386 1.864200 0.540801  
F 1.242749 1.806735 3.067568  
H 2.726458 -0.730842 2.782780  
C 4.099854 1.103828 -2.692703  
H 3.773276 1.651404 -1.798661  
H 5.166712 1.323124 -2.844442  
H 3.546503 1.468017 -3.569584  
C 4.473492 -1.156340 -3.719727  
H 3.975258 -0.843967 -4.647678  
H 5.547952 -0.945202 -3.818518  
H 4.344369 -2.241759 -3.609897  
C 4.622788 -0.859821 -1.228672  
H 4.236251 -0.318594 -0.353562  
H 4.496102 -1.941493 -1.074302  
H 5.698588 -0.646950 -1.311204  
C 2.731532 -2.790112 2.190411  
H 3.283758 -3.099479 3.087464  
H 2.039293 -3.608285 1.940990  
H 3.453074 -2.689580 1.367676  
C 0.955117 -1.632651 3.570621  
H 0.181358 -2.370418 3.307069  
H 1.437985 -1.980046 4.494363  
H 0.462622 -0.672943 3.769335  
C -2.086987 3.617633 -0.473458  
C -2.323827 4.725478 -1.302627

C -3.129151 3.154441 0.348187  
C -3.555696 5.367342 -1.300795  
H -1.522045 5.084280 -1.949374  
C -4.359105 3.795107 0.346841  
H -2.978964 2.276907 0.975679  
C -4.576150 4.904057 -0.473094  
H -3.721329 6.228941 -1.945600  
H -5.159968 3.424216 0.984380  
H -5.544733 5.401904 -0.470431  
C -2.685493 -2.723879 -0.203485  
C -2.748139 -3.487616 0.960430  
C -3.120427 -3.225231 -1.429609  
C -3.245572 -4.785831 0.887680  
H -2.436569 -3.053098 1.909429  
C -3.614596 -4.524480 -1.488415  
H -3.096061 -2.592699 -2.316014  
C -3.672883 -5.303155 -0.333417  
H -3.308370 -5.391038 1.790381  
H -3.965982 -4.926454 -2.437117  
H -4.064803 -6.317737 -0.384298
